# Supplementary material
Source: publisher figshare collection journal article supplement (https://gsapubs.figshare.com/articles/dataset/_/12532370)
Supplement: Supplementary file 1 [file 1]

Table DR1. Whole rock geochemistry of Jurassic volcanic and plutonic rocks in the lower Colorado River region, southern California and southwest Arizona.

Analytical methods: major elements—wavelength-dispersive X-ray fluorescence (Taggart et al., 1987); FeO, H<sub>2</sub>O, CO<sub>2</sub> (Jackson et al., 1987); Rb—energy-dispersive X-ray trace elements by energy dispersive X-ray fluorescence (Johnson and King, 1987) or direct-current-arc quantitative emission spectrometry (Golightly et al., 1987) \* Analytical data from Hayes (1992); only total Fe concentration and LOI reported.

Table DR2. U-Pb thermal ionization mass spectrometry (TIMS) geochronologic data for zircon and sphene from Jurassic volcanic and plutonic rocks, lower Colorado River region, Arizona and California. Sample locations are UTM WGS84.

Table DR3. U-Pb SHRIMP-RG data for volcanic and plutonic rocks from the lower Colorado River region, Arizona and California. Sample locations are in UTM WGS84. Data reduction for geochronology follows the methods described by Williams (1996), and Ireland and Williams (2003), and uses the MS Excel add-in Squid and Isoplot programs of Ludwig (2001, 2008) using R33 (419 Ma) and Temora (416.8 Ma) standards as a references (Black et al., 2004).

Table DR4. Trace element geochemistry of zircon from Jurassic volcanic and plutonic rocks in the lower Colorado River region, Arizona and California. 1. Analytical procedures are described in Barth and Wooden (2010).

Table DR5. Pb isotopic compositions for feldspar from Jurassic volcanic and plutonic rocks, lower Colorado River region, Arizona and California. 1. Isotopic compositions measured from feldspar mineral separate after standard chromatography separation of elements Finnigan MAT261 at the U.S. Geological Survey, Menlo Park.

Table DR6. Sr and Nd isotopic compositions for Jurassic volcanic and intrusive rocks, lower Colorado River region, Arizona and California.

1. Isotopic compositions measured after standard chromatography separation of elements on Finnigan MAT261 at the U.S. Geological Survey, Menlo Park. Rubidium and Sr concentrations are from Table 1. Sm and Nd concentrations were measured using isotope dilution techniques at the U.S. Geological Survey in Menlo Park. 2. Locations: CM, Chocolate Mountains; CMM, Cargo Muchacho Mountains; DRM, Dome Rock Mountains; MM; Mule Mountains TM, Trigo Mountains; TP, Trigo Peaks.

### References Cited (for Data Repository)

- Barth, A.P., and Wooden, J.L., 2010, Coupled elemental and isotopic analysis of polygenetic zircons from granitic rocks by ion microprobe, with implications for melt evolution and the source of granitic magmas. *Chemical Geol.*, 277, p. 149-159.
- Black, L.P., Kamo, S.L., Allen, C.M., Davis, D.W., Aleinikoff, J.N., Valley, J.W., Mundil, R., Campbell, I.H., Korsch, R.J., Williams, I.W., and Foudoulis, C., 2004, U-Pb microprobe geochronology by the monitoring of a trace-element-related matrix effect; SHRIMP, ID-TIMS, ELA-ICP-MS and oxygen isotope documentation for a series of zircon standards: *Chemical Geology*, v. 205, p. 115–140, doi:10.1016/j.chemgeo.2004.01.003.

- Golightly, D.W., Dorrzapf, A.F., Mays, R.E., Fries, T.L., and Conklin, N.M., 1987, Analysis of geological materials by direct-current arc emission spectrography and spectrometry, *in* Baedeker, P.A., ed., *Methods for geochemical analysis: U.S. Geological Survey Bulletin 1770*, p. A1–A13.
- Hayes, E.M., 1992, Petrology of Jurassic plutons and older crystalline units, the Cargo Muchacho Mountains, southeastern California: Los Angeles, University of Southern California, unpublished M.Sc. thesis, 174 p.
- Ireland, T.R., and Williams, I.S., 2003, Considerations in zircon geochronology by SIMS, *in* Hanchar, J.M., and Hoskin, P.W.O., eds.: *Zircon: Reviews in Mineralogy and Geochemistry*, v. 53, p. 215–241.
- Jackson, L.L., Brown, F.W., and Neil, S.T., 1987, Major and minor elements requiring individual determination, classical whole rock analysis, and rapid rock analysis, *in* Baedeker, P.A., ed., *Methods for geochemical analysis: U.S. Geological Survey Bulletin 1770*, p. G1–G23.
- Johnson, R.G., and King, B.-S.L., 1987, Energy-dispersive X-ray fluorescence spectrometry, *in* Baedeker, P.A., ed., *Methods for geochemical analysis: U.S. Geological Survey Bulletin 1770*, p. F1–F5.
- Krogh, T.E., 1973, A low-contamination method for hydrothermal decomposition of zircon and extraction of U and Pb for isotopic age determinations: *Geochimica et Cosmochimica Acta*, v. 37, p. 485–494, doi:10.1016/0016-7037(73)90213-5.
- Ludwig, K.R., 2001, SQUID: A user's manual: Berkeley Geochronology Center, Special Publication 2, 22 p.
- Ludwig, K.R., 2008, User's manual for Isoplot 3.6: A geochronological toolkit for Microsoft Excel: Berkeley Geochronology Center, Special Publication 4, 77 p.
- Mattinson, J.M., 1987, U-Pb ages of zircons: A basic examination of error propagation: *Chemical Geology*, v. 66, p. 151–162.
- Taggart, J.E., Lindsay, J.R., Scott, B.A., Vivit, D.V., Bartel, A.J., and Stewart, K.C., 1987, Analysis of geologic materials by wavelength dispersive x-ray fluorescence spectrometry, *in* Baedeker, P.A., ed., *Methods for geochemical analysis: U.S. Geological Survey Bulletin 1770*, p. E1–E19.
- Williams, I.S., 1996, U-Th-Pb geochronology by ion microprobe: *Reviews in Economic Geology*, v. 7, p. 1–36.

Table DR1. Whole rock geochemistry of Jurassic volcanic and plutonic rocks in the lower Colorado River region, southern California and southwest Arizona

|                                                | SiO2 | TiO2 | Al2O3 | FE2O3  | FeO  | MgO  | CaO  | Na2O | K2O  | P2O5 | MnO  | H2O+ | H2O- | CO2  | TOTAL | Fe(total) | Ba   | La  | Nb  | Rb  | Sr   | Y   | Zr  |
|------------------------------------------------|------|------|-------|--------|------|------|------|------|------|------|------|------|------|------|-------|-----------|------|-----|-----|-----|------|-----|-----|
| DOME ROCK SEQUENCE                             |      |      |       |        |      |      |      |      |      |      |      |      |      |      |       |           |      |     |     |     |      |     |     |
| Dome Rock Mountains                            |      |      |       |        |      |      |      |      |      |      |      |      |      |      |       |           |      |     |     |     |      |     |     |
| TM-826                                         | 64.6 | 0.59 | 15.2  | 2.56   | 2.09 | 1.67 | 3.17 | 3.22 | 4.45 | 0.2  | 0.07 | 0.97 | 0.04 | 0.16 | 99.0  | 4.9       | 1050 | 34  | 19  | 175 | 335  | 34  | 195 |
| TUK-18                                         | 64.7 | 0.52 | 15.3  | 1.83   | 2.32 | 1.55 | 2.89 | 3.08 | 4.63 | 0.17 | 0.15 | 1.02 | 0.18 | 0.39 | 98.7  | 4.4       | 1200 | 22  | 16  | 155 | 345  | 34  | 166 |
| TUK-63                                         | 65.5 | 0.51 | 15.4  | 2.6    | 1.61 | 1.47 | 2.96 | 3.55 | 3.72 | 0.15 | 0.07 | 1.04 | 0.07 | 0.28 | 98.9  | 4.4       | 930  | 50  | 17  | 130 | 320  | 32  | 210 |
| TUK-13                                         | 67.9 | 0.5  | 14.4  | 3.32   | 0.81 | 1.41 | 3.32 | 2.08 | 3.59 | 0.16 | 0.06 | 1.23 | 0.11 | 0.11 | 99.0  | 4.2       | 1050 | 48  | 18  | 150 | 175  | 30  | 175 |
| TM-844                                         | 69.9 | 0.38 | 13.4  | 2.88   | 0.25 | 0.46 | 0.61 | 1.19 | 8.67 | 0.13 | 0.02 | 0.46 | 0.02 | 0.26 | 98.6  | 3.2       | 1500 | <20 | 18  | 285 | 80   | 30  | 160 |
| Cargo Muchacho Mts                             |      |      |       |        |      |      |      |      |      |      |      |      |      |      |       |           |      |     |     |     |      |     |     |
| TUK 46                                         | 66.6 | 0.26 | 16.9  | 1.2    | 1.3  | 0.55 | 3.88 | 3.5  | 4.01 | 0.21 | 0.1  | 0.42 | 0.2  | 0.04 | 99.2  | 2.6       | 1500 | 50  | 10  | 130 | 930  | 38  | 240 |
| MC 18                                          | 61.4 | 0.49 | 17.5  | 2.07   | 3.07 | 2.26 | 4.16 | 3.95 | 2.54 | 0.34 | 0.13 | 1.03 | 0.16 | 0.3  | 99.4  | 5.5       | 680  | 38  | 10  | 78  | 990  | 38  | 194 |
| MC 19                                          | 61.5 | 0.5  | 17.3  | 3.84   | 1.46 | 2.14 | 4.24 | 3.53 | 3.37 | 0.33 | 0.12 | 0.69 | 0.2  | 0.01 | 99.2  | 5.5       | 1100 | 54  | 10  | 94  | 1100 | 38  | 186 |
| MC 31                                          | 64.7 | 0.54 | 15.8  | 4.05   | 1.16 | 1.3  | 3.92 | 3.14 | 2.9  | 0.29 | 0.09 | 0.89 | 0.14 | 0.05 | 99.0  | 2.3       | 1100 | 26  | 12  | 100 | 700  | 28  | 170 |
| MC 50                                          | 59.8 | 0.79 | 16.2  | 2.59   | 3.91 | 3    | 4.73 | 3.4  | 3.65 | 0.26 | 0.12 | 0.82 | 0.17 | 0.06 | 99.5  | 6.9       | 920  | 30  | 24  | 120 | 540  | 50  | 240 |
| MC 53                                          | 54.4 | 0.37 | 20.9  | 1.59   | 3.18 | 1.7  | 6.69 | 3.9  | 3.77 | 0.63 | 0.19 | 0.81 | 0.41 | 0.05 | 98.6  | 5.1       | 2100 | 80  | <10 | 110 | 1300 | 50  | 370 |
| MC 169                                         | 66.2 | 15.1 | 2.69  | 1.39   | 1.23 | 2.82 | 4.15 | 4.83 | 0.38 | 0.23 | 0.05 | 0.26 | 0.15 | 0.02 | 99.5  | 4.2       | 1300 | 68  | 10  | 166 | 710  | 24  | 178 |
| MC 170                                         | 66.7 | 16.2 | 1.98  | 1.25   | 0.95 | 2.4  | 4.24 | 4.2  | 0.32 | 0.17 | 0.04 | 0.26 | 0.2  | 0.02 | 98.9  | 3.4       | 1400 | 30  | 10  | 184 | 1100 | 16  | 144 |
| MC 108                                         | 68.7 | 14.4 | 2.52  | 1.27   | 0.51 | 1.74 | 3.51 | 5.69 | 0.39 | 0.23 | 0.04 | 0.07 | 0.08 | 0.14 | 98.6  | 3.9       | 1200 | 44  | 12  | 205 | 710  | 20  | 195 |
| MC 142                                         | 68.0 | 15.1 | -0.26 | 2.71   | 1.17 | 3.11 | 3.86 | 4.27 | 0.43 | 0.15 | 0.05 | 0.25 | 0.08 | 0.01 | 98.9  | 2.8       | 1300 | 66  | 16  | 152 | 415  | 32  | 220 |
| MC 148                                         | 67.0 | 16.5 | 1.08  | 1.5    | 0.88 | 2.71 | 3.44 | 5.16 | 0.3  | 0.16 | 0.08 | 0.29 | 0.27 | 0.01 | 99.4  | 2.7       | 1300 | 40  | 10  | 188 | 770  | 16  | 138 |
| MC 168                                         | 67.9 | 14.9 | 2.32  | 1.1    | 0.72 | 2.75 | 3.1  | 5.52 | 0.26 | 0.14 | 0.08 | 0.23 | 0.14 | 0.11 | 98.6  | 3.5       | 1200 | 30  | 10  | 182 | 650  | 16  | 114 |
| MC 228                                         | 60.3 | 15.7 | 3.18  | 3.1    | 2.78 | 5.4  | 3.12 | 3.42 | 0.78 | 0.26 | 0.12 | 0.24 | 0.14 | 0.2  | 98.7  | 6.6       | 950  | 48  | 16  | 180 | 530  | 40  | 260 |
| MC 229                                         | 63.6 | 16.6 | 2.81  | 1.39   | 1.27 | 3.1  | 4.65 | 4.92 | 0.4  | 0.24 | 0.08 | 0.11 | 0.06 | 0.05 | 99.3  | 4.4       | 1500 | 30  | 10  | 160 | 800  | 18  | 146 |
| MC 231                                         | 59.6 | 15.9 | 3     | 3.13   | 3.07 | 5.68 | 2.95 | 3.5  | 0.8  | 0.24 | 0.11 | 0.93 | 0.11 | 0.18 | 98.6  | 6.5       | 1100 | 66  | 12  | 142 | 620  | 30  | 220 |
| MC 233                                         | 60.5 | 15.7 | 3.02  | 3.26   | 3.17 | 6.03 | 3.87 | 2.17 | 0.81 | 0.24 | 0.12 | 0.63 | 0.14 | 0.07 | 99.7  | 6.6       | 520  | 30  | 14  | 80  | 630  | 28  | 220 |
| MC 217                                         | 71.3 | 14.2 | 1.07  | 1.07   | 0.63 | 1.44 | 3.36 | 5.33 | 0.32 | 0.08 | 0.06 | 0.16 | 0.21 | 0.01 | 99.2  | 2.3       | 1200 | 30  | 20  | 210 | 290  | 32  | 235 |
| MC 211A                                        | 70.7 | 14.2 | 1.24  | 1.4    | 0.72 | 0.98 | 3.82 | 5.17 | 0.35 | 0.11 | 0.06 | 0.1  | 0.1  | 0.01 | 98.6  | 2.8       | 990  | 42  | 20  | 240 | 220  | 28  | 225 |
| MC 209B                                        | 69.6 | 14.3 | 1.45  | 1.32   | 1.05 | 2.44 | 3.39 | 4.61 | 0.35 | 0.13 | 0.07 | 0.33 | 0.07 | 0.1  | 98.6  | 2.9       | 1000 | 62  | 18  | 182 | 335  | 24  | 210 |
| TUK 81                                         | 69.1 | 0.27 | 14.8  | 2.01   | 1.31 | 0.74 | 2.47 | 4.17 | 3.72 | 0.14 | 0.07 | 0.26 | 0.06 | 0.01 | 99.1  | 3.5       | 1200 | 42  | 10  | 96  | 890  | 18  | 132 |
| KITT PEAK - TRIGO PEAKS SUPERUNIT              |      |      |       |        |      |      |      |      |      |      |      |      |      |      |       |           |      |     |     |     |      |     |     |
| Araz Wash diorite unit                         |      |      |       |        |      |      |      |      |      |      |      |      |      |      |       |           |      |     |     |     |      |     |     |
| Dome Rocks Mts.                                |      |      |       |        |      |      |      |      |      |      |      |      |      |      |       |           |      |     |     |     |      |     |     |
| TM 937                                         | 56.9 | 0.97 | 16.8  | 4.0956 | 3.04 | 2.81 | 6.02 | 3.17 | 3.66 | 0.41 | 0.16 | 1.4  | 0.06 | 0.04 | 99.5  | 7.5       | 860  | 30  | 13  | 152 | 530  | 36  | 200 |
| TM 941                                         | 58.6 | 0.69 | 15.4  | 2.7308 | 4.72 | 2.9  | 4.91 | 4.01 | 3.24 | 0.22 | 0.21 | 0.81 | 0.09 | 0.56 | 99.1  | 8.0       | 700  | <30 | 15  | 142 | 330  | 38  | 194 |
| TM 908                                         | 58.8 | 0.93 | 16.5  | 4.0958 | 2.22 | 2.57 | 5.49 | 3.54 | 2.93 | 0.37 | 0.13 | 1.43 | 0.17 | 0.05 | 99.2  | 6.6       | 690  | 49  | 12  | 166 | 475  | 36  | 182 |
| TM 940                                         | 60.7 | 0.77 | 14.9  | 3.4032 | 2.88 | 3.1  | 4.97 | 2.71 | 4.44 | 0.25 | 0.14 | 0.43 | 0.16 | 0.3  | 99.2  | 6.6       | 790  | 35  | 17  | 148 | 350  | 36  | 250 |
| Trigo Peaks and northern Trigo Mts.            |      |      |       |        |      |      |      |      |      |      |      |      |      |      |       |           |      |     |     |     |      |     |     |
| TM 652                                         | 43.7 | 0.31 | 18.6  | 3.9674 | 4.66 | 13.4 | 9.55 | 0.98 | 0.66 | 0.11 | 0.1  | 3.69 | 0.19 | 0.37 | 100.3 | 9.1       | 165  | 20  | 10  | 16  | 640  | 10  | 40  |
| TM 562                                         | 43.8 | 0.96 | 21.1  | 6.1842 | 5.78 | 5.73 | 12.7 | 1.58 | 0.42 | 0.09 | 0.1  | 1.39 | 0.09 | 0.06 | 100.0 | 12.6      | 210  | 20  | 10  | 20  | 730  | 10  | 48  |
| TM 453                                         | 48.4 | 1.53 | 20.3  | 4.3263 | 3.67 | 3.2  | 8.72 | 2.99 | 2.73 | 0.99 | 0.14 | 1.57 | 0.18 | 0.12 | 98.9  | 8.4       | 2000 | 50  | 13  | 66  | 1150 | 45  | 220 |
| TM 642                                         | 48.9 | 0.6  | 18.3  | 3.6483 | 4.47 | 7.35 | 10.3 | 2.02 | 1.12 | 0.19 | 0.12 | 2.7  | 0.16 | 0.04 | 99.9  | 8.6       | 860  | 20  | 10  | 32  | 600  | 14  | 95  |
| TM 790                                         | 50.2 | 1.26 | 16.4  | 6.1161 | 4.49 | 5.24 | 8.49 | 3.03 | 1.69 | 0.31 | 0.17 | 2.14 | 0.19 | 0.07 | 99.8  | 11.1      | 750  | 30  | 10  | 39  | 650  | 27  | 150 |
| TM 443                                         | 50.9 | 1.01 | 16.7  | 5.3494 | 4.46 | 6.19 | 8.2  | 2.65 | 1.56 | 0.31 | 0.13 | 1.77 | 0.16 | 0.16 | 99.5  | 10.3      | 860  | 30  | 10  | 54  | 610  | 24  | 180 |
| TM 775                                         | 51.1 | 1.7  | 17.2  | 3.189  | 5.1  | 4.02 | 7.4  | 4.25 | 1.27 | 0.99 | 0.13 | 2.68 | 0.07 | 0.94 | 100.0 | 8.9       | 500  | 40  | 12  | 28  | 590  | 40  | 190 |
| TM 640                                         | 52.4 | 1.03 | 16.8  | 4.1286 | 4.74 | 5.76 | 7.44 | 2.84 | 1.93 | 0.4  | 0.13 | 2.15 | 0.16 | 0.13 | 100.0 | 9.4       | 900  | 35  | 14  | 60  | 740  | 20  | 135 |
| TM 561                                         | 54.3 | 0.95 | 18.6  | 3.9981 | 4.29 | 3.17 | 6.51 | 4.45 | 2    | 0.43 | 0.16 | 0.91 | 0.07 | 0.07 | 99.9  | 8.8       | 700  | 50  | 18  | 33  | 770  | 34  | 200 |
| TM 789                                         | 54.8 | 1.18 | 16    | 3.4683 | 4.47 | 4.52 | 6.67 | 3.46 | 1.79 | 0.33 | 0.13 | 2.13 | 0.08 | 0.71 | 99.7  | 8.4       | 900  | 30  | 10  | 63  | 500  | 27  | 140 |
| TM 457                                         | 55.4 | 0.95 | 17.3  | 4.5155 | 3.95 | 3.74 | 6.94 | 3.16 | 1.99 | 0.29 | 0.13 | 1.19 | 0.07 | 0.11 | 99.7  | 8.9       | 750  | 50  | 13  | 39  | 690  | 28  | 180 |
| TM 449                                         | 73.0 | 0.21 | 13.7  | 0.74   | 0.94 | 0.46 | 1.71 | 3.33 | 4.28 | 0.06 | 0.02 | 0.35 | 0.02 | 0.1  | 98.9  | 1.8       | 1700 | 40  | <10 | 49  | 790  | 21  | 400 |
| TM 452                                         | 73.9 | 0.17 | 13.6  | 0.8018 | 0.62 | 0.35 | 1.46 | 3.26 | 4.74 | 0.05 | 0.04 | 0.28 | 0.01 | 0.08 | 99.4  | 1.5       | 1100 | 30  | 13  | 110 | 220  | 34  | 150 |
| TM 398                                         | 76.6 | 0.15 | 12.3  | 0.59   | 0.15 | 0.23 | 0.68 | 2.74 | 5.15 | 0.05 | 0.02 | 0.26 | 0.09 | 0.07 | 99.1  |           | 570  | 45  | 10  | 96  | 88   | 10  | 150 |
| Central Trigo Mts.                             |      |      |       |        |      |      |      |      |      |      |      |      |      |      |       |           |      |     |     |     |      |     |     |
| TM 408                                         | 52.3 | 0.77 | 17.6  | 3.5982 | 3.38 | 5.6  | 10.5 | 2.83 | 1.18 | 0.17 | 0.12 | 1.76 | 0.2  | 0.21 | 100.2 | 7.4       | 530  | 20  | 10  | 32  | 600  | 20  | 88  |
| 7 DT 1                                         | 59.3 | 0.7  | 17.5  | 3.1574 | 2.66 | 2.42 | 4.74 | 4.14 | 2.68 | 0.32 | 0.12 | 1.51 | 0.13 | 0.23 | 99.6  | 6.1       | 1400 | 34  | 10  | 56  | 730  | 18  | 210 |
| Southern Trigo Mts. and eastern Chocolate Mts. |      |      |       |        |      |      |      |      |      |      |      |      |      |      |       |           |      |     |     |     |      |     |     |
| PT 360                                         | 45.0 | 0.97 | 22.4  | 3.7581 | 4.29 | 5.44 | 14.6 | 1.76 | 0.26 | 0.06 | 0.09 | 1.61 | 0.06 | 0.15 | 100.4 | 8.5       | 240  | 40  | <10 | <10 | 810  | <10 | 44  |
| PT 280                                         | 45.7 | 0.96 | 17    | 3.6955 | 5.95 | 8.94 | 12.7 | 1.71 | 0.22 | 0.06 | 0.14 | 2.35 | 0.1  | 0.47 | 100.0 | 10.3      | 145  | 20  | 10  | 10  | 580  | 10  | 38  |
| PT 279                                         | 46.9 | 0.28 | 25.6  | 1.7258 | 3.22 | 5.57 | 12   | 2.58 | 0.34 | 0.05 | 0.06 | 1.86 | 0.11 | 0.13 | 100.4 | 5.3       | 185  | 20  | 10  | 20  | 800  | 10  | 30  |
| PT 383                                         | 51.8 | 1.42 | 16.2  | 4.3564 | 4.76 | 5.32 | 8.48 | 3.07 | 2.07 | 0.3  | 0.16 | 1.63 | 0.13 | 0.11 | 99.8  | 9.6       | 960  | 60  | 20  | 62  | 490  | 32  | 176 |
| PT 372                                         | 52.7 | 1.43 | 14.5  | 2.395  | 4.5  | 7.39 | 11   | 2.78 | 1.38 | 0.23 | 0.14 | 1.22 | 0.11 | 0.04 | 99.8  | 7.4       | 325  | <30 | 18  | 32  | 450  | 22  | 116 |
| PT367                                          | 60.3 | 0.69 | 17.6  | 3.1359 | 2.31 | 2.14 | 5.36 | 3.84 | 2.55 | 0.24 | 0.1  | 0.89 | 0.23 | 0.29 | 99.7  | 5.7       | 1400 | 46  | 10  | 70  | 560  | 28  | 230 |
| Cargo Muchacho Mts.                            |      |      |       |        |      |      |      |      |      |      |      |      |      |      |       |           |      |     |     |     |      |     |     |

|        |      |      |       |        |      |      |      |      |      |       |      |      |      |       |       |      |      |     |    |     |      |    |     |
|--------|------|------|-------|--------|------|------|------|------|------|-------|------|------|------|-------|-------|------|------|-----|----|-----|------|----|-----|
| AG 36  | 46.1 | 0.48 | 16    | 2.44   | 6.9  | 12.2 | 9.93 | 1.52 | 1.02 | 0.1   | 0.21 | 3.01 | 0.08 | 0.01  | 100.0 | 10.1 | 345  | 30  | 10 | 52  | 490  | 14 | 60  |
| AG 48  | 53.6 | 1.06 | 17.3  | 4.03   | 4.58 | 3.55 | 8.24 | 2.92 | 2.53 | 0.33  | 0.15 | 1.22 | 0.16 | 0.04  | 99.7  | 9.1  | 970  | 30  | 10 | 78  | 580  | 32 | 146 |
| AG 31  | 54.6 | 0.9  | 16.5  | 2.85   | 5.1  | 4.49 | 7.83 | 2.92 | 2.26 | 0.32  | 0.14 | 1.23 | 0.07 | 0.18  | 99.4  | 8.5  | 690  | 48  | 14 | 74  | 560  | 34 | 144 |
| 88-21* | 57.0 | 0.85 | 16.49 |        |      | 7.26 | 7.76 | 2.85 | 2.01 | 0.21  | 0.14 |      |      |       | 100.0 | 7.3  | 386  | 21  | 13 | 78  | 443  | 27 | 116 |
| AG 46  | 57.2 | 0.51 | 16.1  | 4.3    | 3.07 | 4.18 | 3.49 | 6.94 | 2.88 | 2.51  | 0.12 | 1.26 | 0.19 | 0.01  | 102.8 | 7.7  | 480  | 66  | 16 | 96  | 485  | 44 | 114 |
| 7 DT 7 | 58.7 | 0.23 | 15.9  | 2.67   | 4.29 | 3.88 | 6.36 | 2.76 | 2.97 | 0.76  | 0.12 | 0.87 | 0.18 | 0.05  | 99.7  | 7.4  | 660  | 48  | 10 | 102 | 435  | 34 | 186 |
| 88-7a* | 60.5 | 0.68 | 17.29 |        |      | 2.42 | 5.93 | 3.65 | 2.29 | 0.2   | 0.14 |      |      |       | 96.6  | 5.7  | 1008 | 31  | 13 | 68  | 534  | 21 | 160 |
| 88-22* | 62.1 | 0.71 | 16.93 |        |      | 2.59 | 5.22 | 3.18 | 3.46 | 0.22  | 0.14 |      |      |       | 97.0  | 5.7  | 992  | 24  | 18 | 109 | 424  | 32 | 171 |
| MC 1   | 62.3 | 0.71 | 15.5  | 2.19   | 3.41 | 2.27 | 4.87 | 2.91 | 3.47 | 0.24  | 0.1  | 0.84 | 0.12 | 0.22  | 99.2  | 6.0  | 1000 | 50  | 19 | 97  | 440  | 39 | 250 |
| PT 290 | 62.4 | 0.75 | 15    | 2.19   | 3.62 | 2.5  | 4.1  | 2.99 | 4.46 | 0.2   | 0.1  | 0.7  | 0.12 | 0.08  | 99.2  | 6.2  | 1050 | 45  | 20 | 170 | 360  | 38 | 310 |
| 88-5*  | 62.4 | 0.7  | 16.41 |        |      | 2.39 | 5.12 | 3.07 | 3.28 | 0.2   | 0.14 |      |      |       | 96.0  | 5.5  | 1127 | 30  | 18 | 107 | 543  | 30 | 182 |
| MC 289 | 62.7 | 0.74 | 15.4  | 2.38   | 3.16 | 2.44 | 4.63 | 2.98 | 4.1  | 0.22  | 0.1  | 0.67 | 0.09 | 0.01  | 99.6  | 5.9  | 950  | 48  | 18 | 154 | 360  | 44 | 290 |
| AG 30  | 63.6 | 0.56 | 16.1  | 2.33   | 2.4  | 1.91 | 4.62 | 3.22 | 3.69 | 0.18  | 0.08 | 0.65 | 0.07 | 0.11  | 99.5  | 5.0  | 940  | 72  | 16 | 114 | 435  | 34 | 172 |
| 7DT6   | 63.7 | 0.58 | 15.7  | 2.3    | 2.76 | 2.03 | 4.34 | 2.92 | 4.03 | 0.18  | 0.09 | 0.81 | 0.12 | 0.11  | 98.6  | 5.4  | 1000 | 42  | 12 | 102 | 430  | 44 | 190 |
| PT 291 | 63.7 | 0.55 | 15.7  | 2.07   | 2.57 | 1.78 | 4.31 | 3.06 | 4.05 | 0.23  | 0.11 | 0.77 | 0.03 | 0.16  | 99.1  | 4.9  | 900  | 62  | 15 | 120 | 410  | 36 | 280 |
| AG 4   | 63.9 | 0.57 | 15.2  | 2.0115 | 3.35 | 2.07 | 2.44 | 4.62 | 3.24 | 0.27  | 0.24 | 0.53 | 0.22 | <0.01 | 98.7  | 5.7  | 850  | 60  | 16 | 174 | 325  | 36 | 172 |
| AG 47  | 64.1 | 0.52 | 15.6  | 1.98   | 2.56 | 1.85 | 4.28 | 3.09 | 3.84 | 0.18  | 0.1  | 0.72 | 0.15 | 0.12  | 99.1  | 4.8  | 1000 | 48  | 12 | 140 | 425  | 30 | 146 |
| MC 44  | 65.2 | 0.58 | 15.3  | 1.66   | 3.2  | 1.95 | 2.98 | 3.33 | 3.61 | 0.18  | 0.16 | 0.88 | 0.11 | 0.05  | 99.2  | 5.2  | 1000 | 54  | 13 | 100 | 350  | 36 | 250 |
| MC 58  | 56.1 | 0.72 | 17    | 3.58   | 3.75 | 3.12 | 6.88 | 3.62 | 2.98 | 0.41  | 0.15 | 0.82 | 0.07 | 0.19  | 99.4  | 7.7  | 1400 | 48  | 10 | 84  | 960  | 26 | 110 |
| MC 290 | 63.6 | 0.45 | 15.8  | 2.1528 | 2.52 | 1.6  | 4.38 | 3.69 | 3.88 | 0.3   | 0.09 | 0.52 | 0.12 | 0.16  | 99.3  | 5.0  | 1000 | 50  | 12 | 160 | 850  | 22 | 154 |
| TUK 57 | 64.5 | 0.36 | 16    | 2.27   | 1.67 | 1.31 | 4.07 | 3.8  | 3.83 | 0.25  | 0.1  | 0.65 | 0.16 | 0.3   | 99.3  | 4.1  | 1000 | 38  | 14 | 96  | 860  | 24 | 118 |
| 7DT8   | 64.9 | 0.46 | 15.3  | 2.61   | 1.81 | 1.45 | 4.14 | 3.69 | 3.83 | 0.31  | 0.1  | 0.28 | 0.17 | 0.17  | 99.2  | 4.6  | 980  | 42  | 12 | 102 | 800  | 28 | 235 |
| MC 295 | 65.1 | 0.43 | 15.1  | 2.12   | 1.95 | 1.36 | 3.66 | 4.25 | 4.24 | 0.32  | 0.1  | 0.26 | 0.11 | 0.27  | 99.3  | 4.3  | 1100 | 32  | 14 | 120 | 1000 | 28 | 275 |
| MC 61  | 67.3 | 0.44 | 15.6  | 1.63   | 1.15 | 0.65 | 3.01 | 4.3  | 3.97 | 0.2   | 0.09 | 0.26 | 0.14 | 0.13  | 98.9  | 2.9  | 1250 | 60  | 18 | 93  | 930  | 30 | 200 |
| TUK 58 | 69.6 | 0.18 | 15.7  | 0.99   | 0.53 | 0.12 | 0.92 | 3.57 | 5.22 | <0.05 | 0.03 | 0.35 | 0.13 | 0.01  | 97.4  | 1.6  | 1200 | <30 | 14 | 140 | 980  | 20 | 126 |

#### Middle Camp porphyritic granodiorite

##### Dome Rock Mountains

|        |      |      |      |        |      |      |      |      |      |      |      |      |      |       |       |     |      |    |    |     |     |    |     |
|--------|------|------|------|--------|------|------|------|------|------|------|------|------|------|-------|-------|-----|------|----|----|-----|-----|----|-----|
| TM 791 | 63.0 | 0.37 | 18.5 | 2.84   | 1.33 | 1.03 | 4.4  | 4.75 | 1.81 | 0.15 | 0.02 | 0.85 | 0.04 | 0.07  | 99.2  | 4.3 | 1700 | 40 | 10 | 49  | 790 | 21 | 400 |
| TM 782 | 66.6 | 0.42 | 14.8 | 1.9224 | 1.16 | 1.05 | 2.35 | 3.36 | 4.88 | 0.17 | 0.07 | 0.94 | 0.09 | 1.24  | 99.1  | 3.2 | 800  | 40 | 13 | 230 | 220 | 30 | 250 |
| TM 908 | 67.3 | 0.44 | 14.9 | 3.7659 | 1.37 | 1.23 | 2.98 | 3.25 | 4.36 | 0.14 | 0.08 | 0.74 | 0.09 | <0.01 | 100.6 | 3.7 | 700  | 62 | 17 | 162 | 285 | 31 | 174 |
| TM 938 | 68.1 | 0.42 | 14.7 | 3.604  | 1.11 | 1.19 | 2.92 | 3.15 | 4.44 | 0.14 | 0.05 | 0.78 | 0.08 | <0.01 | 100.7 | 3.4 | 810  | 40 | 15 | 146 | 260 | 26 | 152 |
| TM 911 | 68.9 | 0.37 | 14.3 | 1.2939 | 1.02 | 0.99 | 2.69 | 3.06 | 4.52 | 0.12 | 0.08 | 0.71 | 0.09 | 0.14  | 98.3  | 3.0 | 840  | 51 | 14 | 150 | 255 | 23 | 160 |

##### Trigo Peaks

|        |      |      |      |        |      |      |      |      |      |      |      |      |      |      |      |     |      |    |    |     |     |    |     |
|--------|------|------|------|--------|------|------|------|------|------|------|------|------|------|------|------|-----|------|----|----|-----|-----|----|-----|
| TM 634 | 60.5 | 0.73 | 17.1 | 3.7659 | 2.31 | 2.29 | 5.02 | 3.88 | 2.52 | 0.25 | 0.12 | 0.92 | 0.08 | 0.07 | 99.6 | 6.3 | 650  | 60 | 16 | 94  | 440 | 26 | 260 |
| TM 653 | 60.0 | 0.76 | 17.1 | 3.604  | 2.6  | 2.33 | 5.29 | 3.46 | 3.12 | 0.25 | 0.1  | 0.56 | 0.08 | 0.03 | 99.3 | 6.5 | 1350 | 45 | 16 | 90  | 540 | 30 | 290 |
| TM 649 | 67.5 | 0.52 | 14.5 | 2.17   | 1.59 | 1.36 | 3.15 | 2.77 | 4.38 | 0.16 | 0.06 | 0.69 | 0.03 | 0.23 | 99.1 |     | 1050 | 45 | 14 | 100 | 370 | 22 | 195 |
| TM 635 | 70.0 | 0.43 | 14   | 1.83   | 1.12 | 1.07 | 2.69 | 2.96 | 4.28 | 0.12 | 0.04 | 0.46 | 0.07 | 0.12 | 99.2 |     | 960  | 70 | 12 | 115 | 330 | 22 | 190 |

##### Trigo Mountains

|        |      |      |      |        |      |      |      |      |      |      |      |      |      |      |      |     |      |    |    |    |     |    |     |
|--------|------|------|------|--------|------|------|------|------|------|------|------|------|------|------|------|-----|------|----|----|----|-----|----|-----|
| TM 558 | 61.3 | 0.72 | 17.1 | 3.0285 | 2.65 | 2.02 | 5.12 | 3.77 | 2.83 | 0.26 | 0.1  | 0.59 | 0.07 | 0.05 | 99.6 | 6.0 | 1100 | 40 | 16 | 96 | 490 | 34 | 275 |
| PT 285 | 61.3 | 0.75 | 16.6 | 2.95   | 2.7  | 2.22 | 5.07 | 3.59 | 3.04 | 0.24 | 0.09 | 0.76 | 0.09 | 0.14 | 99.5 | 6.0 | 1400 | 45 | 16 | 90 | 540 | 30 | 260 |

##### Mule Mountains

|        |      |      |      |      |      |      |      |      |      |      |      |      |      |      |      |     |      |    |    |     |     |    |     |
|--------|------|------|------|------|------|------|------|------|------|------|------|------|------|------|------|-----|------|----|----|-----|-----|----|-----|
| TUK 9  | 63.4 | 0.63 | 15.2 | 2.57 | 1.61 | 1.7  | 3.1  | 3.57 | 4.16 | 0.23 | 0.08 | 1.27 | 0.05 | 1.65 | 99.2 | 4.4 | 1400 | 40 | 16 | 140 | 288 | 26 | 216 |
| TUK 8  | 64.0 | 0.67 | 15.6 | 2.45 | 1.73 | 1.81 | 3.5  | 3.15 | 4.38 | 0.24 | 0.1  | 1.01 | 0.07 | 0.23 | 98.9 | 4.4 | 1600 | 41 | 17 | 170 | 408 | 32 | 250 |
| TM 228 | 67.6 | 0.48 | 14.8 | 2.02 | 1.37 | 1.27 | 3.19 | 2.79 | 4.48 | 0.15 | 0.06 | 0.66 | 0.13 | 0.15 | 99.2 | 3.5 | 1150 | 45 | 14 | 115 | 415 | 24 | 190 |
| TM 239 | 68.6 | 0.59 | 14.9 | 1.9  | 1.08 | 1.03 | 2.57 | 3.77 | 4.31 | 0.18 | 0.06 | 0.63 | 0.05 | 0.21 | 99.9 | 3.1 | 1300 | 70 | 20 | 150 | 360 | 33 | 300 |
| TM 238 | 69.1 | 0.7  | 13.6 | 1.84 | 2.31 | 0.81 | 1.71 | 2.85 | 4.89 | 0.18 | 0.08 | 0.6  | 0.06 | 0.06 | 98.8 | 4.4 | 1100 | 80 | 22 | 160 | 240 | 38 | 310 |
| TM 256 | 69.4 | 0.39 | 14.7 | 1.91 | 0.77 | 0.96 | 3.01 | 3.08 | 4.22 | 0.12 | 0.05 | 0.74 | 0.05 | 0.22 | 99.6 | 2.8 | 850  | 25 | 12 | 120 | 350 | 18 | 150 |

##### Little Maria Mountains

|      |      |     |      |      |      |      |     |     |     |      |      |      |     |      |      |     |     |    |    |     |     |    |     |
|------|------|-----|------|------|------|------|-----|-----|-----|------|------|------|-----|------|------|-----|-----|----|----|-----|-----|----|-----|
| 9DT1 | 66.8 | 0.5 | 15.1 | 2.31 | 1.66 | 1.33 | 3.2 | 3.5 | 3.9 | 0.16 | 0.06 | 0.85 | 0.1 | 0.42 | 99.9 | 3.8 | 850 | 62 | 12 | 164 | 360 | 32 | 192 |
|------|------|-----|------|------|------|------|-----|-----|-----|------|------|------|-----|------|------|-----|-----|----|----|-----|-----|----|-----|

##### Eagle Mountains

|       |      |      |      |      |      |      |      |     |      |      |      |      |      |      |      |     |      |    |    |    |     |    |     |
|-------|------|------|------|------|------|------|------|-----|------|------|------|------|------|------|------|-----|------|----|----|----|-----|----|-----|
| Eagle | 58.7 | 0.84 | 17.4 | 3.19 | 3.32 | 2.61 | 5.77 | 3.6 | 2.85 | 0.29 | 0.11 | 0.63 | 0.17 | 0.08 | 99.6 | 6.9 | 1300 | 43 | 14 | 75 | 540 | 27 | 250 |
|-------|------|------|------|------|------|------|------|-----|------|------|------|------|------|------|------|-----|------|----|----|----|-----|----|-----|

#### Gold Rock Ranch granite unit

##### Dome Rock Mountains

|        |      |      |      |        |      |      |      |      |      |       |       |      |      |       |       |     |     |     |    |     |     |    |     |
|--------|------|------|------|--------|------|------|------|------|------|-------|-------|------|------|-------|-------|-----|-----|-----|----|-----|-----|----|-----|
| TM-939 | 73.9 | 0.16 | 13.3 | 1.84   | 0.31 | 0.36 | 1    | 3.02 | 5.38 | <0.05 | 0.02  | 0.46 | 0.08 | 0.01  | 99.8  | 1.3 | 380 | <30 | 15 | 194 | 112 | 27 | 95  |
| TM-594 | 75.3 | 0.17 | 12.5 | 0.8483 | 0.47 | 0.36 | 0.84 | 2.61 | 5.59 | 0.05  | 0.02  | 0.39 | 0.03 | 0.13  | 99.3  | 1.4 | 400 | 40  | 15 | 250 | 130 | 25 | 110 |
| TUK-68 | 75.1 | 0.15 | 12.5 | 0.2048 | 0.32 | 0.26 | 0.64 | 2.77 | 5.58 | <0.05 | <0.02 | 0.41 | 0.13 | 0.18  | 98.2  | 0.6 | 270 | 54  | 24 | 194 | 79  | 28 | 87  |
| TM-909 | 75.5 | 0.16 | 12.5 | 1.9    | 0.33 | 0.32 | 1.32 | 2.93 | 5.04 | <0.05 | 0.02  | 0.44 | 0.08 | 0.07  | 100.6 | 1.4 | 335 | <30 | 14 | 178 | 91  | 26 | 88  |
| TM-910 | 75.6 | 0.14 | 12.4 | 2.02   | 0.23 | 0.23 | 0.8  | 2.82 | 5.47 | <0.05 | 0.02  | 0.33 | 0.06 | <0.01 | 100.1 | 1.0 | 275 | 35  | 17 | 210 | 74  | 24 | 77  |
| TM-912 | 77.2 | 0.11 | 12   | 1.91   | 0.12 | 0.14 | 0.74 | 2.84 | 5.47 | <0.05 | <0.02 | 0.24 | 0.07 | 0.05  | 100.9 | 0.7 | 98  | 32  | 14 | 196 | 47  | 15 | 77  |

##### Trigo Peaks

|        |      |      |      |        |      |      |      |      |      |      |      |      |      |      |      |     |      |     |    |     |     |    |     |
|--------|------|------|------|--------|------|------|------|------|------|------|------|------|------|------|------|-----|------|-----|----|-----|-----|----|-----|
| TM 651 | 70.2 | 0.31 | 15.5 | 1.2597 | 0.73 | 0.52 | 2.02 | 3.8  | 4.7  | 0.07 | 0.03 | 0.39 | 0.09 | 0.03 | 99.6 | 2.1 | 2100 | 45  | 10 | 140 | 410 | 26 | 270 |
| TM 653 | 72.0 | 0.34 | 13.7 | 1.2939 | 1.51 | 0.58 | 1.9  | 2.94 | 4.47 | 0.1  | 0.02 | 0.56 | 0.04 | 0.05 | 99.5 | 3.0 | 850  | 90  | 20 | 180 | 185 | 44 | 290 |
| TM 602 | 72.1 | 0.35 | 13.5 | 1.3141 | 0.69 | 0.42 | 0.93 | 2.73 | 6.51 | 0.09 | 0.02 | 0.42 | 0.08 | 0.1  | 99.3 | 2.1 | 750  | 180 | 50 | 310 | 110 | 84 | 260 |
| TM 646 | 73.4 | 0.23 | 13.5 | 1.074  | 0.6  | 0.52 | 1.66 | 3.27 | 4.36 | 0.07 | 0.04 | 0.31 | 0.06 | 0.12 | 99.2 | 1.7 | 1150 | 40  | 12 | 125 | 220 | 23 | 175 |

|         |      |      |      |        |      |      |      |      |      |      |      |      |      |      |      |     |      |    |    |     |     |    |     |
|---------|------|------|------|--------|------|------|------|------|------|------|------|------|------|------|------|-----|------|----|----|-----|-----|----|-----|
| TM 637  | 74.2 | 0.18 | 13   | 0.8915 | 0.35 | 0.29 | 1.06 | 2.81 | 5.37 | 0.05 | 0.02 | 0.38 | 0.16 | 0.06 | 98.8 | 1.3 | 980  | 40 | 24 | 170 | 125 | 30 | 190 |
| TM 415  | 74.3 | 0.19 | 13   | 1.0181 | 0.29 | 0.32 | 0.93 | 3.03 | 5.31 | 0.05 | 0.02 | 0.41 | 0.14 | 0.06 | 99.1 | 1.3 | 1050 | 80 | 22 | 170 | 150 | 36 | 195 |
| TM 647  | 74.1 | 0.22 | 13.1 | 0.8661 | 0.49 | 0.38 | 1.38 | 3.17 | 4.58 | 0.06 | 0.02 | 0.22 | 0.03 | 0.11 | 98.7 | 1.4 | 1100 | 40 | 16 | 120 | 190 | 24 | 180 |
| TM 636  | 75.7 | 0.14 | 12.4 | 0.8404 | 0.36 | 0.3  | 1.08 | 2.55 | 5.11 | 0.05 | 0.02 | 0.29 | 0.06 | 0.04 | 98.9 | 1.2 | 510  | 50 | 14 | 185 | 140 | 16 | 115 |
| TUK 34  | 75.8 | 0.17 | 12.5 | 0.7062 | 0.58 | 0.3  | 1.01 | 3.09 | 4.85 | 0.05 | 0.02 | 0.17 | 0.01 | 0.08 | 99.3 | 1.4 | 350  | 50 | 19 | 210 | 100 | 32 | 140 |
| TUK 36  | 76.0 | 0.12 | 12.5 | 0.6081 | 0.29 | 0.25 | 1.26 | 2.28 | 5.43 | 0.05 | 0.02 | 0.28 | 0.06 | 0.06 | 99.2 | 0.9 | 1100 | 58 | 10 | 110 | 310 | 14 | 84  |
| TM 636a | 76.7 | 0.11 | 12.2 | 0.7726 | 0.34 | 0.28 | 0.99 | 2.65 | 5.17 | 0.05 | 0.02 | 0.33 | 0.05 | 0.04 | 99.7 | 1.2 | 395  | 60 | 12 | 175 | 125 | 14 | 88  |

*Cargo Muchacho Mts*

|        |      |      |      |      |      |      |      |      |      |      |      |      |      |      |       |     |      |    |    |     |      |    |     |
|--------|------|------|------|------|------|------|------|------|------|------|------|------|------|------|-------|-----|------|----|----|-----|------|----|-----|
| MC 290 | 63.6 | 0.45 | 15.8 | 2.15 | 2.52 | 1.6  | 4.38 | 3.69 | 3.8  | 0.3  | 0.09 | 0.52 | 0.12 | 0.16 | 99.2  | 5.0 | 1000 | 50 | 12 | 160 | 850  | 22 | 154 |
| ag 4   | 63.8 | 0.57 | 16.2 | 2.01 | 3.35 | 2.07 | 2.44 | 4.62 | 3.24 | 0.27 | 0.24 | 0.53 | 0.22 | 0.01 | 99.6  | 5.7 | 850  | 60 | 16 | 174 | 325  | 36 | 172 |
| MC 291 | 63.9 | 0.69 | 15.2 | 1.97 | 2.99 | 2.11 | 4    | 2.97 | 4.53 | 0.19 | 0.09 | 0.52 | 0.13 | 0.02 | 99.3  | 5.3 | 1100 | 52 | 18 | 162 | 320  | 38 | 330 |
| AG 5   | 66.7 | 0.49 | 15.3 | 1.98 | 1.49 | 1.19 | 2.33 | 3.51 | 5.51 | 0.18 | 0.1  | 0.33 | 0.21 | 0.02 | 99.3  | 3.6 | 1300 | 34 | 18 | 182 | 360  | 32 | 235 |
| AG 7   | 67.1 | 0.49 | 14.8 | 2.13 | 1.28 | 1.25 | 2.67 | 3.41 | 5.3  | 0.15 | 0.07 | 0.41 | 0.21 | 0.23 | 99.5  | 3.6 | 1000 | 44 | 18 | 200 | 390  | 34 | 250 |
| MC 158 | 68.1 | 0.48 | 14.9 | 1.51 | 1.31 | 1.07 | 2.52 | 3.43 | 5.19 | 0.14 | 0.05 | 0.47 | 0.06 | 0.08 | 99.3  | 3.0 | 1000 | 72 | 20 | 188 | 310  | 32 | 285 |
| AG 34  | 68.2 | 0.37 | 15.3 | 2.19 | 0.74 | 0.59 | 2.26 | 4.19 | 4.48 | 0.19 | 0.02 | 0.42 | 0.07 | 0.13 | 99.2  | 3.0 | 1300 | 46 | 10 | 174 | 1100 | 16 | 164 |
| MC 174 | 68.7 | 0.45 | 14.6 | 1.78 | 1.12 | 1.02 | 2.17 | 3.3  | 5.38 | 0.12 | 0.06 | 0.45 | 0.08 | 0.32 | 99.6  | 3.0 | 840  | 42 | 22 | 220 | 245  | 38 | 265 |
| AG 45  | 69.0 | 0.44 | 14.3 | 2.16 | 0.78 | 0.99 | 1.92 | 3.3  | 5.29 | 0.15 | 0.06 | 0.49 | 0.21 | 0.2  | 99.3  | 3.0 | 950  | 64 | 20 | 200 | 265  | 38 | 285 |
| AG 37  | 69.2 | 0.32 | 15.1 | 2.03 | 0.49 | 0.85 | 2.73 | 3.74 | 4.42 | 0.11 | 0.06 | 0.15 | 0.02 | 0.01 | 99.2  | 2.6 | 390  | 60 | 16 | 235 | 112  | 24 | 80  |
| MC 90  | 69.7 | 0.58 | 15.2 | 0.94 | 1.31 | 0.4  | 2.2  | 3.5  | 5.41 | 0.13 | 0.07 | 0.29 | 0.19 | 0.03 | 100.0 | 2.4 | 1000 | 70 | 30 | 240 | 240  | 54 | 470 |
| AG 16  | 69.9 | 0.35 | 14.4 | 1.09 | 0.85 | 0.62 | 1.39 | 3.2  | 6.18 | 0.06 | 0.05 | 0.29 | 0.25 | 0.29 | 98.9  | 2.0 | 790  | 58 | 24 | 235 | 144  | 40 | 295 |
| MC 57  | 69.9 | 0.22 | 16   | 0.83 | 0.51 | 0.4  | 2.34 | 5    | 3.82 | 0.09 | 0.03 | 0.19 | 0.16 | 0.15 | 99.6  | 1.4 | 1200 | 30 | 17 | 140 | 920  | 20 | 150 |
| MC 185 | 70.2 | 0.42 | 14.6 | 1.11 | 1.18 | 0.67 | 1.71 | 3.34 | 5.6  | 0.09 | 0.05 | 0.25 | 0.06 | 0.01 | 99.3  | 2.4 | 1000 | 56 | 24 | 225 | 210  | 46 | 310 |
| MC 34  | 70.2 | 0.43 | 14.7 | 1.46 | 0.76 | 0.51 | 1.55 | 3.7  | 5.2  | 0.08 | 0.09 | 0.29 | 0.08 | 0.03 | 99.1  | 2.3 | 790  | 70 | 28 | 270 | 184  | 64 | 405 |
| AG 3   | 70.4 | 0.35 | 14.7 | 1.13 | 0.99 | 0.5  | 1.11 | 3.08 | 6.79 | 0.07 | 0.05 | 0.21 | 0.03 | 0.01 | 99.4  | 2.2 | 1000 | 62 | 22 | 260 | 188  | 38 | 235 |
| MC 252 | 70.8 | 0.38 | 14.8 | 1.29 | 0.71 | 0.57 | 1.3  | 3.71 | 5.62 | 0.08 | 0.03 | 0.22 | 0.08 | 0.01 | 99.6  | 2.1 | 1200 | 46 | 22 | 270 | 235  | 42 | 305 |
| AG 25  | 71.0 | 0.37 | 14.1 | 1.1  | 0.94 | 0.61 | 1.38 | 3.06 | 6.07 | 0.06 | 0.05 | 0.22 | 0.27 | 0.01 | 99.2  | 2.1 | 750  | 62 | 22 | 250 | 162  | 40 | 280 |
| MC 2   | 71.4 | 0.33 | 14.2 | 1.14 | 0.89 | 0.51 | 1.52 | 3.38 | 5.17 | 0.09 | 0.03 | 0.38 | 0.09 | 0.11 | 99.2  | 2.1 | 1100 | 34 | 27 | 190 | 230  | 33 | 350 |
| MC 107 | 71.8 | 0.34 | 13.9 | 1.04 | 0.52 | 0.45 | 1.17 | 2.98 | 6.58 | 0.06 | 0.02 | 0.2  | 0.06 | 0.04 | 99.2  | 1.6 | 1000 | 70 | 22 | 275 | 235  | 52 | 330 |
| AG 44  | 71.9 | 0.35 | 14.1 | 1    | 0.62 | 0.34 | 1.25 | 2.82 | 6.72 | 0.05 | 0.02 | 0.17 | 0.03 | 0.01 | 99.4  | 1.7 | 860  | 80 | 22 | 235 | 128  | 42 | 335 |
| MC 54  | 72.0 | 0.04 | 15.4 | 0.17 | 0.3  | 0.2  | 1.88 | 3.1  | 5.94 | 0.02 | 0.23 | 0.06 | 0.21 | 0.06 | 99.6  | 0.5 | 900  | 30 | 65 | 140 | 510  | 52 | 70  |
| MC 145 | 72.6 | 14.9 | 0.8  | 0.64 | 0.77 | 1.83 | 6.38 | 0.91 | 0.37 | 0.07 | 0.04 | 0.14 | 0.08 | 0.01 | 99.5  | 1.5 | 118  | 66 | 22 | 82  | 370  | 38 | 295 |
| AG 32  | 72.8 | 0.19 | 13.7 | 1    | 0.71 | 0.63 | 1.83 | 2.83 | 4.91 | 0.06 | 0.02 | 0.57 | 0.13 | 0.01 | 99.4  | 1.8 | 680  | 36 | 10 | 152 | 265  | 18 | 120 |
| AG 49  | 73.0 | 0.22 | 13.7 | 0.94 | 0.61 | 0.51 | 1.92 | 2.86 | 4.98 | 0.05 | 0.02 | 0.18 | 0.12 | 0.01 | 99.1  | 1.6 | 580  | 38 | 18 | 174 | 210  | 36 | 90  |
| AG 33  | 73.3 | 0.18 | 13.7 | 0.87 | 0.54 | 0.52 | 1.92 | 2.83 | 5.07 | 0.05 | 0.02 | 0.26 | 0.06 | 0.06 | 99.4  | 1.5 | 820  | 62 | 12 | 184 | 245  | 26 | 90  |
| MC 35  | 73.6 | 0.05 | 14.4 | 0.63 | 0.21 | 0.16 | 1.5  | 4.29 | 3.8  | 0.05 | 0.02 | 0.16 | 0.04 | 0.06 | 99.0  | 0.9 | 220  | 30 | 12 | 170 | 190  | 17 | 66  |
| MC 56  | 73.8 | 0.03 | 14.9 | 0.14 | 0.14 | 0.2  | 1.31 | 4.1  | 5.33 | 0.03 | 0.2  | 0.05 | 0.02 | 0.07 | 99.9  | 0.3 | 140  | 30 | 97 | 280 | 75   | 60 | 60  |
| PT 289 | 74.3 | 0.24 | 13.1 | 0.68 | 0.47 | 0.3  | 1.19 | 3.2  | 5.18 | 0.05 | 0.02 | 0.3  | 0.02 | 0.15 | 99.2  | 1.2 | 440  | 55 | 34 | 230 | 120  | 35 | 190 |
| PT 295 | 74.8 | 0.23 | 12.8 | 0.83 | 0.67 | 0.35 | 0.99 | 3.03 | 5.16 | 0.05 | 0.02 | 0.2  | 0.01 | 0.07 | 99.2  | 1.6 | 600  | 70 | 12 | 180 | 160  | 24 | 190 |
| AG 2   | 74.9 | 0.02 | 14.3 | 0.38 | 0.13 | 0.1  | 1.28 | 4.87 | 3.09 | 0.05 | 0.51 | 0.05 | 0.01 | 0.01 | 99.7  | 0.5 | 68   | 36 | 22 | 200 | 44   | 88 | 74  |
| TUK 34 | 75.8 | 0.17 | 12.5 | 0.71 | 0.58 | 0.3  | 1.01 | 3.09 | 4.85 | 0.05 | 0.02 | 0.17 | 0.01 | 0.08 | 99.3  | 1.4 | 350  | 50 | 19 | 210 | 100  | 32 | 140 |
| AG 35  | 76.3 | 0.13 | 12.4 | 0.62 | 0.37 | 0.3  | 0.99 | 2.75 | 5.27 | 0.05 | 0.02 | 0.17 | 0.03 | 0.01 | 99.4  | 1.0 | 300  | 54 | 20 | 245 | 114  | 44 | 84  |
| AG 40  | 76.4 | 0.1  | 12.5 | 0.52 | 0.2  | 0.21 | 0.98 | 2.45 | 5.92 | 0.05 | 0.02 | 0.1  | 0.01 | 0.01 | 99.5  | 0.7 | 500  | 34 | 14 | 225 | 210  | 18 | 84  |
| AG 38  | 76.9 | 0.15 | 12   | 0.69 | 0.48 | 0.33 | 0.92 | 2.95 | 4.79 | 0.05 | 0.02 | 0.14 | 0.01 | 0.14 | 99.6  | 1.2 | 365  | 30 | 12 | 240 | 114  | 20 | 92  |
| AG 29  | 77.0 | 0.06 | 12.6 | 0.46 | 0.2  | 0.12 | 1    | 2.87 | 5.23 | 0.05 | 0.02 | 0.08 | 0.01 | 0.01 | 99.7  | 0.7 | 126  | 52 | 12 | 196 | 100  | 10 | 46  |

**DIKE SWARM**

*Mule Mountains*

|        |      |      |      |      |      |      |      |      |      |      |      |      |      |      |       |      |      |    |     |     |     |    |     |
|--------|------|------|------|------|------|------|------|------|------|------|------|------|------|------|-------|------|------|----|-----|-----|-----|----|-----|
| TM 250 | 44.3 | 2.1  | 13.3 | 5.5  | 3.91 | 3.02 | 14.4 | 3.28 | 0.7  | 0.57 | 0.31 | 2    | 0.11 | 6.49 | 100.0 | 9.8  | 260  | 30 | 10  | 52  | 460 | 40 | 270 |
| TUK 1  | 48.1 | 2.56 | 16.6 | 9.02 | 6.31 | 3.86 | 4.94 | 4.49 | 2.32 | 0.43 | 0.31 | 2.5  | 0.11 | 1.01 | 102.6 | 13.3 | 370  | 30 | 10  | 138 | 360 | 30 | 195 |
| 9DT10  | 48.2 | 1.67 | 17.8 | 3.33 | 6.1  | 5.67 | 9.36 | 3.17 | 0.99 | 0.32 | 0.15 | 2.56 | 0.22 | 0.25 | 99.8  | 10.1 | 450  | 30 | <10 | 24  | 440 | 28 | 194 |
| TM 255 | 48.5 | 2.1  | 16.4 | 6.8  | 5.77 | 4.24 | 5.07 | 4.12 | 2.45 | 0.39 | 0.31 | 2.21 | 0.17 | 1.04 | 99.6  | 13.2 | 470  | 30 | <10 | 134 | 355 | 28 | 186 |
| TM 252 | 50.8 | 1.27 | 17.4 | 2.01 | 7.09 | 6.47 | 2.78 | 5.47 | 1.37 | 0.5  | 0.23 | 3.45 | 0.15 | 0.88 | 99.9  | 9.9  | 180  | 60 | 10  | 82  | 110 | 28 | 200 |
| TUK 12 | 51.3 | 1.34 | 17.2 | 4.3  | 3.58 | 5.04 | 8.17 | 3.53 | 1.89 | 0.49 | 0.11 | 1.71 | 0.26 | 0.1  | 99.0  | 8.3  | 1200 | 14 | 19  | 42  | 940 | 20 | 180 |

*Central Trigo Mountains*

|        |      |      |      |      |      |      |      |      |      |      |      |      |      |      |      |     |      |    |    |    |     |    |     |
|--------|------|------|------|------|------|------|------|------|------|------|------|------|------|------|------|-----|------|----|----|----|-----|----|-----|
| TUK 26 | 69.6 | 0.48 | 14.8 | 1.74 | 0.61 | 0.59 | 1.58 | 4.47 | 4.26 | 0.07 | 0.03 | 0.54 | 0.05 | 0.22 | 99.0 | 2.4 | 1250 | 50 | 28 | 65 | 180 | 48 | 400 |
|--------|------|------|------|------|------|------|------|------|------|------|------|------|------|------|------|-----|------|----|----|----|-----|----|-----|

Analytical methods: major elements—wavelength-dispersive x-ray fluorescence (Taggart et al., 1987); FeO, H<sub>2</sub>O, CO<sub>2</sub> (Jackson et al., 1987); Rb—energy-dispersive x-ray trace elements by energy dispersive x-ray fluorescence (Johnson and King, 1987) or direct-current-arc quantitative emission spectrometry (Golightly et al., 1987)

\* Analytical data from Hayes (1992); only total Fe concentration and LOI reported.

Table DR2. U-Pb thermal ionization mass spectrometry (TIMS) geochronologic data for zircon and sphene from Jurassic volcanic and plutonic rocks, lower Colorado River region, Arizona and California. Sample locations are UTM WGS84.

| Mineral                                          | $^{206}\text{Pb}^*$ (ppm) | $^{238}\text{U}$ (ppm) | $^{206}\text{Pb}/^{204}\text{Pb}$ | $^{206}\text{Pb}/^{238}\text{U}^\dagger$ | $^{207}\text{Pb}/^{235}\text{U}^\dagger$ | $^{207}\text{Pb}/^{206}\text{Pb}^\dagger$ | $^{206}\text{Pb}/^{238}\text{U}$ age | $^{207}\text{Pb}/^{235}\text{U}$ age | $^{207}\text{Pb}/^{206}\text{Pb}$ age |
|--------------------------------------------------|---------------------------|------------------------|-----------------------------------|------------------------------------------|------------------------------------------|-------------------------------------------|--------------------------------------|--------------------------------------|---------------------------------------|
| <i>Araz Wash diorite unit</i>                    |                           |                        |                                   |                                          |                                          |                                           |                                      |                                      |                                       |
| PT 291: 11S 709224E / 3632967N                   |                           |                        |                                   |                                          |                                          |                                           |                                      |                                      |                                       |
| zircon                                           | 15.9                      | 672                    | 1053                              | 0.027317                                 | 0.19062                                  | 0.050611                                  | 173.7                                | 177.2                                | 223                                   |
|                                                  | 20.2                      | 863                    | 2119                              | 0.027107                                 | 0.18693                                  | 0.050014                                  | 172.4                                | 174                                  | 196                                   |
|                                                  | 20.4                      | 876                    | 2198                              | 0.026874                                 | 0.18536                                  | 0.050024                                  | 171                                  | 172.7                                | 196                                   |
| TUK 57: 11S 71222E / 3634434N                    |                           |                        |                                   |                                          |                                          |                                           |                                      |                                      |                                       |
| zircon                                           | 14.6                      | 573                    | 1842                              | 0.029461                                 | 0.21711                                  | 0.053448                                  | 187.2                                | 199.5                                | 348                                   |
|                                                  | 14.7                      | 577                    | 1639                              | 0.029415                                 | 0.21591                                  | 0.053235                                  | 186.9                                | 198.5                                | 339                                   |
|                                                  | 13.9                      | 551                    | 1560                              | 0.029196                                 | 0.21347                                  | 0.053029                                  | 185.5                                | 196.5                                | 330                                   |
|                                                  | 18.2                      | 742                    | 2278                              | 0.028273                                 | 0.20675                                  | 0.053036                                  | 179.7                                | 190.8                                | 330                                   |
| sphene                                           | 8.8                       | 167                    | 198                               | 0.02617                                  | 0.17859                                  | 0.049493                                  | 166.5                                | 166.8                                | 171                                   |
| TUK 58: 11S 712292E / 3634247N                   |                           |                        |                                   |                                          |                                          |                                           |                                      |                                      |                                       |
| zircon                                           | 67.8                      | 734                    | 7594                              | 0.106766                                 | 0.31085                                  | 0.089987                                  | 653.9                                | 850.5                                | 1405                                  |
|                                                  | 66.7                      | 724                    | 7541                              | 0.106456                                 | 1.3248                                   | 0.90256                                   | 652.1                                | 856.6                                | 1430                                  |
|                                                  | 48.3                      | 594                    | 3846                              | 0.093904                                 | 1.13645                                  | 0.087773                                  | 578.6                                | 770.8                                | 1378                                  |
|                                                  | 43.9                      | 609                    | 7092                              | 0.083212                                 | 0.98535                                  | 0.085883                                  | 515.3                                | 696.3                                | 1336                                  |
| <i>Middle Camp porphyritic granodiorite unit</i> |                           |                        |                                   |                                          |                                          |                                           |                                      |                                      |                                       |
| TUK 73: 11S 725988E / 368672N                    |                           |                        |                                   |                                          |                                          |                                           |                                      |                                      |                                       |
| zircon                                           | 14.4                      | 635                    | 1235                              | 0.026217                                 | 0.18102                                  | 0.050078                                  | 166.8                                | 168.9                                | 199                                   |
|                                                  | 11.3                      | 495                    | 2000                              | 0.026283                                 | 0.18213                                  | 0.050262                                  | 167.2                                | 169.9                                | 207                                   |
|                                                  | 13.4                      | 591                    | 1773                              | 0.026141                                 | 0.17944                                  | 0.049784                                  | 166.4                                | 167.6                                | 185                                   |
| TUK 37: 11S 776810E / 3706329N                   |                           |                        |                                   |                                          |                                          |                                           |                                      |                                      |                                       |
| zircon                                           | 14.5                      | 642                    | 4348                              | 0.026173                                 | 0.18189                                  | 0.050403                                  | 166.6                                | 169.7                                | 214                                   |
|                                                  | 14.6                      | 634                    | 813                               | 0.026585                                 | 0.18398                                  | 0.050193                                  | 169.1                                | 171.5                                | 204                                   |
|                                                  | 14.4                      | 640                    | 5760                              | 0.02608                                  | 0.17902                                  | 0.049782                                  | 166                                  | 167.2                                | 185                                   |
|                                                  | 15.1                      | 671                    | 3968                              | 0.026271                                 | 0.18082                                  | 0.049918                                  | 167.2                                | 168.8                                | 191                                   |
| TUK 31: 12S 229509E / 3680194N                   |                           |                        |                                   |                                          |                                          |                                           |                                      |                                      |                                       |
| zircon                                           | 12.5                      | 559                    | 2653                              | 0.02902                                  | 0.17863                                  | 0.049789                                  | 165.6                                | 166.9                                | 185                                   |
|                                                  | 11.8                      | 524                    | 2786                              | 0.026021                                 | 0.17699                                  | 0.049331                                  | 165.6                                | 165.5                                | 164                                   |
|                                                  | 13                        | 581                    | 2825                              | 0.025835                                 | 0.17695                                  | 0.049677                                  | 164.2                                | 165.4                                | 180                                   |
|                                                  | 11.8                      | 534                    | 1536                              | 0.025591                                 | 0.17398                                  | 0.049309                                  | 162.9                                | 162.9                                | 163                                   |
|                                                  | 12.3                      | 557                    | 2070                              | 0.025601                                 | 0.17475                                  | 0.049506                                  | 163                                  | 163.5                                | 172                                   |
| TUK 8: 11S 705020E / 3712010N                    |                           |                        |                                   |                                          |                                          |                                           |                                      |                                      |                                       |
| zircon                                           | 8.6                       | 381                    | 1085                              | 0.026108                                 | 0.17914                                  | 0.049766                                  | 166.1                                | 167.3                                | 186                                   |
|                                                  | 4.9                       | 219                    | 774                               | 0.025954                                 | 0.17685                                  | 0.049385                                  | 165.2                                | 165.3                                | 168                                   |

|        |      |     |      |          |         |          |       |       |     |
|--------|------|-----|------|----------|---------|----------|-------|-------|-----|
|        | 8.8  | 393 | 826  | 0.025964 | 0.17948 | 0.050134 | 165.2 | 167.6 | 201 |
|        | 8.5  | 378 | 1176 | 0.026042 | 0.17987 | 0.050095 | 165.7 | 168   | 199 |
|        | 10.6 | 473 | 1333 | 0.02577  | 0.17738 | 0.04992  | 164   | 165.8 | 191 |
|        | 10.5 | 471 | 1637 | 0.025852 | 0.18046 | 0.050628 | 164.5 | 168.5 | 224 |
|        | 8    | 357 | 1330 | 0.025745 | 0.17811 | 0.050176 | 163.9 | 166.4 | 203 |
|        | 11.7 | 561 | 371  | 0.024094 | 0.16674 | 0.050191 | 153.5 | 156.6 | 204 |
| sphene | 4.6  | 209 | 126  | 0.025661 | 0.17352 |          | 163.3 | 162.5 |     |

*Gold Rock Ranch Granite unit*

*TUK19: 11S 697707E / 3705739N*

|        |      |      |      |         |         |          |       |       |      |
|--------|------|------|------|---------|---------|----------|-------|-------|------|
| zircon | 35.9 | 439  | 6301 | 0.09429 | 1.0856  | 0.083506 | 580.8 | 746.4 | 1281 |
|        | 40   | 545  | 4255 | 0.08481 | 0.96838 | 0.082816 | 524.7 | 687.6 | 1264 |
|        | 51.4 | 697  | 3788 | 0.08515 | 0.99201 | 0.8449   | 526.8 | 699.7 | 1303 |
|        | 31.3 | 834  | 1845 | 0.04339 | 0.41711 | 0.06972  | 273.8 | 354   | 920  |
|        | 40.4 | 1792 | 974  | 0.026   | 0.1812  | 0.05054  | 165.5 | 169.1 | 220  |
|        | 42.4 | 1843 | 1663 | 0.02655 | 0.18732 | 0.051176 | 168.9 | 174.3 | 248  |
|        | 28.7 | 1364 | 4367 | 0.02429 | 0.17016 | 0.0508   | 154.7 | 159.6 | 232  |
|        | 25.9 | 1114 | 272  | 0.02685 | 0.18764 | 0.05069  | 170.8 | 174.6 | 227  |

*TUK 72: 11S 700729E / 3706166N*

|        |      |     |     |         |         |         |       |       |     |
|--------|------|-----|-----|---------|---------|---------|-------|-------|-----|
| zircon | 14.7 | 593 | 756 | 0.02886 | 0.21693 | 0.05501 | 181.8 | 199.4 | 413 |
|        | 13.3 | 565 | 943 | 0.02712 | 0.19845 | 0.05307 | 172.5 | 183.8 | 332 |
|        | 18.3 | 791 | 891 | 0.02674 | 0.19156 | 0.05196 | 170.1 | 178   | 283 |

*TUK 36: 11S 745444E / 3704635N*

|        |      |      |      |          |         |          |       |       |     |
|--------|------|------|------|----------|---------|----------|-------|-------|-----|
| zircon | 24.6 | 1134 | 1242 | 0.024932 | 0.16989 | 0.049422 | 158.7 | 159.3 | 168 |
|        | 30.6 | 1421 | 1238 | 0.027843 | 0.16841 | 0.049166 | 158.2 | 158   | 156 |

*Dike swarm*

*TUK 26: 11S 724801E / 3688046N*

|        |     |     |     |          |         |          |       |       |     |
|--------|-----|-----|-----|----------|---------|----------|-------|-------|-----|
| zircon | 3.7 | 177 | 832 | 0.024825 | 0.16828 | 0.049159 | 158.1 | 157.9 | 155 |
|        | 3.6 | 166 | 976 | 0.024881 | 0.16904 | 0.049273 | 158.4 | 158.6 | 161 |

\* Denotes radiogenic  $^{206}\text{Pb}$ . Sample dissolution and ion exchange chemistry modified from Krogh (1973) and Mattinson (1987). U-Pb analyses completed in the U.S. Geological Survey laboratory in Menlo Park prior to 1990.

† Measured ratios are corrected for 0.125% per unit mass fractionation, based on replicate analyses of NBS 981 and 983, for laboratory procedural blank of 0.2 nanograms of Pb, and corrected for common Pb ratios based upon measured feldspar Pb isotopic compositions.

Atomic ratios calculated using the following constants:  $^{238}\text{U}/^{235}\text{U}=137.88$ ;  $^{235}\text{U}=0.98485 \times 10^{-9}\text{yr}^{-1}$ ;  $^{238}\text{U}=0.155125 \times 10^{-9}\text{yr}^{-1}$ .

Table DR3. U-Pb SHRIMP-RG data for volcanic and plutonic rocks from the lower Colorado River region, Arizona and California. Sample locations are in UTM WGS84.

| Spot                           | U, ppm | Th, ppm | <sup>232</sup> Th/ <sup>238</sup> U | Rad 206Pb, ppm | 206Pb/ <sup>238</sup> U age | 1σ unc. | Total <sup>238</sup> U/ <sup>206</sup> Pb | % unc. | Total <sup>207</sup> Pb/ <sup>206</sup> Pb | % unc. | 207Pb/ <sup>235</sup> U | % unc. | 206Pb/ <sup>238</sup> U | % unc. | rho  |
|--------------------------------|--------|---------|-------------------------------------|----------------|-----------------------------|---------|-------------------------------------------|--------|--------------------------------------------|--------|-------------------------|--------|-------------------------|--------|------|
| <i>Dome Rock sequence</i>      |        |         |                                     |                |                             |         |                                           |        |                                            |        |                         |        |                         |        |      |
| TUK 46: 11S 703418E / 3639140N |        |         |                                     |                |                             |         |                                           |        |                                            |        |                         |        |                         |        |      |
| 1                              | 522    | 143     | 0.28                                | 13.2           | 187.4                       | 1.5     | 34.01                                     | 0.8    | 0.0474                                     | 1.8    | 0.182                   | 3.0    | 0.0293                  | 0.8    | 0.28 |
| 2                              | 336    | 124     | 0.38                                | 8.5            | 186.6                       | 1.7     | 34.13                                     | 0.9    | 0.0481                                     | 2.2    | 0.198                   | 2.7    | 0.0293                  | 0.9    | 0.34 |
| 3                              | 386    | 57      | 0.15                                | 9.5            | 180.6                       | 1.6     | 35.11                                     | 0.9    | 0.0518                                     | 2.1    | 0.206                   | 2.3    | 0.0285                  | 0.9    | 0.38 |
| 4                              | 103    | 38      | 0.38                                | 27.9           | 1772.0                      | 20.9    | 3.16                                      | 1.2    | 0.1080                                     | 1.9    | 4.667                   | 2.3    | 0.3159                  | 1.2    | 0.51 |
| 5                              | 267    | 68      | 0.26                                | 7.2            | 196.7                       | 2.5     | 31.97                                     | 1.3    | 0.0577                                     | 3.0    | 0.242                   | 3.8    | 0.0312                  | 1.3    | 0.34 |
| 6                              | 562    | 253     | 0.46                                | 15.9           | 209.0                       | 2.0     | 30.36                                     | 1.0    | 0.0501                                     | 2.1    | 0.228                   | 2.3    | 0.0329                  | 1.0    | 0.42 |
| 7                              | 192    | 85      | 0.46                                | 4.8            | 184.8                       | 2.4     | 34.36                                     | 1.3    | 0.0503                                     | 3.7    | 0.194                   | 4.8    | 0.0290                  | 1.3    | 0.27 |
| 8                              | 329    | 196     | 0.62                                | 90.1           | 1797.9                      | 16.5    | 3.14                                      | 0.9    | 0.1035                                     | 2.1    | 4.542                   | 2.3    | 0.3189                  | 0.9    | 0.39 |
| 9                              | 63     | 41      | 0.67                                | 1.6            | 187.1                       | 4.0     | 33.72                                     | 2.1    | 0.0553                                     | 9.3    | 0.089                   | 65.6   | 0.0285                  | 2.7    | 0.04 |
| 10                             | 105    | 59      | 0.58                                | 29.8           | 1859.0                      | 23.7    | 3.03                                      | 1.2    | 0.1031                                     | 2.1    | 4.652                   | 2.5    | 0.3293                  | 1.2    | 0.50 |
| 11                             | 338    | 78      | 0.24                                | 8.3            | 181.8                       | 3.9     | 35.00                                     | 2.2    | 0.0489                                     | 3.4    | 0.175                   | 6.2    | 0.0284                  | 2.2    | 0.35 |
| 12                             | 183    | 127     | 0.72                                | 49.8           | 1801.3                      | 21.8    | 3.15                                      | 1.2    | 0.0976                                     | 2.9    | 4.186                   | 3.2    | 0.3164                  | 1.2    | 0.36 |
| 13                             | 1006   | 46      | 0.05                                | 26.4           | 194.0                       | 1.7     | 32.73                                     | 0.9    | 0.0502                                     | 1.9    | 0.211                   | 2.1    | 0.0306                  | 0.9    | 0.41 |
| 14                             | 138    | 127     | 0.95                                | 3.6            | 189.3                       | 3.9     | 33.45                                     | 2.1    | 0.0527                                     | 5.5    | 0.217                   | 5.8    | 0.0299                  | 2.1    | 0.35 |
| 15                             | 2965   | 375     | 0.13                                | 873.6          | 1933.3                      | 37.5    | 2.92                                      | 1.9    | 0.1037                                     | 0.2    | 4.899                   | 1.9    | 0.3429                  | 1.9    | 0.99 |
| TUK 81: 11S 713127E / 3636259N |        |         |                                     |                |                             |         |                                           |        |                                            |        |                         |        |                         |        |      |
| 1                              | 224    | 82      | 0.38                                | 5.5            | 180.9                       | 2.0     | 35.15                                     | 1.1    | 0.0494                                     | 3.6    | 0.190                   | 3.8    | 0.0284                  | 1.1    | 0.28 |
| 2                              | 255    | 105     | 0.43                                | 6.3            | 183.8                       | 1.8     | 34.59                                     | 0.9    | 0.0496                                     | 3.2    | 0.190                   | 4.3    | 0.0288                  | 1.0    | 0.22 |
| 3                              | 284    | 97      | 0.35                                | 7.3            | 189.1                       | 1.7     | 33.59                                     | 0.9    | 0.0498                                     | 3.0    | 0.200                   | 3.1    | 0.0298                  | 0.9    | 0.29 |
| 4                              | 637    | 241     | 0.39                                | 16.6           | 192.5                       | 1.2     | 32.94                                     | 0.6    | 0.0513                                     | 2.0    | 0.210                   | 2.5    | 0.0303                  | 0.6    | 0.24 |
| 5                              | 281    | 91      | 0.33                                | 7.1            | 188.1                       | 1.8     | 33.79                                     | 0.9    | 0.0494                                     | 3.2    | 0.200                   | 3.6    | 0.0296                  | 0.9    | 0.26 |
| 6                              | 215    | 71      | 0.34                                | 5.4            | 184.8                       | 2.0     | 34.31                                     | 1.1    | 0.0516                                     | 5.1    | 0.210                   | 5.2    | 0.0291                  | 1.1    | 0.21 |
| 7                              | 80     | 89      | 1.15                                | 16.3           | 1374.1                      | 14.3    | 4.19                                      | 1.1    | 0.0908                                     | 1.5    | 2.950                   | 1.9    | 0.2383                  | 1.1    | 0.55 |
| 8                              | 2392   | 415     | 0.18                                | 504.0          | 1414.7                      | 3.1     | 4.08                                      | 0.2    | 0.0892                                     | 0.3    | 3.010                   | 0.4    | 0.2453                  | 0.2    | 0.63 |
| 9                              | 128    | 62      | 0.50                                | 25.9           | 1344.0                      | 11.1    | 4.27                                      | 0.8    | 0.0949                                     | 1.4    | 3.030                   | 1.8    | 0.2341                  | 0.8    | 0.47 |
| 10                             | 39     | 11      | 0.30                                | 0.8            | 140.4                       | 3.8     | 44.56                                     | 2.7    | 0.0643                                     | 8.2    | 0.200                   | 8.6    | 0.0224                  | 2.7    | 0.31 |
| 11                             | 844    | 102     | 0.12                                | 152.4          | 1198.0                      | 5.0     | 4.76                                      | 0.4    | 0.1020                                     | 1.2    | 2.950                   | 1.2    | 0.2101                  | 0.4    | 0.33 |
| 12                             | 269    | 119     | 0.46                                | 27.4           | 702.4                       | 4.8     | 8.45                                      | 0.7    | 0.0848                                     | 1.7    | 1.380                   | 1.9    | 0.1183                  | 0.7    | 0.37 |
| 13                             | 447    | 200     | 0.46                                | 11.3           | 186.6                       | 1.3     | 34.01                                     | 0.7    | 0.0509                                     | 2.4    | 0.190                   | 3.9    | 0.0293                  | 0.7    | 0.19 |
| 14                             | 317    | 105     | 0.34                                | 7.9            | 184.4                       | 1.6     | 34.35                                     | 0.8    | 0.0525                                     | 2.8    | 0.200                   | 3.3    | 0.0291                  | 0.9    | 0.26 |
| 15                             | 145    | 83      | 0.59                                | 36.7           | 1662.7                      | 12.9    | 3.40                                      | 0.7    | 0.1024                                     | 2.2    | 4.160                   | 2.3    | 0.2944                  | 0.7    | 0.32 |
| 16                             | 276    | 125     | 0.47                                | 6.9            | 186.0                       | 1.7     | 34.18                                     | 0.9    | 0.0495                                     | 3.1    | 0.200                   | 3.2    | 0.0293                  | 0.9    | 0.28 |
| 17                             | 283    | 76      | 0.28                                | 7.3            | 190.6                       | 1.6     | 33.23                                     | 0.8    | 0.0520                                     | 2.8    | 0.210                   | 3.7    | 0.0300                  | 0.9    | 0.23 |
| 18                             | 286    | 93      | 0.34                                | 7.3            | 189.6                       | 1.6     | 33.45                                     | 0.8    | 0.0510                                     | 2.8    | 0.220                   | 3.2    | 0.0299                  | 0.8    | 0.26 |
| 19                             | 286    | 69      | 0.25                                | 7.4            | 191.9                       | 1.6     | 33.10                                     | 0.8    | 0.0499                                     | 2.8    | 0.220                   | 4.0    | 0.0303                  | 0.8    | 0.21 |
| 20                             | 293    | 89      | 0.31                                | 7.5            | 188.0                       | 1.5     | 33.77                                     | 0.8    | 0.0505                                     | 2.7    | 0.200                   | 3.7    | 0.0295                  | 0.8    | 0.22 |
| 21                             | 174    | 52      | 0.31                                | 4.5            | 190.7                       | 2.0     | 33.46                                     | 1.0    | 0.0461                                     | 4.1    | 0.210                   | 6.6    | 0.0301                  | 1.1    | 0.17 |
| TUK 83: 11S 749750E / 3731896N |        |         |                                     |                |                             |         |                                           |        |                                            |        |                         |        |                         |        |      |
| 1                              | 426    | 353     | 0.86                                | 9.7            | 168.6                       | 2.0     | 37.70                                     | 1.5    | 0.0509                                     | 3.1    | 0.183                   | 3.8    | 0.0265                  | 1.5    | 0.4  |
| 2                              | 497    | 270     | 0.56                                | 11.3           | 169.0                       | 2.0     | 37.70                                     | 1.2    | 0.0478                                     | 3.2    | 0.172                   | 3.9    | 0.0265                  | 1.2    | 0.3  |
| 3                              | 598    | 373     | 0.64                                | 13.7           | 169.4                       | 1.0     | 37.50                                     | 0.7    | 0.0505                                     | 2.7    | 0.186                   | 2.7    | 0.0267                  | 0.7    | 0.2  |
| 4                              | 720    | 439     | 0.63                                | 16.6           | 170.5                       | 2.0     | 37.30                                     | 1.0    | 0.0489                                     | 2.4    | 0.180                   | 2.6    | 0.0268                  | 1.0    | 0.4  |
| 5                              | 706    | 503     | 0.74                                | 16.2           | 170.1                       | 2.0     | 37.30                                     | 1.0    | 0.0510                                     | 2.4    | 0.194                   | 3.0    | 0.0268                  | 1.0    | 0.3  |
| 6                              | 902    | 422     | 0.48                                | 20.7           | 170.3                       | 3.0     | 37.20                                     | 1.5    | 0.0519                                     | 2.0    | 0.184                   | 3.1    | 0.0268                  | 1.5    | 0.5  |
| 7                              | 764    | 578     | 0.78                                | 17.9           | 173.2                       | 2.0     | 36.60                                     | 1.0    | 0.0516                                     | 2.3    | 0.189                   | 3.0    | 0.0273                  | 1.0    | 0.3  |
| 8                              | 475    | 267     | 0.58                                | 11.4           | 178.1                       | 2.0     | 35.70                                     | 1.0    | 0.0501                                     | 3.2    | 0.194                   | 3.3    | 0.0280                  | 1.0    | 0.3  |
| 9                              | 823    | 438     | 0.55                                | 19.2           | 172.4                       | 2.0     | 36.80                                     | 1.3    | 0.0525                                     | 2.3    | 0.199                   | 2.8    | 0.0272                  | 1.3    | 0.5  |
| 10                             | 668    | 542     | 0.84                                | 16.0           | 177.0                       | 2.0     | 36.00                                     | 1.0    | 0.0490                                     | 2.6    | 0.192                   | 3.1    | 0.0278                  | 1.0    | 0.3  |
| TUK 18: 11S 743988E / 3715065N |        |         |                                     |                |                             |         |                                           |        |                                            |        |                         |        |                         |        |      |
| 1                              | 302    | 318     | 1.09                                | 6.9            | 169.0                       | 1.0     | 37.60                                     | 0.8    | 0.0513                                     | 4.0    | 0.183                   | 4.9    | 0.0265                  | 0.8    | 0.2  |
| 2                              | 452    | 262     | 0.60                                | 10.5           | 172.0                       | 2.0     | 37.10                                     | 1.0    | 0.0454                                     | 3.3    | 0.169                   | 3.4    | 0.0270                  | 1.0    | 0.3  |
| 3                              | 755    | 541     | 0.74                                | 17.3           | 170.0                       | 2.0     | 37.50                                     | 1.4    | 0.0479                                     | 2.4    | 0.174                   | 2.9    | 0.0266                  | 1.4    | 0.5  |
| 4                              | 333    | 186     | 0.58                                | 7.4            | 165.0                       | 2.0     | 38.60                                     | 1.1    | 0.0481                                     | 3.7    | 0.172                   | 3.8    | 0.0259                  | 1.1    | 0.3  |
| 5                              | 513    | 313     | 0.63                                | 12.0           | 173.0                       | 1.0     | 36.90                                     | 0.7    | 0.0483                                     | 2.9    | 0.181                   | 3.0    | 0.0271                  | 0.7    | 0.2  |
| 6                              | 419    | 264     | 0.65                                | 9.7            | 171.0                       | 2.0     | 37.10                                     | 1.0    | 0.0521                                     | 3.2    | 0.190                   | 3.7    | 0.0269                  | 1.0    | 0.3  |
| 7                              | 615    | 443     | 0.74                                | 14.1           | 170.0                       | 2.0     | 37.30                                     | 0.9    | 0.0504                                     | 2.7    | 0.186                   | 2.8    | 0.0268                  | 0.9    | 0.3  |
| 8                              | 523    | 424     | 0.84                                | 11.9           | 168.0                       | 3.0     | 37.70                                     | 1.7    | 0.0531                                     | 2.8    | 0.194                   | 3.3    | 0.0265                  | 1.7    | 0.5  |
| 9                              | 605    | 385     | 0.66                                | 13.9           | 170.0                       | 2.0     | 37.30                                     | 1.0    | 0.0500                                     | 2.7    | 0.182                   | 3.1    | 0.0268                  | 1.0    | 0.3  |



|    |     |     |      |      |       |     |       |     |        |     |       |     |        |     |     |
|----|-----|-----|------|------|-------|-----|-------|-----|--------|-----|-------|-----|--------|-----|-----|
| 10 | 546 | 363 | 0.69 | 12.7 | 172.0 | 2.0 | 36.90 | 1.3 | 0.0511 | 2.8 | 0.168 | 5.6 | 0.0269 | 1.3 | 0.2 |
| 11 | 370 | 489 | 1.36 | 8.3  | 167.0 | 2.0 | 38.00 | 1.5 | 0.0518 | 3.4 | 0.192 | 4.1 | 0.0263 | 1.5 | 0.4 |
| 12 | 352 | 189 | 0.56 | 8.4  | 176.0 | 1.0 | 36.20 | 0.7 | 0.0472 | 3.6 | 0.180 | 3.7 | 0.0277 | 0.7 | 0.2 |

TUK 88: 11S 743943E / 3723386N

|    |      |      |      |      |       |     |       |     |        |     |       |      |        |     |      |
|----|------|------|------|------|-------|-----|-------|-----|--------|-----|-------|------|--------|-----|------|
| 1  | 1821 | 2855 | 1.62 | 41.8 | 170.3 | 0.6 | 37.39 | 0.4 | 0.0500 | 1.3 | 0.180 | 1.7  | 0.0300 | 0.4 | 0.22 |
| 2  | 596  | 500  | 0.87 | 14.3 | 177.4 | 1.1 | 35.90 | 0.6 | 0.0500 | 2.1 | 0.180 | 2.4  | 0.0300 | 0.6 | 0.26 |
| 3  | 512  | 334  | 0.67 | 11.4 | 164.7 | 1.2 | 38.68 | 0.7 | 0.0500 | 2.5 | 0.170 | 2.6  | 0.0300 | 0.7 | 0.28 |
| 4  | 521  | 347  | 0.69 | 11.9 | 168.4 | 1.2 | 37.72 | 0.7 | 0.0500 | 2.3 | 0.190 | 2.9  | 0.0300 | 0.7 | 0.24 |
| 5  | 406  | 311  | 0.79 | 9.6  | 174.7 | 1.4 | 36.44 | 0.8 | 0.0500 | 2.7 | 0.180 | 3.2  | 0.0300 | 0.8 | 0.25 |
| 6  | 2177 | 5975 | 2.84 | 53.7 | 182.4 | 0.6 | 34.85 | 0.4 | 0.0500 | 1.2 | 0.190 | 1.3  | 0.0300 | 0.4 | 0.27 |
| 7  | 395  | 265  | 0.69 | 9.1  | 170.3 | 1.4 | 37.34 | 0.8 | 0.0500 | 2.7 | 0.180 | 3.1  | 0.0300 | 0.8 | 0.26 |
| 8  | 580  | 293  | 0.52 | 13.5 | 171.8 | 1.2 | 37.03 | 0.7 | 0.0500 | 2.3 | 0.190 | 3.1  | 0.0300 | 0.7 | 0.22 |
| 9  | 437  | 431  | 1.02 | 10.6 | 179.3 | 1.4 | 35.48 | 0.7 | 0.0500 | 2.5 | 0.190 | 3.3  | 0.0300 | 0.8 | 0.23 |
| 10 | 197  | 138  | 0.72 | 4.3  | 159.7 | 2.0 | 39.80 | 1.2 | 0.0500 | 4.1 | 0.160 | 5.7  | 0.0300 | 1.2 | 0.22 |
| 11 | 314  | 306  | 1.00 | 7.2  | 168.2 | 1.5 | 37.54 | 0.9 | 0.0600 | 2.9 | 0.160 | 9.5  | 0.0300 | 1.0 | 0.11 |
| 12 | 429  | 281  | 0.68 | 10.0 | 172.4 | 1.3 | 36.86 | 0.8 | 0.0500 | 2.6 | 0.190 | 2.9  | 0.0300 | 0.8 | 0.26 |
| 13 | 82   | 69   | 0.87 | 1.9  | 167.8 | 3.0 | 37.66 | 1.8 | 0.0500 | 5.8 | 0.170 | 13.0 | 0.0300 | 1.9 | 0.15 |
| 14 | 493  | 430  | 0.90 | 11.3 | 170.0 | 1.3 | 37.41 | 0.7 | 0.0500 | 2.9 | 0.180 | 3.4  | 0.0300 | 0.7 | 0.22 |
| 15 | 292  | 176  | 0.62 | 6.8  | 172.9 | 1.6 | 36.83 | 0.9 | 0.0500 | 3.4 | 0.170 | 5.7  | 0.0300 | 1.0 | 0.17 |
| 16 | 577  | 411  | 0.74 | 13.6 | 173.8 | 1.2 | 36.48 | 0.7 | 0.0500 | 2.2 | 0.190 | 2.5  | 0.0300 | 0.7 | 0.27 |
| 17 | 395  | 390  | 1.02 | 9.1  | 170.6 | 1.4 | 37.36 | 0.8 | 0.0500 | 2.9 | 0.180 | 3.8  | 0.0300 | 0.8 | 0.22 |
| 18 | 319  | 263  | 0.85 | 7.3  | 169.1 | 1.5 | 37.46 | 0.9 | 0.0500 | 3.0 | 0.180 | 4.5  | 0.0300 | 0.9 | 0.21 |
| 19 | 506  | 332  | 0.68 | 11.6 | 168.7 | 1.2 | 37.62 | 0.7 | 0.0500 | 2.4 | 0.190 | 2.5  | 0.0300 | 0.7 | 0.28 |
| 20 | 566  | 488  | 0.89 | 13.2 | 171.8 | 1.2 | 36.95 | 0.7 | 0.0500 | 2.3 | 0.190 | 2.7  | 0.0300 | 0.7 | 0.26 |

TUK 40: 11S 687330E / 3660014N

|    |     |     |      |      |       |     |       |     |        |     |       |      |        |     |      |
|----|-----|-----|------|------|-------|-----|-------|-----|--------|-----|-------|------|--------|-----|------|
| 1  | 113 | 68  | 0.62 | 2.6  | 167.8 | 2.3 | 37.73 | 1.4 | 0.0504 | 4.5 | 0.170 | 10.1 | 0.0300 | 1.4 | 0.14 |
| 2  | 259 | 117 | 0.47 | 5.4  | 154.9 | 1.9 | 41.04 | 1.2 | 0.0506 | 4.2 | 0.130 | 13.6 | 0.0200 | 1.3 | 0.10 |
| 3  | 321 | 320 | 1.03 | 7.2  | 166.7 | 1.4 | 38.10 | 0.9 | 0.0524 | 2.8 | 0.180 | 3.0  | 0.0300 | 0.9 | 0.29 |
| 4  | 234 | 157 | 0.69 | 5.4  | 170.1 | 1.8 | 37.32 | 1.0 | 0.0497 | 3.4 | 0.180 | 4.2  | 0.0300 | 1.0 | 0.24 |
| 5  | 261 | 222 | 0.88 | 5.9  | 168.5 | 1.9 | 37.80 | 1.1 | 0.0499 | 3.2 | 0.170 | 4.8  | 0.0300 | 1.1 | 0.24 |
| 6  | 394 | 279 | 0.73 | 9.0  | 168.6 | 1.3 | 37.67 | 0.8 | 0.0510 | 2.6 | 0.190 | 2.7  | 0.0300 | 0.8 | 0.29 |
| 7  | 280 | 187 | 0.69 | 6.0  | 158.3 | 1.6 | 40.20 | 1.0 | 0.0538 | 3.3 | 0.140 | 7.7  | 0.0200 | 1.0 | 0.13 |
| 8  | 511 | 314 | 0.63 | 10.9 | 157.6 | 1.1 | 40.25 | 0.7 | 0.0487 | 2.4 | 0.170 | 4.4  | 0.0200 | 0.7 | 0.17 |
| 9  | 371 | 245 | 0.68 | 8.1  | 162.0 | 1.4 | 39.27 | 0.9 | 0.0508 | 3.0 | 0.170 | 3.9  | 0.0300 | 0.9 | 0.22 |
| 10 | 187 | 149 | 0.82 | 4.3  | 169.7 | 1.9 | 37.48 | 1.1 | 0.0496 | 3.9 | 0.180 | 4.0  | 0.0300 | 1.1 | 0.28 |
| 11 | 200 | 72  | 0.37 | 3.9  | 142.8 | 1.6 | 44.56 | 1.1 | 0.0513 | 4.1 | 0.120 | 12.2 | 0.0200 | 1.2 | 0.10 |
| 12 | 294 | 319 | 1.12 | 6.8  | 172.2 | 1.5 | 36.97 | 0.9 | 0.0489 | 2.9 | 0.180 | 3.1  | 0.0300 | 0.9 | 0.29 |

KE31: 11S 775197 ? 3656047

|    |      |      |      |       |        |     |       |     |        |     |       |      |        |     |      |
|----|------|------|------|-------|--------|-----|-------|-----|--------|-----|-------|------|--------|-----|------|
| 1  | 90   | 37   | 0.43 | 1.9   | 157.4  | 2.5 | 40.29 | 1.6 | 0.0524 | 5.3 | 0.082 | 48.4 | 0.0240 | 2.1 | .043 |
| 2  | 135  | 60   | 0.46 | 3.3   | 181.8  | 2.2 | 34.99 | 1.2 | 0.0492 | 4.1 | 0.203 | 4.6  | 0.0287 | 1.2 | .257 |
| 3  | 1297 | 642  | 0.51 | 33.1  | 188.4  | 0.7 | 33.72 | 0.4 | 0.0500 | 1.3 | 0.204 | 1.4  | 0.0296 | 0.4 | .276 |
| 4  | 666  | 413  | 0.64 | 17.2  | 191.3  | 1.0 | 33.19 | 0.5 | 0.0502 | 1.8 | 0.200 | 2.6  | 0.0301 | 0.5 | .206 |
| 5  | 155  | 43   | 0.28 | 3.9   | 188.0  | 2.1 | 33.75 | 1.1 | 0.0510 | 3.8 | 0.201 | 4.5  | 0.0296 | 1.1 | .250 |
| 6  | 435  | 180  | 0.43 | 10.7  | 182.5  | 1.2 | 34.84 | 0.7 | 0.0493 | 2.3 | 0.185 | 3.3  | 0.0286 | 0.7 | .208 |
| 7  | 3290 | 1877 | 0.59 | 77.2  | 173.2  | 0.5 | 36.62 | 0.3 | 0.0516 | 0.8 | 0.186 | 1.4  | 0.0272 | 0.3 | .211 |
| 8  | 920  | 290  | 0.33 | 23.3  | 187.2  | 0.9 | 33.92 | 0.5 | 0.0500 | 1.6 | 0.205 | 1.7  | 0.0295 | 0.5 | .279 |
| 9  | 1752 | 787  | 0.46 | 45.2  | 190.9  | 0.7 | 33.28 | 0.3 | 0.0497 | 1.2 | 0.205 | 1.3  | 0.0300 | 0.3 | .268 |
| 10 | 1880 | 737  | 0.40 | 48.4  | 190.3  | 0.6 | 33.40 | 0.3 | 0.0496 | 1.1 | 0.202 | 1.4  | 0.0299 | 0.3 | .239 |
| 11 | 268  | 159  | 0.61 | 6.8   | 186.6  | 1.7 | 34.04 | 0.9 | 0.0500 | 3.0 | 0.224 | 5.4  | 0.0296 | 0.9 | .174 |
| 12 | 717  | 48   | 0.07 | 121.2 | 1145.0 | 4.3 | 5.08  | 0.4 | 0.0877 | 0.6 | 2.381 | 0.7  | 0.1968 | 0.4 | .574 |

Araz Wash diorite unit

PT 291: 11S 709224E / 3632967N

|    |     |     |      |      |       |     |       |     |        |     |       |       |        |      |      |
|----|-----|-----|------|------|-------|-----|-------|-----|--------|-----|-------|-------|--------|------|------|
| 1  | 357 | 216 | 0.62 | 8.1  | 169.0 | 1.5 | 37.63 | 0.9 | 0.0499 | 2.3 | 0.188 | 2.78  | 0.0266 | 0.91 | 0.33 |
| 2  | 318 | 351 | 1.14 | 7.3  | 170.4 | 1.6 | 37.36 | 0.9 | 0.0489 | 2.3 | 0.191 | 3.66  | 0.0269 | 0.93 | 0.25 |
| 3  | 592 | 434 | 0.76 | 14.1 | 175.3 | 1.4 | 36.21 | 0.8 | 0.0511 | 1.7 | 0.190 | 2.25  | 0.0276 | 0.81 | 0.36 |
| 4  | 257 | 207 | 0.83 | 6.5  | 186.8 | 3.2 | 34.01 | 1.7 | 0.0499 | 5.4 | 0.159 | 14.67 | 0.0290 | 1.82 | 0.12 |
| 5  | 289 | 172 | 0.61 | 7.4  | 188.5 | 2.8 | 33.58 | 1.5 | 0.0525 | 4.3 | 0.150 | 18.40 | 0.0292 | 1.64 | 0.09 |
| 6  | 184 | 141 | 0.79 | 4.9  | 196.6 | 3.4 | 32.26 | 1.7 | 0.0508 | 5.3 | 0.189 | 11.31 | 0.0308 | 1.78 | 0.16 |
| 7  | 296 | 181 | 0.63 | 8.5  | 178.9 | 3.7 | 29.83 | 1.3 | 0.1804 | 6.2 | 0.355 | 23.79 | 0.0295 | 2.44 | 0.10 |
| 8  | 626 | 568 | 0.94 | 14.6 | 172.6 | 1.9 | 36.84 | 1.1 | 0.0498 | 2.7 | 0.180 | 3.66  | 0.0271 | 1.10 | 0.30 |
| 9  | 299 | 263 | 0.91 | 7.1  | 175.2 | 2.4 | 36.21 | 1.4 | 0.0518 | 3.6 | 0.187 | 4.82  | 0.0275 | 1.39 | 0.29 |
| 10 | 414 | 279 | 0.70 | 9.8  | 175.9 | 4.5 | 36.21 | 2.5 | 0.0483 | 3.6 | 0.174 | 5.21  | 0.0275 | 2.55 | 0.49 |
| 11 | 382 | 234 | 0.63 | 9.5  | 183.5 | 2.2 | 34.64 | 1.2 | 0.0497 | 2.9 | 0.193 | 3.55  | 0.0288 | 1.18 | 0.33 |
| 12 | 291 | 285 | 1.01 | 7.0  | 178.9 | 2.1 | 35.55 | 1.2 | 0.0494 | 3.3 | 0.179 | 5.56  | 0.0280 | 1.17 | 0.21 |

## TUK 57: 11S 712222E / 3634434N

|    |      |      |      |       |        |     |       |     |        |     |       |      |        |      |      |
|----|------|------|------|-------|--------|-----|-------|-----|--------|-----|-------|------|--------|------|------|
| 1  | 249  | 139  | 0.58 | 5.9   | 174.1  | 1.7 | 36.44 | 1.0 | 0.0515 | 3.1 | 0.190 | 3.70 | 0.0274 | 0.95 | 0.26 |
| 2  | 764  | 701  | 0.95 | 17.0  | 164.3  | 0.9 | 38.71 | 0.6 | 0.0503 | 1.9 | 0.175 | 2.28 | 0.0258 | 0.57 | 0.25 |
| 3  | 315  | 62   | 0.20 | 6.9   | 161.1  | 1.5 | 39.49 | 0.9 | 0.0497 | 5.3 | 0.165 | 5.98 | 0.0253 | 0.90 | 0.15 |
| 4  | 643  | 85   | 0.14 | 14.9  | 171.6  | 1.1 | 37.02 | 0.7 | 0.0506 | 2.1 | 0.186 | 2.41 | 0.0270 | 0.65 | 0.27 |
| 5  | 1987 | 1114 | 0.58 | 49.1  | 182.7  | 0.6 | 34.77 | 0.4 | 0.0500 | 1.2 | 0.198 | 1.22 | 0.0288 | 0.35 | 0.29 |
| 6  | 697  | 610  | 0.90 | 16.7  | 178.2  | 1.0 | 35.76 | 0.6 | 0.0478 | 2.0 | 0.184 | 2.04 | 0.0280 | 0.58 | 0.28 |
| 7  | 841  | 251  | 0.31 | 19.4  | 170.5  | 0.9 | 37.32 | 0.5 | 0.0491 | 1.8 | 0.180 | 1.92 | 0.0268 | 0.53 | 0.27 |
| 8  | 2104 | 1237 | 0.61 | 51.4  | 180.4  | 0.7 | 35.20 | 0.4 | 0.0503 | 1.2 | 0.196 | 1.30 | 0.0284 | 0.37 | 0.28 |
| 9  | 286  | 185  | 0.67 | 7.0   | 180.9  | 1.5 | 35.06 | 0.9 | 0.0513 | 2.8 | 0.202 | 2.90 | 0.0285 | 0.85 | 0.29 |
| 10 | 264  | 136  | 0.53 | 6.5   | 181.8  | 1.7 | 34.88 | 0.9 | 0.0517 | 3.0 | 0.180 | 9.47 | 0.0285 | 1.02 | 0.11 |
| 11 | 234  | 132  | 0.58 | 5.5   | 173.3  | 1.7 | 36.68 | 1.0 | 0.0502 | 3.3 | 0.177 | 5.60 | 0.0272 | 1.02 | 0.18 |
| 12 | 1475 | 92   | 0.06 | 35.3  | 176.9  | 0.7 | 35.92 | 0.4 | 0.0500 | 1.3 | 0.191 | 1.42 | 0.0278 | 0.39 | 0.28 |
| 13 | 1115 | 158  | 0.15 | 28.1  | 186.7  | 0.8 | 34.05 | 0.4 | 0.0494 | 1.5 | 0.191 | 2.30 | 0.0293 | 0.45 | 0.19 |
| 14 | 1223 | 160  | 0.13 | 344.4 | 1789.5 | 4.8 | 3.05  | 0.3 | 0.1293 | 0.3 | 5.841 | 0.41 | 0.3279 | 0.26 | 0.65 |
| 15 | 249  | 135  | 0.56 | 5.8   | 171.6  | 1.9 | 37.09 | 1.1 | 0.0489 | 3.9 | 0.177 | 4.66 | 0.0269 | 1.09 | 0.23 |

## TUK 58: 11S 712290 / 3634247N

|    |      |     |      |       |        |      |       |     |        |     |       |      |        |     |     |
|----|------|-----|------|-------|--------|------|-------|-----|--------|-----|-------|------|--------|-----|-----|
| 1  | 1306 | 574 | 0.45 | 30.7  | 174.3  | 0.8  | 36.50 | 0.4 | .04954 | 1.3 | 0.186 | 1.4  | 0.0274 | 0.4 | 0.3 |
| 2  | 178  | 88  | 0.51 | 42.2  | 1565.7 | 9.1  | 3.62  | 0.6 | .10209 | 0.8 | 3.871 | 1.0  | 0.2764 | 0.6 | 0.6 |
| 3  | 197  | 50  | 0.26 | 54.5  | 1801.2 | 11.6 | 3.10  | 0.7 | .11142 | 0.8 | 4.947 | 1.0  | 0.3227 | 0.7 | 0.6 |
| 4  | 123  | 155 | 1.30 | 25.1  | 1371.7 | 10.0 | 4.21  | 0.7 | .08809 | 1.1 | 2.882 | 1.3  | 0.2373 | 0.7 | 0.6 |
| 5  | 765  | 228 | 0.31 | 18.4  | 178.1  | 0.9  | 35.77 | 0.5 | .04819 | 1.8 | 0.183 | 2.1  | 0.0279 | 0.5 | 0.2 |
| 6  | 361  | 145 | 0.41 | 8.6   | 175.7  | 1.2  | 36.14 | 0.7 | .05059 | 2.4 | 0.189 | 2.7  | 0.0276 | 0.7 | 0.3 |
| 7  | 308  | 87  | 0.29 | 7.2   | 172.4  | 1.4  | 36.83 | 0.8 | .05087 | 2.7 | 0.180 | 3.9  | 0.0271 | 0.8 | 0.2 |
| 8  | 726  | 238 | 0.34 | 176.2 | 1601.0 | 5.3  | 3.54  | 0.3 | .10033 | 0.4 | 3.898 | 0.5  | 0.2824 | 0.3 | 0.7 |
| 9  | 278  | 83  | 0.31 | 7.7   | 203.5  | 1.4  | 30.91 | 0.7 | .05707 | 2.3 | 0.158 | 17.2 | 0.0315 | 1.0 | 0.1 |
| 10 | 404  | 156 | 0.40 | 9.7   | 177.0  | 1.0  | 35.84 | 0.6 | .05148 | 2.0 | 0.196 | 2.2  | 0.0279 | 0.6 | 0.3 |

## TUK 87: 11S 743682E / 3731258N

|    |      |       |      |      |       |     |       |     |        |     |       |       |        |      |      |
|----|------|-------|------|------|-------|-----|-------|-----|--------|-----|-------|-------|--------|------|------|
| 1  | 1933 | 3432  | 1.83 | 42.7 | 163.8 | 0.6 | 38.87 | 0.4 | 0.0491 | 1.2 | 0.171 | 1.43  | 0.0257 | 0.35 | 0.25 |
| 2  | 2108 | 11918 | 5.84 | 63.2 | 220.2 | 0.8 | 28.66 | 0.3 | 0.0541 | 0.9 | 0.250 | 1.84  | 0.0348 | 0.36 | 0.20 |
| 3  | 1459 | 2144  | 1.52 | 34.3 | 174.1 | 0.7 | 36.58 | 0.4 | 0.0486 | 1.3 | 0.180 | 1.58  | 0.0273 | 0.39 | 0.25 |
| 4  | 1968 | 3577  | 1.88 | 47.4 | 178.2 | 0.6 | 35.68 | 0.4 | 0.0495 | 1.2 | 0.189 | 1.45  | 0.0280 | 0.35 | 0.24 |
| 5  | 1931 | 3542  | 1.89 | 44.4 | 170.1 | 0.6 | 37.38 | 0.4 | 0.0497 | 1.2 | 0.179 | 1.57  | 0.0267 | 0.36 | 0.23 |
| 6  | 513  | 357   | 0.72 | 12.3 | 177.0 | 1.2 | 35.99 | 0.7 | 0.0480 | 2.4 | 0.174 | 3.51  | 0.0277 | 0.70 | 0.20 |
| 7  | 1162 | 280   | 0.25 | 25.2 | 160.5 | 0.7 | 39.57 | 0.5 | 0.0511 | 1.5 | 0.177 | 1.67  | 0.0253 | 0.45 | 0.27 |
| 8  | 1845 | 917   | 0.51 | 41.9 | 167.7 | 0.7 | 37.84 | 0.4 | 0.0517 | 1.3 | 0.178 | 2.03  | 0.0263 | 0.39 | 0.19 |
| 9  | 1646 | 128   | 0.08 | 38.0 | 171.0 | 0.7 | 37.22 | 0.4 | 0.0491 | 1.4 | 0.181 | 1.43  | 0.0269 | 0.39 | 0.27 |
| 10 | 2696 | 840   | 0.32 | 57.2 | 157.1 | 0.5 | 40.53 | 0.3 | 0.0493 | 1.0 | 0.167 | 1.14  | 0.0247 | 0.29 | 0.26 |
| 11 | 487  | 472   | 1.00 | 11.0 | 167.1 | 1.2 | 38.08 | 0.7 | 0.0493 | 3.1 | 0.178 | 3.20  | 0.0263 | 0.73 | 0.23 |
| 12 | 1978 | 4812  | 2.51 | 47.3 | 176.7 | 0.7 | 35.97 | 0.4 | 0.0498 | 1.3 | 0.188 | 1.47  | 0.0278 | 0.38 | 0.26 |
| 13 | 1662 | 4763  | 2.96 | 38.5 | 171.6 | 0.7 | 37.06 | 0.4 | 0.0497 | 1.4 | 0.181 | 1.73  | 0.0269 | 0.40 | 0.23 |
| 14 | 2368 | 4556  | 1.99 | 54.1 | 169.2 | 0.7 | 37.59 | 0.4 | 0.0496 | 1.2 | 0.180 | 1.30  | 0.0266 | 0.39 | 0.30 |
| 15 | 1821 | 3409  | 1.93 | 41.9 | 169.4 | 1.0 | 37.34 | 0.4 | 0.0543 | 6.6 | 0.186 | 9.58  | 0.0267 | 0.57 | 0.06 |
| 16 | 2094 | 3418  | 1.69 | 49.3 | 173.5 | 0.7 | 36.46 | 0.4 | 0.0539 | 3.4 | 0.097 | 66.39 | 0.0265 | 2.11 | 0.03 |
| 17 | 1923 | 225   | 0.12 | 44.7 | 172.2 | 0.7 | 36.95 | 0.4 | 0.0491 | 1.3 | 0.179 | 1.55  | 0.0270 | 0.43 | 0.28 |
| 18 | 1711 | 618   | 0.37 | 42.3 | 182.7 | 0.7 | 34.77 | 0.4 | 0.0502 | 1.4 | 0.197 | 1.48  | 0.0287 | 0.40 | 0.27 |
| 19 | 963  | 1061  | 1.14 | 22.1 | 170.0 | 0.9 | 37.44 | 0.5 | 0.0491 | 1.8 | 0.178 | 2.05  | 0.0267 | 0.52 | 0.25 |
| 20 | 2061 | 325   | 0.16 | 46.6 | 167.3 | 0.6 | 38.00 | 0.4 | 0.0500 | 1.3 | 0.180 | 1.44  | 0.0263 | 0.37 | 0.26 |

## Middle Camp porphyritic granodiorite unit

## TUK 42: 11S 688565E / 3660194N

|    |     |     |      |      |       |     |       |     |        |     |       |      |        |      |      |
|----|-----|-----|------|------|-------|-----|-------|-----|--------|-----|-------|------|--------|------|------|
| 1  | 358 | 191 | 0.55 | 8.2  | 168.9 | 1.4 | 37.63 | 0.8 | 0.0502 | 2.7 | 0.176 | 3.73 | 0.0265 | 0.81 | 0.22 |
| 2  | 145 | 105 | 0.75 | 3.1  | 159.2 | 2.1 | 40.04 | 1.3 | 0.0485 | 4.4 | 0.151 | 8.43 | 0.0249 | 1.33 | 0.16 |
| 3  | 488 | 338 | 0.72 | 11.0 | 166.1 | 1.2 | 38.28 | 0.7 | 0.0500 | 2.3 | 0.173 | 3.25 | 0.0261 | 0.70 | 0.22 |
| 4  | 221 | 164 | 0.77 | 5.1  | 169.5 | 1.8 | 37.46 | 1.0 | 0.0511 | 3.4 | 0.182 | 4.25 | 0.0266 | 1.04 | 0.24 |
| 5  | 309 | 218 | 0.73 | 7.1  | 169.4 | 1.5 | 37.54 | 0.9 | 0.0497 | 2.9 | 0.183 | 3.06 | 0.0266 | 0.87 | 0.29 |
| 6  | 347 | 362 | 1.08 | 7.7  | 163.6 | 1.4 | 38.83 | 0.8 | 0.0509 | 2.8 | 0.181 | 2.93 | 0.0258 | 0.84 | 0.29 |
| 7  | 520 | 302 | 0.60 | 11.7 | 166.3 | 1.1 | 38.30 | 0.7 | 0.0487 | 2.3 | 0.169 | 3.03 | 0.0261 | 0.68 | 0.23 |
| 8  | 872 | 403 | 0.48 | 19.9 | 168.4 | 0.9 | 37.69 | 0.5 | 0.0515 | 1.7 | 0.184 | 2.13 | 0.0265 | 0.52 | 0.25 |
| 9  | 595 | 487 | 0.85 | 13.3 | 164.9 | 1.2 | 38.56 | 0.7 | 0.0502 | 2.1 | 0.174 | 2.76 | 0.0259 | 0.73 | 0.27 |
| 10 | 246 | 121 | 0.51 | 5.3  | 160.1 | 1.9 | 39.66 | 1.2 | 0.0516 | 3.4 | 0.180 | 3.62 | 0.0252 | 1.19 | 0.33 |

## TUK 86: 11S 743682E / 3731288N

|   |     |     |      |      |       |     |       |     |        |     |       |      |        |      |      |
|---|-----|-----|------|------|-------|-----|-------|-----|--------|-----|-------|------|--------|------|------|
| 1 | 195 | 149 | 0.79 | 4.1  | 156.1 | 1.8 | 40.74 | 1.1 | 0.0505 | 3.8 | 0.171 | 3.97 | 0.0245 | 1.12 | 0.28 |
| 2 | 123 | 162 | 1.37 | 2.6  | 157.6 | 2.3 | 40.30 | 1.5 | 0.0515 | 5.0 | 0.166 | 6.70 | 0.0247 | 1.47 | 0.22 |
| 3 | 708 | 469 | 0.68 | 15.2 | 159.0 | 0.9 | 40.09 | 0.6 | 0.0484 | 2.7 | 0.166 | 2.76 | 0.0249 | 0.58 | 0.21 |
| 4 | 400 | 397 | 1.02 | 8.7  | 161.7 | 1.3 | 39.44 | 0.8 | 0.0477 | 2.7 | 0.159 | 3.68 | 0.0253 | 0.78 | 0.21 |

|    |      |      |      |      |       |     |       |     |        |     |       |       |        |      |      |
|----|------|------|------|------|-------|-----|-------|-----|--------|-----|-------|-------|--------|------|------|
| 5  | 131  | 132  | 1.04 | 2.9  | 164.5 | 2.3 | 38.65 | 1.4 | 0.0500 | 4.9 | 0.124 | 18.60 | 0.0254 | 1.59 | 0.09 |
| 6  | 298  | 365  | 1.27 | 6.6  | 163.7 | 1.6 | 38.92 | 1.0 | 0.0482 | 3.3 | 0.163 | 4.22  | 0.0256 | 0.96 | 0.23 |
| 7  | 83   | 95   | 1.17 | 1.8  | 157.8 | 3.0 | 40.47 | 1.9 | 0.0467 | 6.8 | 0.112 | 20.36 | 0.0243 | 2.02 | 0.10 |
| 8  | 137  | 112  | 0.85 | 3.2  | 173.0 | 2.4 | 36.91 | 1.4 | 0.0465 | 4.9 | 0.212 | 10.18 | 0.0274 | 1.51 | 0.15 |
| 9  | 163  | 162  | 1.03 | 3.5  | 160.5 | 2.1 | 39.47 | 1.3 | 0.0532 | 4.2 | 0.178 | 5.24  | 0.0253 | 1.28 | 0.24 |
| 10 | 153  | 180  | 1.21 | 3.4  | 162.0 | 2.2 | 39.13 | 1.3 | 0.0530 | 6.3 | 0.187 | 6.48  | 0.0256 | 1.33 | 0.21 |
| 11 | 2675 | 1903 | 0.73 | 63.1 | 174.0 | 1.7 | 36.43 | 1.0 | 0.0522 | 2.5 | 0.193 | 2.84  | 0.0274 | 1.00 | 0.35 |
| 12 | 566  | 397  | 0.72 | 12.9 | 169.1 | 1.1 | 37.63 | 0.7 | 0.0493 | 2.3 | 0.181 | 2.35  | 0.0266 | 0.66 | 0.28 |
| 13 | 489  | 772  | 1.63 | 10.7 | 162.4 | 1.4 | 39.30 | 0.8 | 0.0473 | 2.5 | 0.162 | 2.95  | 0.0254 | 0.84 | 0.29 |
| 14 | 273  | 520  | 1.97 | 6.2  | 169.2 | 1.6 | 37.75 | 1.0 | 0.0463 | 3.4 | 0.169 | 3.53  | 0.0265 | 0.96 | 0.27 |
| 15 | 663  | 592  | 0.92 | 14.8 | 165.6 | 1.0 | 38.42 | 0.6 | 0.0497 | 2.1 | 0.167 | 3.26  | 0.0259 | 0.63 | 0.20 |
| 16 | 210  | 277  | 1.36 | 4.8  | 167.9 | 1.8 | 37.85 | 1.1 | 0.0504 | 3.7 | 0.196 | 5.42  | 0.0265 | 1.11 | 0.21 |
| 17 | 850  | 1209 | 1.47 | 19.4 | 169.3 | 0.9 | 37.60 | 0.6 | 0.0491 | 1.9 | 0.177 | 2.11  | 0.0266 | 0.56 | 0.26 |
| 18 | 407  | 391  | 0.99 | 9.0  | 163.1 | 1.3 | 38.90 | 0.8 | 0.0517 | 2.7 | 0.177 | 3.35  | 0.0257 | 0.81 | 0.24 |
| 19 | 113  | 81   | 0.74 | 2.6  | 170.3 | 2.7 | 37.40 | 1.5 | 0.0484 | 7.7 | 0.153 | 12.08 | 0.0265 | 1.56 | 0.13 |
| 20 | 443  | 449  | 1.05 | 9.8  | 164.1 | 1.3 | 38.74 | 0.8 | 0.0502 | 2.6 | 0.174 | 3.48  | 0.0258 | 0.78 | 0.22 |

TM650: 11S 746643E / 3702159N

|    |      |      |      |      |       |     |       |     |       |     |       |     |        |     |      |
|----|------|------|------|------|-------|-----|-------|-----|-------|-----|-------|-----|--------|-----|------|
| 1  | 346  | 202  | 0.60 | 7.2  | 153.8 | 1.4 | 41.49 | 0.9 | .0475 | 3.1 | 0.149 | 4.5 | 0.0240 | 0.9 | .196 |
| 2  | 495  | 389  | 0.81 | 10.5 | 156.9 | 1.2 | 40.63 | 0.7 | .0481 | 2.6 | 0.176 | 3.4 | 0.0252 | 0.8 | .242 |
| 3  | 147  | 84   | 0.59 | 3.4  | 168.1 | 2.3 | 37.78 | 1.4 | .0532 | 4.6 | 0.181 | 3.5 | 0.0266 | 1.0 | .279 |
| 4  | 518  | 342  | 0.68 | 11.1 | 158.3 | 1.2 | 40.14 | 0.7 | .0508 | 2.5 | 0.159 | 3.3 | 0.0248 | 0.8 | .229 |
| 5  | 608  | 481  | 0.82 | 13.7 | 166.3 | 1.1 | 38.19 | 0.7 | .0482 | 2.3 | 0.170 | 2.8 | 0.0252 | 0.8 | .278 |
| 6  | 300  | 140  | 0.48 | 6.4  | 158.3 | 1.7 | 40.02 | 1.0 | .0521 | 3.5 | 0.164 | 4.0 | 0.0258 | 0.8 | .201 |
| 7  | 171  | 80   | 0.48 | 3.9  | 170.0 | 2.2 | 37.30 | 1.3 | .0489 | 4.3 | 0.175 | 3.8 | 0.0263 | 0.8 | .198 |
| 8  | 1547 | 2241 | 1.50 | 36.5 | 174.7 | 0.8 | 36.39 | 0.5 | .0490 | 1.4 | 0.183 | 2.5 | 0.0266 | 0.7 | .280 |
| 9  | 568  | 395  | 0.72 | 12.7 | 165.7 | 1.2 | 38.39 | 0.7 | .0497 | 4.1 | 0.198 | 4.7 | 0.0262 | 0.9 | .182 |
| 10 | 454  | 378  | 0.86 | 9.8  | 160.1 | 1.3 | 39.78 | 0.8 | .0501 | 2.9 | 0.181 | 2.4 | 0.0268 | 0.7 | .278 |
| 11 | 275  | 385  | 1.45 | 6.3  | 169.6 | 1.7 | 37.53 | 1.0 | .0486 | 3.4 | 0.174 | 3.0 | 0.0250 | 0.7 | .240 |
| 12 | 546  | 367  | 0.69 | 11.7 | 158.4 | 1.2 | 40.25 | 0.8 | .0496 | 2.7 | 0.155 | 3.7 | 0.0245 | 0.7 | .200 |
| 13 | 475  | 307  | 0.67 | 10.3 | 160.3 | 1.3 | 39.72 | 0.8 | .0587 | 2.7 | 0.170 | 3.4 | 0.0257 | 0.7 | .210 |
| 14 | 480  | 310  | 0.67 | 10.7 | 165.1 | 1.3 | 38.58 | 0.8 | .0509 | 2.7 | 0.177 | 2.8 | 0.0266 | 0.7 | .247 |
| 15 | 469  | 281  | 0.62 | 10.6 | 167.8 | 1.3 | 37.94 | 0.8 | .0491 | 3.6 | 0.175 | 3.7 | 0.0256 | 1.0 | .276 |
| 16 | 508  | 342  | 0.70 | 11.6 | 168.9 | 1.2 | 37.65 | 0.7 | .0508 | 2.4 | 0.177 | 5.9 | 0.0264 | 1.4 | .231 |
| 17 | 412  | 273  | 0.68 | 9.3  | 166.0 | 1.4 | 37.91 | 0.8 | .0499 | 2.6 | 0.175 | 2.6 | 0.0249 | 0.7 | .280 |
| 18 | 614  | 451  | 0.76 | 14.1 | 170.5 | 1.1 | 37.34 | 0.7 | .0494 | 2.3 | 0.179 | 2.7 | 0.0262 | 0.7 | .252 |
| 19 | 507  | 367  | 0.75 | 10.9 | 159.3 | 1.2 | 39.84 | 0.7 | .0492 | 2.4 | 0.169 | 6.2 | 0.0249 | 1.1 | .172 |
| 20 | 525  | 384  | 0.76 | 11.6 | 163.9 | 1.2 | 38.80 | 0.7 | .0522 | 2.4 | 0.185 | 5.4 | 0.0267 | 1.3 | .240 |
| 21 | 533  | 405  | 0.79 | 12.2 | 169.4 | 1.2 | 37.55 | 0.7 | .0488 | 2.3 | 0.189 | 1.4 | 0.0275 | 0.5 | .326 |
| 22 | 265  | 180  | 0.70 | 5.8  | 162.8 | 1.7 | 39.08 | 1.0 | .0499 | 3.6 | 0.173 | 4.5 | 0.0260 | 0.7 | .154 |

TUK 8: 11S 705020E / 3712010N

|    |     |     |      |     |       |     |       |     |        |     |       |      |        |     |       |
|----|-----|-----|------|-----|-------|-----|-------|-----|--------|-----|-------|------|--------|-----|-------|
| 1  | 297 | 187 | 0.65 | 6.6 | 165.2 | 1.3 | 38.52 | 0.8 | 0.0495 | 2.9 | 0.189 | 2.8  | 0.0261 | 0.8 | 0.272 |
| 2  | 260 | 495 | 1.97 | 5.6 | 160.5 | 1.4 | 39.60 | 0.8 | 0.0505 | 3.0 | 0.161 | 3.4  | 0.0251 | 0.8 | 0.242 |
| 3  | 358 | 263 | 0.76 | 7.9 | 164.0 | 1.2 | 38.83 | 0.7 | 0.0487 | 2.6 | 0.169 | 2.8  | 0.0257 | 0.7 | 0.253 |
| 4  | 274 | 223 | 0.84 | 5.9 | 160.4 | 1.3 | 39.70 | 0.8 | 0.0490 | 2.9 | 0.175 | 2.9  | 0.0252 | 0.8 | 0.272 |
| 5  | 337 | 348 | 1.07 | 7.5 | 164.5 | 1.3 | 38.69 | 0.7 | 0.0492 | 2.7 | 0.185 | 2.7  | 0.0259 | 0.7 | 0.277 |
| 6  | 213 | 164 | 0.80 | 4.8 | 166.7 | 1.6 | 38.18 | 0.9 | 0.0492 | 3.5 | 0.200 | 7.0  | 0.0264 | 1   | 0.148 |
| 7  | 70  | 88  | 1.29 | 1.6 | 167.4 | 2.8 | 37.74 | 1.6 | 0.0552 | 5.6 | 0.155 | 10.5 | 0.0261 | 1.7 | 0.16  |
| 8  | 377 | 293 | 0.80 | 8.4 | 165.1 | 1.2 | 38.49 | 0.7 | 0.0505 | 2.5 | 0.180 | 2.6  | 0.0260 | 0.7 | 0.269 |
| 9  | 328 | 575 | 1.81 | 7.2 | 161.7 | 1.2 | 39.17 | 0.7 | 0.0531 | 2.6 | 0.196 | 2.6  | 0.0256 | 0.7 | 0.285 |
| 10 | 385 | 463 | 1.24 | 8.6 | 165.0 | 1.1 | 38.58 | 0.7 | 0.0492 | 2.5 | 0.178 | 2.5  | 0.0259 | 0.7 | 0.268 |
| 11 | 276 | 338 | 1.27 | 6.1 | 164.0 | 1.3 | 38.75 | 0.8 | 0.0503 | 2.9 | 0.187 | 2.9  | 0.0259 | 0.8 | 0.278 |
| 12 | 213 | 261 | 1.27 | 4.8 | 167.6 | 1.6 | 37.90 | 0.9 | 0.0507 | 3.3 | 0.174 | 3.9  | 0.0263 | 0.9 | 0.242 |

KE12: 11S 772811 / 365768S

|         |     |      |      |      |       |     |       |     |        |     |       |      |        |     |      |
|---------|-----|------|------|------|-------|-----|-------|-----|--------|-----|-------|------|--------|-----|------|
| KE12-1  | 884 | 690  | 0.81 | 19.6 | 164.4 | 0.8 | 38.67 | 0.5 | 0.0496 | 1.6 | 0.173 | 2.0  | 0.0258 | 0.5 | .231 |
| KE12-2  | 470 | 190  | 0.42 | 10.6 | 167.3 | 1.1 | 37.95 | 0.6 | 0.0485 | 2.2 | 0.169 | 3.0  | 0.0263 | 0.6 | .215 |
| KE12-3  | 582 | 363  | 0.65 | 13.3 | 169.1 | 1.0 | 37.45 | 0.6 | 0.0485 | 2.0 | 0.165 | 4.0  | 0.0266 | 0.6 | .149 |
| KE12-4  | 534 | 458  | 0.89 | 11.9 | 165.3 | 1.0 | 38.56 | 0.6 | 0.0491 | 2.3 | 0.181 | 2.7  | 0.0260 | 0.6 | .221 |
| KE12-5  | 611 | 552  | 0.93 | 13.9 | 168.3 | 0.9 | 37.77 | 0.6 | 0.0501 | 2.0 | 0.180 | 2.2  | 0.0265 | 0.6 | .255 |
| KE12-6  | 929 | 1421 | 1.58 | 20.3 | 161.8 | 0.8 | 39.38 | 0.5 | 0.0509 | 1.6 | 0.181 | 1.8  | 0.0254 | 0.5 | .259 |
| KE12-7  | 733 | 753  | 1.06 | 17.8 | 180.0 | 1.1 | 35.36 | 0.6 | 0.0492 | 1.8 | 0.196 | 2.1  | 0.0283 | 0.6 | .290 |
| KE12-8  | 145 | 115  | 0.82 | 3.4  | 175.7 | 2.1 | 36.46 | 1.2 | 0.0494 | 4.2 | 0.210 | 6.5  | 0.0276 | 1.2 | .185 |
| KE12-9  | 464 | 521  | 1.16 | 10.7 | 171.6 | 1.2 | 37.21 | 0.7 | 0.0491 | 2.4 | 0.194 | 3.7  | 0.0270 | 0.7 | .188 |
| KE12-10 | 188 | 201  | 1.11 | 4.4  | 170.9 | 1.9 | 36.62 | 1.0 | 0.0523 | 3.7 | 0.144 | 12.2 | 0.0269 | 1.2 | .095 |
| KE12-11 | 159 | 140  | 0.91 | 3.4  | 157.8 | 1.8 | 40.59 | 1.2 | 0.0503 | 4.1 | 0.187 | 5.6  | 0.0248 | 1.2 | .210 |

Gold Rock Ranch granite unit

TUK 34: 11S 703139E / 3642491N

|    |      |     |      |      |       |     |       |     |        |     |       |       |        |      |      |
|----|------|-----|------|------|-------|-----|-------|-----|--------|-----|-------|-------|--------|------|------|
| 1  | 399  | 293 | 0.76 | 8.8  | 162.5 | 1.4 | 39.13 | 0.9 | 0.0501 | 2.1 | 0.170 | 2.88  | 0.0255 | 0.88 | 0.31 |
| 2  | 265  | 270 | 1.05 | 6.0  | 161.8 | 1.7 | 37.81 | 1.0 | 0.0813 | 4.1 | 0.136 | 25.41 | 0.0251 | 1.49 | 0.06 |
| 3  | 3939 | 623 | 0.16 | 92.6 | 174.0 | 1.1 | 36.54 | 0.7 | 0.0499 | 0.7 | 0.188 | 0.95  | 0.0274 | 0.66 | 0.70 |
| 4  | 341  | 161 | 0.49 | 6.6  | 142.1 | 1.5 | 44.69 | 1.0 | 0.0523 | 2.4 | 0.136 | 6.93  | 0.0222 | 1.07 | 0.15 |
| 5  | 781  | 449 | 0.59 | 17.4 | 165.3 | 1.3 | 38.51 | 0.8 | 0.0490 | 1.7 | 0.173 | 2.04  | 0.0259 | 0.79 | 0.39 |
| 6  | 532  | 382 | 0.74 | 11.9 | 165.4 | 1.4 | 38.47 | 0.8 | 0.0497 | 2.0 | 0.172 | 2.69  | 0.0259 | 0.85 | 0.32 |
| 7  | 606  | 648 | 1.10 | 13.9 | 168.4 | 1.5 | 37.46 | 0.9 | 0.0563 | 1.7 | 0.177 | 4.55  | 0.0264 | 0.91 | 0.20 |
| 8  | 327  | 147 | 0.46 | 5.5  | 123.8 | 1.6 | 51.18 | 1.2 | 0.0547 | 3.6 | 0.142 | 5.05  | 0.0195 | 1.25 | 0.25 |
| 9  | 475  | 274 | 0.60 | 10.5 | 164.2 | 1.5 | 38.79 | 0.9 | 0.0488 | 2.0 | 0.169 | 2.52  | 0.0257 | 0.92 | 0.37 |
| 10 | 377  | 181 | 0.50 | 8.6  | 168.7 | 1.6 | 37.73 | 1.0 | 0.0492 | 2.2 | 0.173 | 3.04  | 0.0264 | 0.97 | 0.32 |
| 11 | 460  | 439 | 0.99 | 11.0 | 176.3 | 3.8 | 35.91 | 2.2 | 0.0534 | 6.7 | 0.178 | 12.36 | 0.0276 | 2.22 | 0.18 |
| 12 | 895  | 958 | 1.11 | 19.9 | 163.5 | 2.6 | 38.69 | 1.6 | 0.0542 | 4.0 | 0.176 | 7.60  | 0.0257 | 1.60 | 0.21 |
| 13 | 328  | 182 | 0.57 | 7.1  | 161.0 | 2.8 | 39.41 | 1.7 | 0.0520 | 5.4 | 0.182 | 5.66  | 0.0254 | 1.74 | 0.31 |

TUK 44: 11S 730023E / 3697125N

|    |      |      |      |       |        |      |       |     |        |     |       |     |        |     |     |
|----|------|------|------|-------|--------|------|-------|-----|--------|-----|-------|-----|--------|-----|-----|
| 1  | 1491 | 2111 | 1.46 | 32.8  | 163.0  | 2.0  | 39.10 | 1.2 | 0.0487 | 1.8 | 0.171 | 2.2 | 0.0256 | 1.2 | 0.5 |
| 3  | 656  | 621  | 0.98 | 14.2  | 160.0  | 1.0  | 39.80 | 0.8 | 0.0483 | 2.8 | 0.165 | 3.3 | 0.0251 | 0.8 | 0.2 |
| 4  | 318  | 520  | 1.69 | 6.9   | 162.0  | 2.0  | 39.10 | 1.1 | 0.0538 | 3.7 | 0.181 | 5.2 | 0.0255 | 1.1 | 0.2 |
| 5  | 491  | 363  | 0.76 | 72.9  | 1029.0 | 7.0  | 5.70  | 0.7 | 0.0882 | 0.9 | 2.140 | 1.1 | 0.1761 | 0.7 | 0.6 |
| 6  | 499  | 132  | 0.27 | 130.3 | 1711.0 | 19.0 | 3.30  | 1.2 | 0.1060 | 0.6 | 4.451 | 1.3 | 0.3044 | 1.2 | 0.9 |
| 7  | 558  | 191  | 0.35 | 113.5 | 1369.0 | 29.0 | 4.20  | 2.2 | 0.0891 | 0.7 | 2.909 | 2.3 | 0.2371 | 2.2 | 1.0 |
| 8  | 746  | 266  | 0.37 | 17.1  | 170.0  | 1.0  | 37.40 | 0.8 | 0.0500 | 2.5 | 0.182 | 2.8 | 0.0267 | 0.8 | 0.3 |
| 9  | 627  | 464  | 0.76 | 14.1  | 166.0  | 2.0  | 38.30 | 0.9 | 0.0475 | 2.7 | 0.169 | 3.2 | 0.0261 | 0.9 | 0.3 |
| 10 | 493  | 630  | 1.32 | 11.0  | 166.0  | 2.0  | 38.40 | 1.1 | 0.0495 | 3.0 | 0.175 | 3.6 | 0.0260 | 1.1 | 0.3 |
| 11 | 332  | 254  | 0.79 | 7.3   | 163.0  | 2.0  | 39.00 | 1.1 | 0.0522 | 3.6 | 0.185 | 3.8 | 0.0256 | 1.1 | 0.3 |
| 12 | 501  | 204  | 0.42 | 104.7 | 1403.0 | 13.0 | 4.10  | 1.0 | 0.0896 | 0.7 | 3.009 | 1.2 | 0.2434 | 1.0 | 0.8 |

TUK 19: 11S 697707E / 3705739

|    |      |      |      |       |        |      |       |     |        |     |       |      |        |     |     |
|----|------|------|------|-------|--------|------|-------|-----|--------|-----|-------|------|--------|-----|-----|
| 1  | 318  | 467  | 1.52 | 56.0  | 1201.9 | 9.6  | 4.88  | 0.8 | 0.0798 | 0.7 | 2.250 | 1.1  | 0.2000 | 0.8 | 0.7 |
| 2  | 78   | 71   | 0.94 | 12.1  | 1069.2 | 12.9 | 5.51  | 1.2 | 0.0797 | 2.0 | 1.890 | 2.9  | 0.1800 | 1.3 | 0.4 |
| 3  | 226  | 91   | 0.41 | 57.7  | 1672.4 | 14.4 | 3.37  | 0.9 | 0.1040 | 1.0 | 4.240 | 1.4  | 0.3000 | 0.9 | 0.7 |
| 4  | 887  | 220  | 0.26 | 26.6  | 221.0  | 1.8  | 28.63 | 0.8 | 0.0517 | 1.3 | 0.240 | 1.8  | 0.0300 | 0.8 | 0.5 |
| 5  | 1056 | 372  | 0.36 | 23.8  | 167.2  | 1.4  | 38.07 | 0.8 | 0.0493 | 1.5 | 0.170 | 2.4  | 0.0300 | 0.8 | 0.4 |
| 6  | 792  | 192  | 0.25 | 212.9 | 1754.3 | 12.7 | 3.20  | 0.7 | 0.1078 | 1.0 | 4.640 | 1.2  | 0.3100 | 0.7 | 0.6 |
| 7  | 216  | 119  | 0.57 | 61.8  | 1860.0 | 17.9 | 3.01  | 0.9 | 0.1083 | 2.3 | 4.970 | 2.5  | 0.3300 | 0.9 | 0.4 |
| 8  | 300  | 103  | 0.35 | 59.1  | 1328.4 | 11.4 | 4.35  | 0.9 | 0.0890 | 0.7 | 2.820 | 1.1  | 0.2300 | 0.9 | 0.8 |
| 9  | 408  | 192  | 0.49 | 91.8  | 1510.5 | 13.8 | 3.82  | 0.9 | 0.0874 | 2.2 | 3.150 | 2.4  | 0.2600 | 0.9 | 0.4 |
| 10 | 2489 | 1792 | 0.74 | 61.9  | 169.1  | 1.6  | 34.57 | 0.7 | 0.1144 | 0.9 | 0.180 | 11.8 | 0.0300 | 0.9 | 0.1 |
| 11 | 299  | 113  | 0.39 | 63.0  | 1413.4 | 11.6 | 4.08  | 0.9 | 0.0891 | 0.7 | 3.000 | 1.1  | 0.2400 | 0.9 | 0.8 |
| 12 | 1768 | 1031 | 0.60 | 42.0  | 175.4  | 1.3  | 36.13 | 0.8 | 0.0523 | 1.3 | 0.200 | 1.5  | 0.0300 | 0.8 | 0.5 |
| 13 | 691  | 110  | 0.16 | 15.6  | 166.7  | 1.5  | 38.13 | 0.9 | 0.0505 | 1.8 | 0.180 | 2.2  | 0.0300 | 0.9 | 0.4 |
| 14 | 313  | 175  | 0.58 | 67.0  | 1435.2 | 11.8 | 4.01  | 0.9 | 0.0896 | 0.7 | 3.060 | 1.1  | 0.2500 | 0.9 | 0.8 |
| 15 | 286  | 108  | 0.39 | 6.3   | 162.7  | 1.9  | 39.14 | 1.2 | 0.0492 | 2.8 | 0.200 | 2.8  | 0.0300 | 1.2 | 0.4 |
| 16 | 1054 | 197  | 0.19 | 23.3  | 163.4  | 1.4  | 38.95 | 0.8 | 0.0493 | 1.4 | 0.170 | 2.2  | 0.0300 | 0.8 | 0.4 |
| 17 | 56   | 46   | 0.84 | 9.7   | 1181.0 | 15.6 | 4.97  | 1.4 | 0.0800 | 1.8 | 2.180 | 2.3  | 0.2000 | 1.4 | 0.6 |
| 18 | 820  | 190  | 0.24 | 18.2  | 162.5  | 1.4  | 38.82 | 0.9 | 0.0562 | 2.0 | 0.180 | 4.1  | 0.0300 | 0.9 | 0.2 |

1. Data reduction for geochronology follows the methods described by Williams (1996), and Ireland and Williams (2003), and uses the MS Excel add-in Squid and Isoplot programs of Ludwig (2001, 2008) using R33 (419 Ma) and Temora (416.8 Ma) standards as a references (Black et al., 2004).

Table DR4. Trace element geochemistry of zircon from Jurassic volcanic and plutonic rocks in the lower Colorado River region, Arizona and California

| Zircon                    | Y, ppm | La, ppm | Ce, ppm | Nd, ppm | Sm, ppm | Eu, ppm | Gd, ppm | Dy, ppm | Er, ppm | Yb, ppm | Hf, ppm | Th, ppm | U, ppm | Hf, ppm |
|---------------------------|--------|---------|---------|---------|---------|---------|---------|---------|---------|---------|---------|---------|--------|---------|
| <i>Dome Rock sequence</i> |        |         |         |         |         |         |         |         |         |         |         |         |        |         |
| TUK 40                    |        |         |         |         |         |         |         |         |         |         |         |         |        |         |
| 1                         | 579    | 0.02    | 10      | 0.76    | 1.5     | 0.97    | 12.9    | 57      | 113     | 217     | 6849    | 79      | 121    | 6849    |
| 2                         | 546    | 0.84    | 27      | 0.71    | 1.46    | 0.32    | 11.2    | 46      | 96      | 193     | 7021    | 131     | 248    | 7021    |
| 3                         | 2145   | 0.03    | 44      | 3.37    | 7.06    | 2.15    | 54.8    | 220     | 394     | 685     | 9458    | 372     | 342    | 9458    |
| 4                         | 997    | 0.02    | 31      | 0.86    | 2.18    | 0.8     | 19.7    | 89      | 191     | 387     | 9909    | 182     | 247    | 9909    |
| 5                         | 954    | 0.01    | 37      | 1.2     | 2.61    | 0.96    | 22.2    | 91      | 179     | 346     | 9274    | 258     | 278    | 9274    |
| 6                         | 1899   | 0.2     | 42      | 2.86    | 6.13    | 2.39    | 50.7    | 197     | 361     | 651     | 9011    | 326     | 419    | 9011    |
| 7                         | 772    | 0.01    | 36      | 0.62    | 1.76    | 0.47    | 15.9    | 73      | 148     | 290     | 10208   | 218     | 298    | 10208   |
| 8                         | 628    | 0.11    | 33      | 0.5     | 1.24    | 0.22    | 12.2    | 54      | 115     | 225     | 10666   | 364     | 534    | 10666   |
| 9                         | 843    | 0.44    | 31      | 1.21    | 2.58    | 0.79    | 21.2    | 83      | 155     | 277     | 7568    | 284     | 383    | 7568    |
| 10                        | 581    | 0.01    | 22      | 0.65    | 1.47    | 0.6     | 11.9    | 53      | 109     | 228     | 8488    | 172     | 195    | 8488    |
| 11                        | 379    | 1.72    | 20      | 0.69    | 1.09    | 0.34    | 8.7     | 32      | 67      | 131     | 5490    | 86      | 198    | 5490    |
| 12                        | 1168   | 0.01    | 46      | 1.31    | 3.26    | 0.9     | 27.1    | 118     | 220     | 391     | 9526    | 374     | 320    | 9526    |
| TUK 46                    |        |         |         |         |         |         |         |         |         |         |         |         |        |         |
| 1                         | 1002   | 0.01    | 26      | 0.29    | 1.04    | 0.7     | 12.2    | 67      | 183     | 490     | 10575   | 150     | 531    | 10575   |
| 2                         | 314    | 0.01    | 16      | 0.13    | 0.31    | 0.22    | 3.5     | 21      | 60      | 185     | 10555   | 126     | 332    | 10555   |
| 3                         | 273    | 0.14    | 7       | 0.07    | 0.16    | 0.14    | 2.1     | 17      | 56      | 214     | 12222   | 59      | 388    | 12222   |
| 4                         | 603    | 0.01    | 8       | 0.34    | 1.07    | 0.16    | 11.6    | 57      | 114     | 211     | 11153   | 39      | 104    | 11153   |
| 5                         | 1166   | 0       | 18      | 0.29    | 1.05    | 0.97    | 14      | 90      | 229     | 527     | 9079    | 70      | 262    | 9079    |
| 6                         | 612    | 0.01    | 33      | 0.23    | 0.56    | 0.5     | 6.9     | 39      | 119     | 355     | 10357   | 267     | 576    | 10357   |
| 7                         | 622    | 0.02    | 14      | 0.44    | 1.11    | 0.55    | 11.1    | 50      | 120     | 282     | 9532    | 88      | 194    | 9532    |
| 8                         | 1784   | 0.04    | 12      | 1.61    | 4.33    | 0.61    | 39.7    | 167     | 313     | 518     | 9952    | 203     | 329    | 9952    |
| 9                         | 700    | 0.01    | 15      | 1.21    | 2.51    | 1.71    | 19.4    | 67      | 119     | 227     | 8732    | 40      | 59     | 8732    |
| 10                        | 658    | 0.01    | 13      | 0.69    | 2.03    | 0.23    | 16.2    | 68      | 123     | 207     | 10173   | 60      | 103    | 10173   |
| 11                        | 252    | 0.01    | 11      | 0.05    | 0.26    | 0.16    | 2.8     | 16      | 48      | 150     | 12811   | 80      | 330    | 12811   |
| 12                        | 1231   | 0.02    | 15      | 1.16    | 3.26    | 0.3     | 31.7    | 125     | 221     | 366     | 11283   | 132     | 185    | 11283   |
| 13                        | 628    | 0       | 15      | 0.13    | 0.63    | 0.5     | 8.3     | 50      | 124     | 336     | 14089   | 49      | 1041   | 14089   |
| 14                        | 2022   | 0.02    | 46      | 1.77    | 4.27    | 3.37    | 47.7    | 202     | 376     | 673     | 8548    | 134     | 142    | 8548    |
| 15                        | 1920   | 0.11    | 18      | 0.33    | 1.08    | 0.14    | 15.4    | 120     | 405     | 1281    | 18604   | 401     | 3103   | 18604   |
| TUK 81                    |        |         |         |         |         |         |         |         |         |         |         |         |        |         |
| 1                         | 253    | 0.01    | 17      | 0.13    | 0.29    | 0.23    | 3.4     | 16      | 50      | 153     | 11308   | 83      | 223    | 11308   |
| 2                         | 380    | 0.04    | 23      | 0.16    | 0.31    | 0.3     | 4.3     | 24      | 74      | 230     | 11071   | 109     | 257    | 11071   |
| 3                         | 481    | 0.01    | 24      | 0.13    | 0.46    | 0.34    | 4.9     | 27      | 95      | 303     | 10634   | 99      | 282    | 10634   |
| 4                         | 667    | 0.01    | 33      | 0.15    | 0.33    | 0.31    | 5.4     | 34      | 126     | 448     | 13793   | 246     | 632    | 13793   |
| 5                         | 506    | 0.01    | 24      | 0.19    | 0.38    | 0.33    | 5.4     | 32      | 102     | 329     | 11337   | 95      | 285    | 11337   |
| 6                         | 343    | 0.03    | 18      | 0.12    | 0.28    | 0.2     | 3.2     | 20      | 69      | 228     | 11709   | 73      | 217    | 11709   |
| 7                         | 332    | 0.01    | 28      | 0.5     | 1.12    | 0.39    | 7.3     | 30      | 60      | 125     | 10950   | 91      | 80     | 10950   |
| 8                         | 1321   | 0.07    | 22      | 0.52    | 1.62    | 0.31    | 19.5    | 114     | 250     | 493     | 12551   | 433     | 2450   | 12551   |
| 9                         | 584    | 0.04    | 21      | 0.95    | 1.42    | 0.46    | 12.6    | 55      | 109     | 211     | 10041   | 60      | 132    | 10041   |
| 10                        | 349    | 0.03    | 3       | 0.07    | 0.17    | 0.22    | 3.4     | 25      | 76      | 196     | 10532   | 13      | 42     | 10532   |
| 11                        | 325    | 0.02    | 4       | 0.47    | 1.84    | 0.15    | 12.7    | 36      | 53      | 106     | 14132   | 98      | 815    | 14132   |
| 12                        | 627    | 0.02    | 20      | 0.18    | 0.77    | 0.74    | 10.2    | 49      | 119     | 277     | 10028   | 128     | 271    | 10028   |
| 13                        | 827    | 0.01    | 42      | 0.31    | 0.72    | 0.54    | 8.9     | 52      | 158     | 472     | 10424   | 204     | 450    | 10424   |
| 14                        | 500    | 0.02    | 24      | 0.15    | 0.51    | 0.36    | 5.5     | 31      | 101     | 323     | 11472   | 109     | 322    | 11472   |
| 15                        | 963    | 0.02    | 13      | 1.07    | 2.81    | 0.34    | 25      | 99      | 176     | 297     | 10327   | 88      | 150    | 10327   |
| 16                        | 382    | 0.04    | 22      | 0.17    | 0.36    | 0.31    | 4.7     | 26      | 75      | 225     | 10822   | 131     | 274    | 10822   |
| 17                        | 512    | 0.01    | 20      | 0.14    | 0.33    | 0.32    | 4.8     | 29      | 101     | 328     | 10864   | 79      | 283    | 10864   |
| 18                        | 497    | 0.02    | 21      | 0.19    | 0.5     | 0.37    | 5.3     | 31      | 97      | 297     | 11129   | 91      | 280    | 11129   |
| 19                        | 402    | 0.03    | 19      | 0.14    | 0.31    | 0.3     | 4.1     | 25      | 78      | 248     | 12254   | 75      | 293    | 12254   |
| 20                        | 519    | 0.02    | 22      | 0.12    | 0.37    | 0.34    | 4.9     | 30      | 102     | 335     | 11509   | 94      | 299    | 11509   |
| 21                        | 477    | 0.01    | 17      | 0.1     | 0.37    | 0.36    | 4.7     | 29      | 93      | 274     | 10472   | 54      | 176    | 10472   |

## TUK 83

|    |      |       |    |      |      |      |      |     |     |     |       |     |     |       |
|----|------|-------|----|------|------|------|------|-----|-----|-----|-------|-----|-----|-------|
| 1  | 1300 | 0.017 | 41 | 1.12 | 2.7  | 0.65 | 25.4 | 120 | 248 | 478 | 10085 | 353 | 426 | 10085 |
| 2  | 630  | 0.006 | 29 | 0.24 | 0.83 | 0.21 | 8.7  | 51  | 122 | 266 | 11382 | 270 | 497 | 11382 |
| 3  | 1015 | 0.012 | 55 | 0.66 | 1.74 | 0.32 | 16.6 | 86  | 199 | 413 | 11149 | 373 | 598 | 11149 |
| 4  | 1098 | 0.009 | 46 | 0.72 | 1.99 | 0.39 | 17.9 | 98  | 219 | 448 | 11139 | 439 | 720 | 11139 |
| 5  | 1089 | 0.008 | 58 | 0.63 | 1.95 | 0.43 | 17.6 | 97  | 214 | 450 | 10886 | 503 | 706 | 10886 |
| 6  | 1261 | 0.589 | 55 | 0.96 | 1.67 | 0.36 | 15.5 | 99  | 256 | 649 | 12164 | 422 | 902 | 12164 |
| 7  | 1617 | 0.053 | 68 | 1.05 | 2.46 | 0.62 | 28.9 | 140 | 313 | 612 | 11651 | 578 | 764 | 11651 |
| 8  | 1036 | 0.189 | 46 | 0.57 | 1.43 | 0.31 | 14.8 | 92  | 200 | 427 | 10531 | 267 | 475 | 10531 |
| 9  | 928  | 0     | 38 | 0.51 | 1.25 | 0.23 | 14.8 | 86  | 180 | 369 | 11613 | 438 | 823 | 11613 |
| 10 | 1885 | 0.022 | 47 | 2.46 | 4.74 | 1.02 | 38.5 | 180 | 356 | 686 | 10618 | 542 | 668 | 10618 |

## TUK 18

|    |      |       |    |      |      |      |      |     |     |     |       |     |     |       |
|----|------|-------|----|------|------|------|------|-----|-----|-----|-------|-----|-----|-------|
| 2  | 840  | 0.061 | 43 | 0.44 | 1.11 | 0.28 | 12.3 | 72  | 167 | 358 | 10391 | 262 | 452 | 10391 |
| 3  | 1071 | 0     | 65 | 0.7  | 1.55 | 0.4  | 14.7 | 82  | 212 | 480 | 10697 | 541 | 755 | 10697 |
| 4  | 739  | 0.011 | 37 | 0.35 | 0.9  | 0.23 | 11.4 | 63  | 153 | 325 | 11161 | 186 | 333 | 11161 |
| 5  | 1004 | 0.009 | 38 | 0.81 | 1.79 | 0.4  | 19   | 84  | 202 | 419 | 10595 | 313 | 513 | 10595 |
| 6  | 981  | 0.003 | 48 | 0.5  | 1.42 | 0.4  | 15.1 | 78  | 190 | 433 | 9963  | 264 | 419 | 9963  |
| 7  | 1008 | 0     | 52 | 0.85 | 1.95 | 0.49 | 17.1 | 91  | 193 | 400 | 10683 | 443 | 615 | 10683 |
| 8  | 1528 | 0.006 | 50 | 1.22 | 3.43 | 0.8  | 31.9 | 139 | 298 | 571 | 10725 | 424 | 523 | 10725 |
| 9  | 1005 | 0.021 | 47 | 0.63 | 1.61 | 0.38 | 17.1 | 89  | 191 | 403 | 11093 | 385 | 605 | 11093 |
| 10 | 1048 | 0.056 | 42 | 1.06 | 1.69 | 0.44 | 18.4 | 94  | 205 | 422 | 10437 | 363 | 546 | 10437 |
| 11 | 1860 | 0.012 | 67 | 3.7  | 6.35 | 2.71 | 50   | 201 | 350 | 635 | 10220 | 489 | 370 | 10220 |
| 12 | 759  | 0.015 | 33 | 0.3  | 0.97 | 0.32 | 10.1 | 66  | 150 | 325 | 10180 | 189 | 352 | 10180 |

## TUK 88

|    |      |       |     |       |      |       |       |     |      |      |       |      |      |       |
|----|------|-------|-----|-------|------|-------|-------|-----|------|------|-------|------|------|-------|
| 1  | 5143 | 0.07  | 301 | 3.4   | 9.85 | 3.5   | 99.4  | 453 | 954  | 1858 | 8473  | 2863 | 1812 | 8473  |
| 2  | 908  | 0.01  | 59  | 0.59  | 1.55 | 0.55  | 14.3  | 72  | 172  | 396  | 11645 | 508  | 594  | 11645 |
| 3  | 891  | 0.02  | 46  | 0.51  | 1.71 | 0.43  | 17.7  | 83  | 179  | 366  | 12155 | 351  | 523  | 12155 |
| 4  | 953  | 0.01  | 44  | 0.64  | 1.83 | 0.43  | 17.4  | 84  | 181  | 374  | 11477 | 356  | 523  | 11477 |
| 5  | 975  | 0.01  | 65  | 0.72  | 1.98 | 0.5   | 17.8  | 85  | 184  | 376  | 11792 | 320  | 407  | 11792 |
| 6  | 6393 | 0.19  | 504 | 13.63 | 25.1 | 10.67 | 183.3 | 640 | 1140 | 2215 | 9126  | 6210 | 2221 | 9126  |
| 7  | 904  | 0.01  | 38  | 0.74  | 1.8  | 0.55  | 17.7  | 79  | 168  | 341  | 11332 | 270  | 395  | 11332 |
| 8  | 1262 | 0.01  | 36  | 0.79  | 2.48 | 0.59  | 23.5  | 112 | 243  | 478  | 10713 | 306  | 591  | 10713 |
| 9  | 1009 | 0.01  | 52  | 0.71  | 1.95 | 0.64  | 19    | 88  | 188  | 400  | 11823 | 444  | 447  | 11823 |
| 10 | 719  | 0.01  | 43  | 0.34  | 1.21 | 0.52  | 11.7  | 58  | 137  | 307  | 10733 | 143  | 198  | 10733 |
| 11 | 1332 | 0.48  | 46  | 1.32  | 3.09 | 0.89  | 30.1  | 124 | 241  | 442  | 10618 | 315  | 316  | 10618 |
| 12 | 871  | 0.01  | 39  | 0.58  | 1.59 | 0.39  | 16.2  | 77  | 164  | 338  | 11718 | 284  | 427  | 11718 |
| 13 | 652  | 0.01  | 22  | 0.43  | 1.3  | 0.93  | 13    | 58  | 124  | 265  | 8990  | 70   | 82   | 8990  |
| 14 | 1477 | 0.01  | 90  | 1.04  | 2.6  | 0.83  | 27.7  | 129 | 277  | 564  | 11946 | 427  | 491  | 11946 |
| 15 | 952  | 0.02  | 28  | 0.8   | 1.94 | 0.58  | 16.9  | 82  | 182  | 382  | 10610 | 179  | 295  | 10610 |
| 16 | 1059 | 22.36 | 109 | 14.47 | 4.79 | 0.7   | 23.7  | 93  | 196  | 401  | 11484 | 421  | 577  | 11484 |
| 17 | 1054 | 0.01  | 79  | 0.98  | 2.16 | 0.78  | 21.5  | 97  | 200  | 397  | 10850 | 398  | 400  | 10850 |
| 18 | 816  | 0.01  | 58  | 0.63  | 1.78 | 0.45  | 14.6  | 73  | 155  | 319  | 10780 | 268  | 319  | 10780 |
| 19 | 995  | 0.01  | 48  | 0.64  | 1.79 | 0.48  | 17.7  | 85  | 191  | 396  | 12189 | 339  | 508  | 12189 |
| 20 | 1164 | 0.01  | 50  | 0.91  | 2.45 | 0.6   | 22    | 103 | 212  | 414  | 11481 | 499  | 560  | 11481 |

## TUK 40

|    |      |      |    |      |      |      |      |     |     |     |       |     |     |       |
|----|------|------|----|------|------|------|------|-----|-----|-----|-------|-----|-----|-------|
| 1  | 579  | 0.02 | 10 | 0.76 | 1.5  | 0.97 | 12.9 | 57  | 113 | 217 | 6849  | 79  | 121 | 6849  |
| 2  | 546  | 0.84 | 27 | 0.71 | 1.46 | 0.32 | 11.2 | 46  | 96  | 193 | 7021  | 131 | 248 | 7021  |
| 3  | 2145 | 0.03 | 44 | 3.37 | 7.06 | 2.15 | 54.8 | 220 | 394 | 685 | 9458  | 372 | 342 | 9458  |
| 4  | 997  | 0.02 | 31 | 0.86 | 2.18 | 0.8  | 19.7 | 89  | 191 | 387 | 9909  | 182 | 247 | 9909  |
| 5  | 954  | 0.01 | 37 | 1.2  | 2.61 | 0.96 | 22.2 | 91  | 179 | 346 | 9274  | 258 | 278 | 9274  |
| 6  | 1899 | 0.2  | 42 | 2.86 | 6.13 | 2.39 | 50.7 | 197 | 361 | 651 | 9011  | 326 | 419 | 9011  |
| 7  | 772  | 0.01 | 36 | 0.62 | 1.76 | 0.47 | 15.9 | 73  | 148 | 291 | 10208 | 218 | 298 | 10208 |
| 8  | 628  | 0.11 | 33 | 0.5  | 1.24 | 0.22 | 12.2 | 54  | 115 | 225 | 10666 | 365 | 534 | 10666 |
| 9  | 843  | 0.44 | 31 | 1.21 | 2.58 | 0.79 | 21.2 | 83  | 155 | 277 | 7568  | 284 | 383 | 7568  |
| 10 | 581  | 0.01 | 22 | 0.65 | 1.47 | 0.6  | 11.9 | 53  | 109 | 228 | 8488  | 172 | 195 | 8488  |
| 11 | 379  | 1.72 | 20 | 0.69 | 1.09 | 0.34 | 8.7  | 32  | 67  | 131 | 5490  | 86  | 198 | 5490  |

|    |      |      |    |      |      |     |      |     |     |     |      |     |     |      |
|----|------|------|----|------|------|-----|------|-----|-----|-----|------|-----|-----|------|
| 12 | 1168 | 0.01 | 46 | 1.31 | 3.26 | 0.9 | 27.1 | 118 | 220 | 391 | 9526 | 374 | 320 | 9526 |
|----|------|------|----|------|------|-----|------|-----|-----|-----|------|-----|-----|------|

Araz Wash diorite unit

PT-291

|    |      |      |    |      |      |      |      |     |     |     |       |     |     |       |
|----|------|------|----|------|------|------|------|-----|-----|-----|-------|-----|-----|-------|
| 1  | 676  | 0    | 35 | 0.32 | 0.95 | 0.28 | 10.4 | 54  | 125 | 272 | 10795 | 223 | 354 | 10795 |
| 2  | 1341 | 0.03 | 37 | 1.72 | 3.57 | 1.11 | 30   | 121 | 242 | 453 | 9019  | 364 | 319 | 9019  |
| 3  | 970  | 0.01 | 57 | 0.55 | 1.66 | 0.41 | 16.6 | 80  | 183 | 389 | 11579 | 444 | 586 | 11579 |
| 4  | 703  | 0.01 | 36 | 0.46 | 1.41 | 0.33 | 13.1 | 61  | 128 | 265 | 13527 | 221 | 267 | 13527 |
| 5  | 896  | 0.03 | 32 | 0.4  | 1.4  | 0.38 | 14.4 | 76  | 172 | 382 | 12738 | 179 | 293 | 12738 |
| 6  | 758  | 0.01 | 27 | 0.52 | 1.62 | 0.46 | 14.3 | 68  | 139 | 279 | 11107 | 146 | 183 | 11107 |
| 7  | 735  | 0.11 | 43 | 0.43 | 0.98 | 0.28 | 11.6 | 61  | 144 | 314 | 12081 | 189 | 303 | 12081 |
| 8  | 1450 | 0.09 | 71 | 1.2  | 2.94 | 0.77 | 26.8 | 123 | 265 | 527 | 12168 | 590 | 629 | 12168 |
| 9  | 955  | 0.04 | 31 | 1.14 | 2.43 | 0.55 | 21.3 | 90  | 172 | 316 | 10301 | 276 | 304 | 10301 |
| 10 | 875  | 0.55 | 48 | 0.85 | 1.52 | 0.4  | 14.6 | 74  | 167 | 358 | 12466 | 296 | 427 | 12466 |
| 11 | 848  | 0.02 | 35 | 0.35 | 1.04 | 0.25 | 12.1 | 70  | 165 | 360 | 12519 | 238 | 379 | 12519 |
| 12 | 894  | 0.02 | 38 | 0.97 | 2.25 | 0.67 | 19.1 | 80  | 156 | 300 | 10315 | 292 | 288 | 10315 |

TUK 57

|    |      |      |     |      |      |      |      |     |     |      |       |      |      |       |
|----|------|------|-----|------|------|------|------|-----|-----|------|-------|------|------|-------|
| 1  | 748  | 0.02 | 41  | 0.38 | 1.2  | 0.52 | 12.3 | 61  | 147 | 342  | 10740 | 162  | 265  | 10740 |
| 2  | 1468 | 0.13 | 53  | 3.49 | 5.59 | 0.88 | 37.3 | 141 | 270 | 551  | 10832 | 812  | 809  | 10832 |
| 3  | 74   | 0.01 | 8   | 0.03 | 0.07 | 0.07 | 0.7  | 5   | 15  | 51   | 9822  | 72   | 335  | 9822  |
| 4  | 174  | 1    | 16  | 0.1  | 0.18 | 0.11 | 2    | 12  | 38  | 117  | 12972 | 100  | 698  | 12972 |
| 5  | 3105 | 0.04 | 116 | 1.85 | 6.32 | 4.28 | 71   | 302 | 574 | 1036 | 9382  | 1302 | 2121 | 9382  |
| 6  | 927  | 0.03 | 62  | 0.55 | 1.43 | 0.71 | 14.9 | 73  | 180 | 465  | 10562 | 710  | 746  | 10562 |
| 7  | 211  | 0.02 | 20  | 0.22 | 0.44 | 0.14 | 4.3  | 18  | 39  | 102  | 10870 | 293  | 905  | 10870 |
| 8  | 1198 | 0.02 | 73  | 1.06 | 2.75 | 0.51 | 23.4 | 106 | 232 | 560  | 15986 | 1441 | 2236 | 15986 |
| 9  | 558  | 0.02 | 36  | 0.42 | 0.95 | 0.49 | 10   | 46  | 109 | 260  | 10424 | 215  | 308  | 10424 |
| 10 | 820  | 0.02 | 39  | 0.55 | 1.4  | 0.7  | 14.3 | 71  | 162 | 388  | 9860  | 159  | 280  | 9860  |
| 11 | 422  | 0.02 | 27  | 0.29 | 0.81 | 0.34 | 7.6  | 34  | 82  | 215  | 10072 | 154  | 249  | 10072 |
| 12 | 240  | 0.02 | 22  | 0.12 | 0.23 | 0.09 | 2.6  | 16  | 48  | 163  | 15810 | 107  | 1559 | 15810 |
| 13 | 309  | 4.15 | 34  | 0.49 | 0.72 | 0.2  | 6    | 26  | 61  | 163  | 8573  | 190  | 1187 | 8573  |
| 14 | 684  | 0.06 | 7   | 0.2  | 0.85 | 0.15 | 8.9  | 56  | 128 | 326  | 12368 | 186  | 1296 | 12368 |
| 15 | 456  | 0.5  | 28  | 0.68 | 1.29 | 0.25 | 10.4 | 40  | 81  | 177  | 8387  | 157  | 255  | 8387  |

TUK 58

|    |      |      |    |      |      |      |      |     |     |     |       |      |     |       |
|----|------|------|----|------|------|------|------|-----|-----|-----|-------|------|-----|-------|
| 1  | 789  | 0.04 | 27 | 0.35 | 0.89 | 0.66 | 9.7  | 51  | 145 | 453 | 13132 | 1340 | 554 | 13132 |
| 2  | 1015 | 0.04 | 13 | 1.44 | 3.24 | 0.31 | 27.1 | 107 | 182 | 302 | 10147 | 181  | 87  | 10147 |
| 3  | 412  | 0.02 | 7  | 0.26 | 0.87 | 0.37 | 7.5  | 34  | 75  | 180 | 10364 | 201  | 49  | 10364 |
| 4  | 468  | 0.03 | 13 | 0.28 | 0.66 | 0.07 | 7    | 38  | 88  | 189 | 13221 | 125  | 151 | 13221 |
| 5  | 1069 | 0.03 | 20 | 0.15 | 0.66 | 0.6  | 11.8 | 78  | 202 | 471 | 11958 | 785  | 224 | 11958 |
| 6  | 255  | 0.01 | 17 | 0.08 | 0.24 | 0.21 | 3.2  | 16  | 49  | 152 | 10750 | 366  | 140 | 10750 |
| 7  | 448  | 0.05 | 18 | 0.17 | 0.48 | 0.13 | 5.3  | 30  | 82  | 231 | 10975 | 313  | 87  | 10975 |
| 8  | 1055 | 0.02 | 27 | 0.6  | 1.92 | 0.04 | 19.5 | 99  | 191 | 365 | 13218 | 751  | 242 | 13218 |
| 9  | 186  | 1.12 | 14 | 0.13 | 0.19 | 0.16 | 2.5  | 12  | 33  | 108 | 7101  | 295  | 90  | 7101  |
| 10 | 517  | 0.04 | 27 | 0.22 | 0.69 | 0.11 | 7.4  | 39  | 97  | 247 | 11850 | 412  | 151 | 11850 |

TUK 87

|    |      |      |     |      |       |      |       |     |      |      |       |       |      |       |
|----|------|------|-----|------|-------|------|-------|-----|------|------|-------|-------|------|-------|
| 1  | 5610 | 0.05 | 447 | 6.22 | 15.86 | 7.15 | 138.7 | 521 | 962  | 1849 | 8592  | 3561  | 1958 | 8592  |
| 2  | 2099 | 0.06 | 67  | 2.06 | 6.35  | 2.53 | 55.4  | 155 | 347  | 859  | 8011  | 16187 | 2365 | 8011  |
| 3  | 4770 | 0.08 | 202 | 4.66 | 10.79 | 4.95 | 102.1 | 417 | 857  | 1761 | 7810  | 2323  | 1551 | 7810  |
| 4  | 6969 | 0.08 | 345 | 7.12 | 17.19 | 7.16 | 160.1 | 661 | 1237 | 2255 | 8898  | 3828  | 2075 | 8898  |
| 5  | 5770 | 0.05 | 436 | 6.34 | 16.39 | 6.59 | 146.5 | 553 | 1001 | 1858 | 10053 | 3717  | 1990 | 10053 |
| 6  | 1212 | 0.02 | 61  | 0.71 | 2.11  | 0.44 | 20.1  | 106 | 224  | 438  | 12911 | 371   | 522  | 12911 |
| 7  | 925  | 0.06 | 47  | 0.52 | 1.45  | 0.56 | 14.5  | 72  | 179  | 435  | 9386  | 310   | 1200 | 9386  |
| 8  | 2195 | 0.11 | 72  | 1.07 | 1.8   | 0.7  | 18.4  | 126 | 442  | 1220 | 10272 | 938   | 1822 | 10272 |
| 9  | 1642 | 0.04 | 23  | 0.02 | 0.14  | 0.07 | 4.8   | 77  | 371  | 1062 | 9884  | 135   | 1690 | 9884  |
| 10 | 1015 | 0.03 | 65  | 0.8  | 2     | 0.75 | 19    | 86  | 192  | 455  | 8324  | 812   | 2616 | 8324  |
| 11 | 1156 | 0.02 | 78  | 0.96 | 2.36  | 0.66 | 21.3  | 101 | 210  | 416  | 11160 | 485   | 493  | 11160 |
| 12 | 5665 | 0.12 | 455 | 6.63 | 16.24 | 7.27 | 147.4 | 539 | 943  | 1701 | 10165 | 4889  | 1990 | 10165 |

|    |      |      |     |      |       |      |       |     |      |      |       |      |      |       |
|----|------|------|-----|------|-------|------|-------|-----|------|------|-------|------|------|-------|
| 13 | 5117 | 0.04 | 429 | 6.43 | 16.26 | 7.25 | 138.9 | 488 | 835  | 1496 | 9164  | 4913 | 1673 | 9164  |
| 14 | 5904 | 0.05 | 461 | 7.09 | 18.4  | 7.58 | 150.7 | 586 | 1056 | 1913 | 9799  | 4486 | 2383 | 9799  |
| 15 | 5010 | 0.09 | 387 | 5.64 | 14.34 | 5.99 | 130.6 | 479 | 854  | 1528 | 10214 | 3385 | 1773 | 10214 |
| 16 | 4544 | 0.14 | 339 | 4.9  | 12.65 | 5.34 | 117.2 | 440 | 778  | 1380 | 10030 | 3509 | 2098 | 10030 |
| 17 | 1058 | 0.03 | 33  | 0.1  | 0.4   | 0.24 | 6.1   | 56  | 232  | 733  | 9585  | 226  | 1936 | 9585  |
| 18 | 2136 | 0.05 | 120 | 0.71 | 1.54  | 0.83 | 19.8  | 134 | 432  | 1010 | 10085 | 630  | 1716 | 10085 |
| 19 | 1474 | 0.1  | 120 | 1.39 | 3.87  | 1.62 | 34.2  | 135 | 259  | 561  | 10996 | 1071 | 965  | 10996 |
| 20 | 2348 | 0.03 | 54  | 0.24 | 0.56  | 0.27 | 10    | 112 | 479  | 1313 | 8557  | 331  | 2069 | 8557  |

*Middle Camp porphyritic granodiorite unit*

TUK 42

|    |      |      |    |      |      |      |      |     |     |     |       |     |     |       |
|----|------|------|----|------|------|------|------|-----|-----|-----|-------|-----|-----|-------|
| 1  | 449  | 0.01 | 34 | 0.17 | 0.66 | 0.21 | 6.5  | 33  | 87  | 226 | 12046 | 222 | 381 | 12046 |
| 2  | 703  | 0.01 | 26 | 0.66 | 1.78 | 0.71 | 15   | 63  | 130 | 270 | 8733  | 122 | 152 | 8733  |
| 3  | 722  | 0.02 | 50 | 0.45 | 1.19 | 0.42 | 12.2 | 63  | 140 | 320 | 10974 | 395 | 517 | 10974 |
| 4  | 720  | 0.01 | 39 | 0.28 | 1.15 | 0.4  | 12.7 | 64  | 140 | 290 | 11316 | 194 | 240 | 11316 |
| 5  | 953  | 0.01 | 43 | 0.61 | 1.67 | 0.5  | 16.8 | 82  | 184 | 395 | 10745 | 255 | 331 | 10745 |
| 6  | 978  | 0.02 | 69 | 0.91 | 2.55 | 0.86 | 23.3 | 98  | 186 | 355 | 10098 | 418 | 366 | 10098 |
| 7  | 622  | 0.02 | 44 | 0.27 | 0.8  | 0.21 | 7.6  | 44  | 120 | 308 | 12268 | 352 | 552 | 12268 |
| 8  | 817  | 0.04 | 55 | 0.36 | 0.98 | 0.27 | 9.8  | 54  | 159 | 457 | 12305 | 474 | 935 | 12305 |
| 9  | 1505 | 0.01 | 67 | 0.99 | 2.8  | 0.78 | 28.3 | 136 | 290 | 592 | 11607 | 565 | 630 | 11607 |
| 10 | 464  | 0.01 | 32 | 0.16 | 0.57 | 0.21 | 6.8  | 37  | 90  | 202 | 12419 | 139 | 257 | 12419 |

TUK 86

|    |      |      |     |      |       |      |       |     |     |      |       |      |      |       |
|----|------|------|-----|------|-------|------|-------|-----|-----|------|-------|------|------|-------|
| 1  | 888  | 1.85 | 63  | 1.67 | 1.8   | 0.74 | 18    | 83  | 170 | 322  | 10392 | 155  | 198  | 10392 |
| 2  | 767  | 0.06 | 16  | 2.62 | 3.44  | 1.53 | 22.9  | 73  | 133 | 262  | 8199  | 163  | 120  | 8199  |
| 3  | 897  | 0.01 | 55  | 0.45 | 1.28  | 0.31 | 13.4  | 69  | 166 | 369  | 12231 | 475  | 698  | 12231 |
| 4  | 1675 | 0.02 | 69  | 1.6  | 3.53  | 1.6  | 28.5  | 139 | 308 | 626  | 8670  | 408  | 403  | 8670  |
| 5  | 596  | 0.02 | 19  | 0.81 | 1.88  | 0.37 | 16.2  | 57  | 102 | 178  | 10216 | 134  | 131  | 10216 |
| 6  | 1052 | 0.01 | 86  | 1.33 | 2.87  | 1.21 | 25.6  | 102 | 193 | 356  | 10030 | 370  | 297  | 10030 |
| 7  | 541  | 0.03 | 29  | 0.94 | 1.8   | 0.96 | 14.1  | 51  | 96  | 182  | 8458  | 98   | 82   | 8458  |
| 8  | 433  | 0.01 | 21  | 0.31 | 0.92  | 0.29 | 10    | 41  | 80  | 155  | 10635 | 110  | 134  | 10635 |
| 9  | 1102 | 0.03 | 56  | 1.49 | 3.37  | 1.6  | 26.6  | 104 | 206 | 395  | 8611  | 161  | 160  | 8611  |
| 10 | 1247 | 0.02 | 58  | 1.4  | 2.96  | 1.62 | 26.6  | 116 | 229 | 442  | 8585  | 178  | 150  | 8585  |
| 11 | 3905 | 0.06 | 177 | 6.33 | 12.1  | 2.87 | 93.7  | 376 | 716 | 1351 | 9521  | 1601 | 2583 | 9521  |
| 12 | 1101 | 0.01 | 59  | 0.58 | 2.04  | 0.36 | 18.5  | 96  | 206 | 400  | 12353 | 399  | 558  | 12353 |
| 13 | 3840 | 0.05 | 182 | 7.8  | 15.08 | 6.13 | 113   | 382 | 647 | 1049 | 9835  | 809  | 498  | 9835  |
| 14 | 2986 | 0.12 | 107 | 8.51 | 15.39 | 7.98 | 112.8 | 343 | 531 | 831  | 8766  | 523  | 271  | 8766  |
| 15 | 1432 | 0.02 | 81  | 1.04 | 2.91  | 0.7  | 28    | 132 | 263 | 493  | 12144 | 610  | 671  | 12144 |
| 16 | 1405 | 0.04 | 50  | 3.02 | 5.75  | 2.6  | 42    | 145 | 246 | 426  | 8616  | 283  | 210  | 8616  |
| 17 | 3685 | 0.02 | 224 | 2.91 | 8.43  | 1.87 | 85.5  | 357 | 654 | 1159 | 10156 | 1232 | 860  | 10156 |
| 18 | 1125 | 0.02 | 78  | 1.2  | 2.72  | 1.22 | 25.6  | 106 | 210 | 395  | 10882 | 396  | 407  | 10882 |
| 19 | 581  | 0.01 | 18  | 0.69 | 1.38  | 0.41 | 12.6  | 51  | 104 | 199  | 10614 | 82   | 112  | 10614 |
| 20 | 1107 | 1.98 | 77  | 2.49 | 2.95  | 1.01 | 23.7  | 104 | 204 | 374  | 11042 | 459  | 445  | 11042 |

TM 650

|    |      |      |     |      |      |      |      |     |     |      |       |      |      |       |
|----|------|------|-----|------|------|------|------|-----|-----|------|-------|------|------|-------|
| 1  | 673  | 0.02 | 42  | 0.36 | 0.98 | 0.34 | 10.7 | 57  | 130 | 289  | 12160 | 213  | 350  | 12160 |
| 2  | 865  | 0.02 | 56  | 1.38 | 3.08 | 0.96 | 22.4 | 83  | 157 | 303  | 10781 | 400  | 500  | 10781 |
| 3  | 1317 | 0.02 | 10  | 2.25 | 4.78 | 1.31 | 37.7 | 140 | 244 | 407  | 8195  | 85   | 145  | 8195  |
| 4  | 937  | 0.02 | 58  | 0.59 | 1.6  | 0.47 | 15.6 | 79  | 178 | 386  | 12305 | 354  | 522  | 12305 |
| 5  | 1031 | 0.02 | 69  | 0.78 | 1.97 | 0.68 | 19.9 | 92  | 195 | 395  | 12560 | 489  | 614  | 12560 |
| 6  | 137  | 0.02 | 16  | 0.08 | 0.16 | 0.11 | 1.8  | 10  | 25  | 76   | 11298 | 140  | 294  | 11298 |
| 7  | 293  | 0.02 | 22  | 0.14 | 0.31 | 0.13 | 4.2  | 23  | 59  | 133  | 12435 | 70   | 161  | 12435 |
| 8  | 3828 | 0.04 | 325 | 4.22 | 10.7 | 4.87 | 94.6 | 378 | 706 | 1315 | 8930  | 2359 | 1608 | 8930  |
| 9  | 955  | 0.01 | 58  | 0.56 | 1.63 | 0.48 | 15.9 | 81  | 184 | 387  | 12210 | 398  | 565  | 12210 |
| 10 | 1153 | 0.06 | 52  | 0.69 | 2.08 | 0.62 | 22.8 | 100 | 216 | 430  | 12087 | 370  | 437  | 12087 |
| 11 | 1893 | 0.02 | 72  | 2.43 | 6.57 | 2.4  | 54.2 | 200 | 343 | 557  | 10792 | 393  | 276  | 10792 |
| 12 | 942  | 0.02 | 58  | 0.71 | 1.65 | 0.52 | 16.4 | 79  | 176 | 367  | 11174 | 365  | 526  | 11174 |
| 13 | 926  | 0.01 | 55  | 0.47 | 1.64 | 0.49 | 15.4 | 78  | 176 | 373  | 12722 | 320  | 482  | 12722 |
| 14 | 846  | 0.01 | 53  | 0.4  | 1.44 | 0.44 | 15   | 71  | 161 | 337  | 12589 | 316  | 480  | 12589 |



|    |      |      |    |      |      |      |      |    |     |     |       |     |     |       |
|----|------|------|----|------|------|------|------|----|-----|-----|-------|-----|-----|-------|
| 15 | 738  | 0.01 | 47 | 0.42 | 1.11 | 0.29 | 12.1 | 61 | 141 | 309 | 12580 | 285 | 465 | 12580 |
| 16 | 949  | 0.01 | 58 | 0.6  | 1.77 | 0.53 | 17.3 | 82 | 180 | 380 | 12172 | 348 | 506 | 12172 |
| 17 | 850  | 0.03 | 53 | 0.52 | 1.42 | 0.42 | 15.1 | 71 | 160 | 331 | 11981 | 280 | 411 | 11981 |
| 18 | 875  | 0.01 | 55 | 0.39 | 1.43 | 0.48 | 14.6 | 72 | 165 | 364 | 12264 | 450 | 606 | 12264 |
| 19 | 1038 | 1.33 | 62 | 0.96 | 2.09 | 0.61 | 19   | 90 | 193 | 407 | 11329 | 371 | 503 | 11329 |
| 20 | 928  | 0.01 | 59 | 0.58 | 1.63 | 0.57 | 16.8 | 81 | 175 | 372 | 12390 | 394 | 531 | 12390 |
| 21 | 980  | 0.01 | 60 | 0.63 | 1.93 | 0.61 | 16.6 | 83 | 187 | 389 | 12045 | 412 | 535 | 12045 |
| 22 | 711  | 0.01 | 37 | 0.54 | 1.49 | 0.52 | 13.8 | 62 | 132 | 265 | 10932 | 188 | 264 | 10932 |

*Gold Rock Ranch granite unit*

TUK 34

|     |      |       |      |       |       |      |      |     |     |      |       |      |      |       |
|-----|------|-------|------|-------|-------|------|------|-----|-----|------|-------|------|------|-------|
| 1   | 1537 | 0.01  | 64   | 1.09  | 2.86  | 1.14 | 24.8 | 121 | 288 | 613  | 8786  | 300  | 397  | 8786  |
| 2   | 1430 | 0.37  | 56   | 1.94  | 4.69  | 1.88 | 36.4 | 139 | 258 | 480  | 8905  | 277  | 265  | 8905  |
| 3   | 2307 | 0.12  | 53   | 0.55  | 2.02  | 0.11 | 23.6 | 159 | 444 | 1153 | 20459 | 637  | 3918 | 20459 |
| 4.1 | 686  | 50.83 | 1180 | 52.49 | 26.57 | 3.92 | 47.6 | 78  | 123 | 260  | 11654 | 152  | 334  | 11654 |
| 4.2 | 764  | 24.72 | 810  | 31.6  | 18.16 | 2.92 | 38.8 | 79  | 133 | 283  | 11368 | 166  | 337  | 11368 |
| 5   | 1224 | 0     | 59   | 0.45  | 1.61  | 0.28 | 17.6 | 96  | 225 | 483  | 11948 | 460  | 773  | 11948 |
| 6   | 895  | 0.01  | 57   | 0.41  | 1.46  | 0.39 | 14.4 | 76  | 169 | 353  | 11548 | 394  | 535  | 11548 |
| 7   | 2530 | 0.06  | 79   | 3.88  | 7.56  | 2.68 | 60.6 | 237 | 454 | 850  | 9418  | 668  | 610  | 9418  |
| 8   | 821  | 0.01  | 48   | 0.39  | 1.16  | 0.31 | 12.5 | 66  | 150 | 327  | 11768 | 285  | 480  | 11768 |
| 9   | 698  | 0     | 35   | 0.23  | 0.85  | 0.18 | 8.7  | 53  | 131 | 310  | 11771 | 163  | 330  | 11771 |
| 10  | 1840 | 0.03  | 117  | 1.68  | 3.67  | 1.75 | 38.9 | 181 | 348 | 690  | 12554 | 1010 | 934  | 12554 |
| 11  | 1940 | 0.28  | 68   | 5.54  | 7.58  | 2.88 | 54.4 | 203 | 399 | 798  | 11116 | 470  | 480  | 11116 |
| 12  | 1107 | 0     | 44   | 0.6   | 1.6   | 0.6  | 17.9 | 86  | 206 | 439  | 12420 | 194  | 340  | 12420 |

TUK 44

|    |      |       |     |      |      |      |      |     |     |      |       |      |      |       |
|----|------|-------|-----|------|------|------|------|-----|-----|------|-------|------|------|-------|
| 1  | 3103 | 0.062 | 248 | 3.71 | 7.69 | 3.19 | 71.9 | 326 | 583 | 1059 | 8843  | 2111 | 1491 | 8843  |
| 2  | 1620 | 0.068 | 31  | 3.53 | 5.67 | 1.75 | 43.2 | 164 | 293 | 523  | 9100  | 318  | 302  | 9100  |
| 3  | 1028 | 0.47  | 78  | 1.48 | 2.68 | 1.12 | 22.6 | 104 | 197 | 419  | 10522 | 621  | 656  | 10522 |
| 4  | 1563 | 0.028 | 102 | 3.08 | 4.99 | 2.93 | 43.3 | 172 | 280 | 489  | 7687  | 520  | 318  | 7687  |
| 5  | 565  | 3.655 | 61  | 2.43 | 1.51 | 0.32 | 10.1 | 45  | 108 | 242  | 11839 | 363  | 491  | 11839 |
| 6  | 1784 | 0.091 | 30  | 0.88 | 2.19 | 0.76 | 23   | 153 | 380 | 865  | 10824 | 132  | 499  | 10824 |
| 7  | 864  | 3.342 | 37  | 4.05 | 2.92 | 0.23 | 20.9 | 94  | 164 | 290  | 9688  | 191  | 558  | 9688  |
| 8  | 556  | 0.343 | 34  | 0.51 | 0.71 | 0.32 | 7.4  | 43  | 110 | 284  | 11314 | 266  | 746  | 11314 |
| 9  | 939  | 0.003 | 55  | 0.64 | 1.42 | 0.48 | 15.6 | 82  | 184 | 387  | 11023 | 464  | 627  | 11023 |
| 10 | 1296 | 0.024 | 67  | 2.04 | 3.38 | 1.26 | 28.8 | 124 | 254 | 476  | 9335  | 630  | 493  | 9335  |
| 11 | 1761 | 0.021 | 68  | 1.99 | 3.51 | 1.47 | 30.3 | 151 | 343 | 732  | 8683  | 254  | 332  | 8683  |
| 12 | 1347 | 0.025 | 20  | 2.04 | 3.94 | 0.55 | 33.2 | 137 | 252 | 415  | 9864  | 204  | 501  | 9864  |

1. Analytical procedures are described in Barth and Wooden (2010)

Table DR5. Pb isotopic compositions for feldspar from Jurassic volcanic and plutonic rocks, lower Colorado River region, Arizona and California.

| Sample                        | $^{206}\text{Pb}/^{204}\text{Pb}$ | $^{207}\text{Pb}/^{204}\text{Pb}$ | $^{208}\text{Pb}/^{204}\text{Pb}$ | Sample                                      | $^{206}\text{Pb}/^{204}\text{Pb}$ | $^{207}\text{Pb}/^{204}\text{Pb}$ | $^{208}\text{Pb}/^{204}\text{Pb}$ |
|-------------------------------|-----------------------------------|-----------------------------------|-----------------------------------|---------------------------------------------|-----------------------------------|-----------------------------------|-----------------------------------|
| <i>Dome Rock sequence</i>     |                                   |                                   |                                   | <i>Middle Camp porphyritic granodiorite</i> |                                   |                                   |                                   |
| TUK13                         | 19.06                             | 15.661                            | 39.388                            | MM8716                                      | 19.26                             | 15.67                             | 39.7                              |
| TUK18                         | 18.841                            | 15.658                            | 39.169                            | TUK70                                       | 19.129                            | 15.689                            | 39.606                            |
| TUK63                         | 19.311                            | 15.708                            | 38.849                            | TUK67                                       | 19.128                            | 15.674                            | 39.553                            |
| TUK17                         | 19.025                            | 15.68                             | 39.543                            | 9 DT 1                                      | 19.11                             | 15.671                            | 39.529                            |
| TUK29                         | 18.491                            | 15.626                            | 38.547                            | TM228                                       | 18.638                            | 15.626                            | 39.005                            |
| TUK40                         | 19.33                             | 15.63                             | 39.31                             | TM238                                       | 18.139                            | 15.608                            | 39.659                            |
| TUK61                         | 18.856                            | 15.621                            | 39.038                            | TUK8                                        | 18.902                            | 15.674                            | 39.096                            |
| TUK46                         | 18.589                            | 15.622                            | 38.603                            | TUK9                                        | 17.463                            | 15.558                            | 37.578                            |
| TUK82                         | 19.042                            | 15.65                             | 39.291                            | TM650                                       | 18.766                            | 15.637                            | 38.998                            |
| TUK81                         | 18.331                            | 15.584                            | 38.275                            | TUK37                                       | 18.996                            | 15.683                            | 39.496                            |
|                               |                                   |                                   |                                   | TUK31                                       | 18.986                            | 15.67                             | 39.184                            |
|                               |                                   |                                   |                                   | TUK73                                       | 18.957                            | 15.689                            | 39.186                            |
| <i>Araz Wash diorite unit</i> |                                   |                                   |                                   | PT285                                       | 18.63                             | 15.629                            | 38.852                            |
| 9 DT 2                        | 19.074                            | 15.666                            | 39.456                            | TUK42                                       | 19.195                            | 15.657                            | 39.348                            |
| 9 DT 6                        | 18.397                            | 15.601                            | 39.081                            | TUK57                                       | 18.445                            | 15.606                            | 38.503                            |
| TM652                         | 18.552                            | 15.626                            | 38.528                            | 6 DT 6                                      | 18.981                            | 18.638                            | 39.205                            |
| 7DT1                          | 18.335                            | 15.602                            | 38.322                            | PT-285                                      | 18.63                             | 15.629                            | 38.852                            |
| PT 383                        | 18.386                            | 15.579                            | 38.364                            | SFMG                                        | 18.463                            | 15.599                            | 38.391                            |
| PT 279                        | 18.471                            | 15.572                            | 38.324                            | TUK48                                       | 18.995                            | 15.656                            | 39.329                            |
| 7 DT 7                        | 18.847                            | 15.642                            | 39.088                            | 6DT4                                        | 19.117                            | 15.666                            | 39.24                             |
| PT 291                        | 18.928                            | 15.636                            | 38.957                            | 6DT5                                        | 18.898                            | 15.637                            | 38.935                            |
| TM652                         | 18.552                            | 15.626                            | 38.528                            |                                             |                                   |                                   |                                   |
| PT279                         | 18.471                            | 15.572                            | 38.324                            | <i>Gold Rock Ranch granite unit</i>         |                                   |                                   |                                   |
| TM789                         | 18.5                              | 15.612                            | 38.634                            | MM87-20                                     | 19.95                             | 15.75                             | 40.2                              |
| TM562                         | 19.553                            | 15.739                            | 39.191                            | TUK65                                       | 19.758                            | 15.733                            | 40.338                            |
| TM457                         | 18.348                            | 15.597                            | 38.335                            | TUK68                                       | 19.669                            | 15.736                            | 40.297                            |
| PT369                         | 18.474                            | 15.606                            | 38.501                            | TUK69                                       | 19.389                            | 15.692                            | 39.666                            |
| TM594                         | 19.284                            | 15.691                            | 38.745                            | TUK36                                       | 18.713                            | 15.641                            | 38.927                            |
| TUK57                         | 18.445                            | 15.606                            | 38.503                            | TUK32                                       | 19.149                            | 15.658                            | 39.148                            |
| TUK58                         | 18.594                            | 15.618                            | 38.555                            | TUK59                                       | 18.896                            | 15.661                            | 39.232                            |
| PT360                         | 18.509                            | 15.595                            | 38.297                            | TUK34                                       | 19.489                            | 15.668                            | 39.558                            |
| TUK75                         | 19.115                            | 15.677                            | 39.318                            | TUK60                                       | 19.107                            | 15.668                            | 39.217                            |
| TUK58                         | 18.594                            | 15.618                            | 38.555                            | MC144                                       | 18.867                            | 15.654                            | 38.951                            |
|                               |                                   |                                   |                                   | TUK80                                       | 18.698                            | 15.637                            | 38.861                            |
| <i>Dike swarm</i>             |                                   |                                   |                                   | TUK47                                       | 18.897                            | 15.661                            | 39.099                            |
| TUK26                         | 19.397                            | 15.655                            | 39.029                            | TUK44                                       | 18.494                            | 15.616                            | 38.581                            |
| TUK12                         | 18.501                            | 15.65                             | 38.745                            |                                             |                                   |                                   |                                   |

1. Isotopic compositions measured from feldspar mineral separate after standard chromatography separation of elements Finnigan MAT261 at the U.S. Geological Survey, Menlo Park

Table DR6. Sr and Nd isotopic compositions for Jurassic volcanic and intrusive rocks, lower Colorado River region, Arizona and California.

| Sample number                                    | Location | Age | Rb (ppm) | Sr (ppm) | <sup>87</sup> Rb/ <sup>86</sup> Sr | 87Sr/ 86Sr(m) | <sup>87</sup> Sr/ <sup>86</sup> Sr(t) | Sm (ppm) | Nd (ppm) | Sm/Nd  | <sup>147</sup> Sm/ <sup>144</sup> Nd | <sup>143</sup> Nd / <sup>144</sup> Nd | $\epsilon_{Nd(m)}$ | $\epsilon_{Nd(t)}$ | <sup>143</sup> Nd/ <sup>144</sup> Nd(t) |
|--------------------------------------------------|----------|-----|----------|----------|------------------------------------|---------------|---------------------------------------|----------|----------|--------|--------------------------------------|---------------------------------------|--------------------|--------------------|-----------------------------------------|
| <i>Dome Rock sequence</i>                        |          |     |          |          |                                    |               |                                       |          |          |        |                                      |                                       |                    |                    |                                         |
| TUK 81                                           | CMM      | 180 | 96       | 890      | 0.31                               | 0.70726       | 0.70649                               |          |          |        |                                      |                                       |                    |                    |                                         |
| TUK-63                                           | DRM      | 170 | 130      | 320      | 1.18                               | 0.7139        | 0.71106                               | 6.91     | 39.58    | 0.1747 | 0.1056                               | 0.51202                               | -12.1              | -10.1              | 0.511897                                |
| <i>Araz Wash diorite unit</i>                    |          |     |          |          |                                    |               |                                       |          |          |        |                                      |                                       |                    |                    |                                         |
| TM-941                                           | DRM      | 170 | 142      | 330      | 1.25                               | 0.71339       | 0.71038                               | 6.31     | 33.43    | 0.1888 | 0.1142                               | 0.5121                                | -10.6              | -8.8               | 0.51197                                 |
| TM-844                                           | DRM      | 170 | 285      | 80       | 10.33                              | 0.73233       | 0.70736                               |          |          |        |                                      |                                       |                    |                    |                                         |
| TM-457                                           | TP       | 170 | 39       | 690      | 0.16                               | 0.70837       | 0.70797                               | 6.54     | 36.94    | 0.1771 | 0.107                                | 0.51204                               | -11.6              | -9.6               | 0.511925                                |
| TM-791                                           | TP       | 170 | 49       | 790      | 0.18                               | 0.70795       | 0.70752                               | 3.85     | 30.38    | 0.1267 | 0.0766                               | 0.51201                               | -12.2              | -9.6               | 0.511929                                |
| TM-562                                           | TM       | 170 | 20       | 730      | 0.08                               | 0.7087        | 0.70851                               | 1.86     | 8.45     | 0.2199 | 0.133                                | 0.51211                               | -10.4              | -9                 | 0.511958                                |
| TM-452                                           | TM       | 170 | 110      | 220      | 1.45                               | 0.71382       | 0.71032                               | 6.73     | 36.88    | 0.1824 | 0.1102                               | 0.51194                               | -13.6              | -11.7              | 0.511816                                |
| 7-DT-1                                           | TM       | 170 | 56       | 730      | 0.22                               | 0.70673       | 0.70619                               | 5.28     | 30.91    | 0.171  | 0.1033                               | 0.51212                               | -10.2              | -8.1               | 0.511998                                |
| PT-383                                           | TM       | 170 | 62       | 490      | 0.37                               | 0.70686       | 0.70598                               | 6.41     | 32.37    | 0.198  | 0.1197                               | 0.51234                               | -5.9               | -4.2               | 0.512202                                |
| PT-360                                           | TM       | 170 | 10       | 810      | 0.04                               | 0.70613       | 0.70604                               |          |          |        |                                      |                                       |                    |                    |                                         |
| TM 652                                           | TM       | 170 | 16       | 640      | 0.07                               | 0.70731       | 0.70714                               |          |          |        |                                      |                                       |                    |                    |                                         |
| 7-DT-7                                           | CMM      | 170 | 102      | 435      | 0.68                               | 0.70955       | 0.70788                               | 6.26     | 32.54    | 0.1923 | 0.1163                               | 0.51211                               | -10.3              | -8.5               | 0.511979                                |
| MC-1                                             | CMM      | 170 | 97       | 440      | 0.64                               | 0.7106        | 0.7091                                | 9.2      | 48.82    | 0.1884 | 0.1139                               | 0.51207                               | -11                | -9.2               | 0.511944                                |
| TUK-57                                           | CMM      | 170 | 88       | 788      | 0.32                               | 0.70694       | 0.70618                               | 4.17     | 22.01    | 0.1897 | 0.1147                               | 0.51215                               | -9.5               | -7.7               | 0.51202                                 |
| MC-290                                           | CMM      | 170 | 160      | 850      | 0.54                               | 0.70712       | 0.70578                               | 5        | 27.25    | 0.1834 | 0.1109                               | 0.51211                               | -10.4              | -8.5               | 0.511981                                |
| TUK-58                                           | CMM      | 170 | 124      | 885      | 0.41                               | 0.70783       | 0.70688                               | 2.74     | 13.39    | 0.2048 | 0.1238                               | 0.51201                               | -12.3              | -10.7              | 0.511869                                |
| MC 57                                            | CMM      | 170 | 140      | 920      | 0.44                               | 0.70801       | 0.70693                               |          |          |        |                                      |                                       |                    |                    |                                         |
| CM-89-2a                                         | CMM      | 170 | 171      | 419      | 0.41                               | 0.70996       | 0.70706                               |          |          |        |                                      |                                       |                    |                    |                                         |
| CM-88-21                                         | CMM      | 170 | 78       | 443      | 0.18                               | 0.70877       | 0.70752                               |          |          |        |                                      |                                       |                    |                    |                                         |
| CM-89-7a                                         | CMM      | 170 | 68       | 534      | 0.13                               | 0.71035       | 0.70944                               |          |          |        |                                      |                                       |                    |                    |                                         |
| CM-88-5                                          | CMM      | 170 | 107      | 543      | 0.2                                | 0.70962       | 0.70822                               |          |          |        |                                      |                                       |                    |                    |                                         |
| <i>Middle Camp porphyritic granodiorite unit</i> |          |     |          |          |                                    |               |                                       |          |          |        |                                      |                                       |                    |                    |                                         |
| 9-DT-1                                           | LMM      | 165 | 164      | 360      | 1.32                               | 0.71210       | 0.70901                               |          |          |        |                                      |                                       |                    |                    |                                         |
| TM-938                                           | DRM      | 165 | 146      | 260      | 1.63                               | 0.71390       | 0.70913                               | 5.73     | 33.44    | 0.1714 | 0.1036                               | 0.51206                               | -11.2              | -9.3               | 0.51195                                 |
| TM-635                                           | TP       | 165 | 115      | 330      | 1.01                               | 0.71147       | 0.70910                               | 5.19     | 31.17    | 0.1665 | 0.1007                               | 0.51206                               | -11.2              | -9.2               | 0.511954                                |
| TM-653                                           | TP       | 165 | 90       | 540      | 0.48                               | 0.70992       | 0.70879                               | 6.14     | 34.97    | 0.1757 | 0.1062                               | 0.51205                               | -11.5              | -9.6               | 0.511932                                |
| TM-636                                           | TP       | 165 | 185      | 140      | 3.83                               | 0.71339       | 0.70924                               | 1.81     | 12.19    | 0.1484 | 0.0897                               | 0.51197                               | -13                | -10.8              | 0.51188                                 |
| TM-651                                           | TP       | 165 | 140      | 410      | 0.99                               | 0.73233       | 0.70740                               | 5.19     | 36.79    | 0.141  | 0.0852                               | 0.51209                               | -10.8              | -8.5               | 0.511996                                |
| TM-228                                           | MM       | 165 | 115      | 415      | 0.80                               | 0.70837       | 0.70896                               | 5.49     | 32.35    | 0.1698 | 0.1026                               | 0.51205                               | -11.4              | -9.5               | 0.511945                                |
| TM-558                                           | TM       | 165 | 96       | 490      | 0.57                               | 0.70795       | 0.70978                               | 8.55     | 46.8     | 0.1827 | 0.1105                               | 0.51207                               | -11.2              | -9.3               | 0.511947                                |
| PT-280                                           | CM       | 165 | 10       | 580      | 0.05                               | 0.70870       | 0.70611                               | 2.15     | 8.74     | 0.2461 | 0.1487                               | 0.51238                               | -5.1               | -4                 | 0.512214                                |
| PT-285                                           | CM       | 165 | 74       | 500      | 0.43                               | 0.71382       | 0.70921                               | 7.39     | 39.15    | 0.1889 | 0.1142                               | 0.51207                               | -11.1              | -9.3               | 0.511948                                |
| <i>Gold Rock Ranch granite unit</i>              |          |     |          |          |                                    |               |                                       |          |          |        |                                      |                                       |                    |                    |                                         |
| TM-594                                           | DRM      | 160 | 250      | 130      | 5.57                               | 0.70726       | 0.71471                               |          |          |        |                                      |                                       |                    |                    |                                         |
| TUK-34                                           | CMM      | 160 | 210      | 100      | 6.09                               | 0.71390       | 0.71072                               | 5.45     | 32.25    | 0.1691 | 0.1022                               | 0.51211                               | -10.4              | -8.4               | 0.512                                   |
| AG-25                                            | CMM      | 160 | 250      | 162      | 4.47                               | 0.72107       | 0.7109                                | 5.85     | 39.5     | 0.1482 | 0.0896                               | 0.51204                               | -11.6              | -9.5               | 0.511947                                |
| AG7                                              | CMM      | 160 | 200      | 390      | 1.05                               | 0.71212       | 0.70874                               | 0.24     | 0.54     | 0.4369 | 0.2641                               | 0.51211                               | -10.3              | -11.7              | 0.511834                                |
| AG 4                                             | CMM      | 160 | 174      | 325      | 1.55                               | 0.71339       | 0.70967                               |          |          |        |                                      |                                       |                    |                    |                                         |
| AG 40                                            | CMM      | 160 | 225      | 210      | 3.1                                | 0.73233       | 0.70871                               |          |          |        |                                      |                                       |                    |                    |                                         |
| MC 174                                           | CMM      | 160 | 220      | 245      | 2.6                                | 0.70837       | 0.7085                                |          |          |        |                                      |                                       |                    |                    |                                         |
| MC 90                                            | CMM      | 160 | 240      | 240      | 2.89                               | 0.70795       | 0.71085                               |          |          |        |                                      |                                       |                    |                    |                                         |
| AG 3                                             | CMM      | 160 | 260      | 188      | 4.01                               | 0.70870       | 0.71060                               |          |          |        |                                      |                                       |                    |                    |                                         |
| MC54                                             | CMM      | 160 | 140      | 510      | 0.79                               | 0.71382       | 0.70651                               |          |          |        |                                      |                                       |                    |                    |                                         |
| TM-939                                           | DRM      | 158 | 194      | 112      | 5.02                               | 0.70726       | 0.71273                               | 3.98     | 21.69    | 0.1833 | 0.1108                               | 0.51209                               | -10.6              | -8.8               | 0.511974                                |
| TUK-36                                           | TP       | 158 | 110      | 310      | 1.03                               | 0.71390       | 0.70842                               |          |          |        |                                      |                                       |                    |                    |                                         |
| <i>Dike swarm</i>                                |          |     |          |          |                                    |               |                                       |          |          |        |                                      |                                       |                    |                    |                                         |
| TUK-26                                           | TM       | 158 | 65       | 185      | 1.02                               | 0.70994       | 0.70766                               | 8.83     | 49.04    | 0.18   | 0.1088                               | 0.51216                               | -9.2               | -7.5               | 0.512051                                |
| TUK-12                                           | MM       | 158 | 42       | 940      | 0.13                               | 0.70595       | 0.70565                               | 5.87     | 30.7     | 0.1912 | 0.1156                               | 0.51248                               | -3                 | -1.4               | 0.512366                                |

1. Isotopic compositions measured after standard chromatography separation of elements on Finnigan MAT261 at the U.S. Geological Survey, Menlo Park. Rubidium and Sr concentrations are from Table 1.

Sm and Nd concentrations were measured using isotope dilution techniques at the U.S. Geological Survey in Menlo Park.

2. Locations: CM, Chocolate Mountains; CMM, Cargo Muchacho Mountains; DRM, Dome Rock Mountains; MM; Mule Mountains TM, Trigo Mountains; TP, Trigo Peaks.
